# Supplementary material
Source: publisher figshare collection journal article supplement (https://geolsoc.figshare.com/ndownloader/files/25488548)
Supplement: Supplementary file 1 [file 25488548]

## Sheet: Appendix 3 Apatite Geochemistry
Sample Name	V (ppm)	V 2σ (ppm)	Mn (ppm)	Mn 2σ (ppm)	Sr (ppm)	Sr 2σ (ppm)	Y (ppm)	Y 2σ (ppm)	Zr (ppm)	Y 2σ (ppm)	La (ppm)	La 2σ (ppm)	Ce (ppm)	Ce 2σ (ppm)	Pr (ppm)	Pr 2σ (ppm)	Nd (ppm)	Nd 2σ (ppm)	Sm (ppm)	Sm 2σ (ppm)	Eu (ppm)	Eu 2σ (ppm)	Gd (ppm)	Gd 2σ (ppm)	Tb (ppm)	Tb 2σ (ppm)	Dy (ppm)	Dy 2σ (ppm)	Ho (ppm)	Ho 2σ (ppm)	Er (ppm)	Er 2σ (ppm)	Tm (ppm)	Tm 2σ (ppm)	Yb (ppm)	Yb 2σ (ppm)	Lu (ppm)	Lu 2σ (ppm)	Th (ppm)	Th 2σ (ppm)	U (ppm)	U 2σ (ppm)	Cl (ppm)	Cl 2σ (ppm)	F (ppm)	F 2σ (ppm)			*table definitions: Sample Name = apatite sample grain analysed for geochemical concentration; XX (ppm) = elemental concentration of analysed apatite grain, expressed as parts per million; XX 2σ (ppm) = two-sigma error of respective elemental concentration, expressed as parts per million; elemental concentrations of V, Mn, Sr, Y, Zr, La, Ce, Pr, Nd, Sm, Eu, Gd, Tb, Dy, Ho, Er, Tm, Yb, Lu, Th, and…
CS-1_1	21.7	1.3	367.5	7.6	1483	25	626	13	1.32	0.3	2671	52	5570	120	696	14	2862	59	461	11	96.8	2.1	290.7	7.1	30	0.88	133.5	3.6	21.93	0.7	50.8	1.8	6	0.27	33.2	1.5	4.22	0.2	196.7	6.8	79	1.7	1754.47	418.767	31776.1	862.969
CS-1_2	29.3	1.3	423.1	7.7	1397	23	450	16	2.3	0.43	3230	110	5870	170	636	20	2450	81	350	13	46.7	1.7	225.6	7.5	21.69	0.77	97.2	3.6	16.59	0.7	37.8	2	4.48	0.22	25.8	1.6	3.4	0.24	200	13	53.8	1	2165.31	447.972	33842.2	883.877
CS-1_3	27.7	1.4	453.6	7.6	1347	25	483	23	2.07	0.42	2940	120	5680	220	665	28	2600	110	398	18	56.2	2.9	245	11	24.6	1.1	107.8	5.8	17.42	0.93	40.8	2.2	4.88	0.3	28.3	1.5	3.57	0.22	181	11	29.37	0.69	1691.49	413.833	32743.5	873.773
CS-1_4	38.8	1.6	480.6	9.9	1521	30	490	17	2.73	0.42	3242	90	5900	170	666	21	2603	78	401	13	55.4	2.1	253.3	9.2	26.26	0.98	112.9	4.3	19.17	0.76	42.9	1.6	4.91	0.19	27.8	1.4	3.43	0.18	201.5	7.7	28.85	0.82	2469.48	467.937	33052	875.369
CS-1_5	25.8	1.3	471	9.9	1284	22	633	11	3.07	0.31	3111	51	6340	110	793	14	3204	60	509	12	81.2	1.9	318.4	6.7	32.39	0.77	144.1	3.2	23.04	0.6	52.3	1.5	6.39	0.2	35.7	1	4.71	0.17	218.6	4.7	26.07	0.67	2755.74	486.508	30659.1	848.601
CS-1_6	28.9	1.5	507	14	1426	34	504	10	3.11	0.5	2945	71	5850	120	706	16	2828	55	439	12	67.5	1.8	265	7.2	26.87	0.83	117.5	3.6	19.37	0.72	42.7	1.8	4.98	0.33	28.3	1.4	3.55	0.19	176.6	4.9	20.66	0.55	2472.92	468.516	33113	875.991
CS-1_7	25.4	1.2	500.5	8.8	1378	20	472	11	3.02	0.36	3042	60	5850	110	696	13	2728	56	400	11	62.9	1.5	248.8	5.7	24.87	0.81	107.5	3.2	17.44	0.59	40.4	1.3	4.69	0.31	28.2	1.4	3.36	0.25	178.6	5.8	21.6	0.61	2977.77	500.381	30870.1	851.972
CS-1_8	28.4	1.4	502	10	1400	26	519.8	9.1	3.2	0.45	2690	47	5510	110	667	12	2710	59	416.7	8.7	63.7	1.3	260.9	6.2	27.05	0.69	117.4	3.5	18.95	0.83	43.4	1.7	5.25	0.26	30.2	1.3	3.6	0.19	172.3	3.3	20.08	0.63	2181.83	448.955	32650.2	871.904
CS-1_9	28	1.5	325.7	8.5	1465	36	512.3	7.6	0.78	0.21	2088	36	4650	110	585.3	9.5	2437	46	395	10	49.7	1.4	248.3	6.1	25.67	0.7	115	3.6	18.8	0.5	41.5	1.1	4.9	0.28	26.8	1.4	3.05	0.18	94.9	2.3	35.43	0.77	2605.34	477.103	34124.3	886.229
CS-1_10	28.4	2.5	326.1	8.8	1338	35	869	23	3.31	0.44	3467	80	7620	170	985	27	4090	110	670	19	98.8	3	422	14	41.8	1.6	194.7	8.4	31.4	1.5	71.1	3.5	8.88	0.6	47.8	2.1	5.99	0.35	295	12	43.9	1.4	2850.64	492.443	31208.7	856.554
CS-1_11	29.1	1.2	422.9	9.6	1346	21	436	14	2.02	0.3	3943	73	6360	120	674	15	2551	64	361	11	48	1.4	232.3	7.9	22.18	0.85	98.1	3.9	16.17	0.67	36.3	1.6	4.21	0.24	24.6	1.1	3.47	0.19	224.6	6.2	68.1	1.2	2448.42	466.5	32851.6	872.946
CS-1_12	26.6	1.5	404	10	1394	27	873	22	3.45	0.6	3613	79	7920	180	1010	22	4114	99	665	19	110.4	3.1	409	13	43.1	1.3	196.3	5.1	31.8	1.3	71.8	2.5	8.37	0.54	47.6	1.9	5.8	0.46	299.9	7.8	47.1	1.1	1900.45	429.582	32094	864.189
CS-1_13	24.6	1.6	416.9	9	1431	28	785	17	3.14	0.57	3230	60	7010	120	895	17	3674	48	584	15	88.1	2.2	371	11	38	1.2	170.5	6.3	28.17	0.95	64.5	2.3	7.38	0.31	43	1.6	4.87	0.37	223.8	6.3	34.65	0.73	3177.66	512.74	31954.5	863.097
CS-1_14	28.3	1.8	421	13	1328	36	667	16	2.56	0.56	3342	94	6950	180	860	20	3420	100	522	17	81.5	2.4	313.5	8.5	31.5	1.3	144.8	5	23.6	1	53	1.9	6.54	0.27	39.3	1.9	4.67	0.34	237.6	6.5	44.4	1.3	2174.99	448.666	32242.6	866.991
CS-1_15	21	1.3	525	12	1362	27	702	18	4.41	0.38	4119	81	7880	140	937	16	3696	78	568	12	81.7	2.3	362	11	36.2	1.3	160.7	5	25.8	0.95	57.9	2.1	6.88	0.3	39.9	2.2	5.01	0.29	291.2	5.9	35.5	1.3	2881.57	494.518	32089.2	864.907
CS-1_16	30	1.7	459.5	8.3	1513	28	279	12	1.83	0.35	3730	130	5790	210	573	21	2012	81	245	12	40.5	1.9	147.8	9.4	13.76	0.88	59.4	3.9	9.62	0.66	22.1	1.5	2.76	0.19	16.4	1.1	2.5	0.17	189	12	39.8	1.4	1517.12	400.438	32672.9	871.674
CS-1_18	28.5	1.3	476.8	9.3	1303	19	566.2	8.8	3.89	0.37	3118	43	6312	87	771	11	3099	48	474.5	9	75.2	1.3	291.9	5.5	28.97	0.57	128.4	3.1	21.13	0.64	47	1.2	5.69	0.26	31.8	1.3	4.08	0.19	214.1	3.8	29.31	0.64	2612.78	477.575	32187.5	866.352
CS-1_19	21.6	1.4	460	14	1382	34	596	21	2.59	0.57	3264	98	6490	190	787	25	3130	100	480	19	77.4	2.9	296	11	29.4	0.97	128.3	5.4	22	1	50.1	2.9	5.84	0.29	34.1	1.8	4.22	0.26	231	11	42.2	1.2	2096.19	442.631	32696.7	871.504
CS-1_20	13.3	1	473	14	1372	28	678	16	3.4	0.57	3637	39	7250	100	892	11	3560	72	554	15	76	2.8	344.3	7.4	34.3	1	152.1	6.1	24.9	0.81	55.3	1.5	6.56	0.35	35.8	1.9	4.6	0.34	239.3	4.5	35.6	1	2055.95	440.323	33472.1	879.212
CS-1_21	29.7	1.7	413	11	1377	24	574	23	2.64	0.49	2941	98	5840	200	718	27	2920	110	455	16	71.6	2.5	283	12	28.4	1.2	131	6.1	20.9	0.97	48.6	2.9	6.02	0.42	32.4	2.3	4.36	0.36	204	11	30.5	1.3	2516.22	471.156	32680.9	872.508
CS-1_22	17.7	1.1	459.6	9	1372	27	326.8	5.9	1	0.23	2117	39	4175	73	465.2	7.3	1850	31	274.2	6.7	43.2	1.1	174	5.1	16.9	0.55	73	1.8	12.25	0.42	27.67	0.85	3.2	0.19	17.8	1	2.49	0.16	98.9	2.7	21.77	0.61	1430.06	393.541	32845.4	874.969
CS-1_23	45.2	1.8	342.2	8.2	1421	31	540	15	1.97	0.31	2604	61	5540	120	699	15	2866	72	438	13	63.1	1.8	264.7	8.5	26.71	0.66	118.4	4.2	19.52	0.61	43.1	1.8	5.34	0.3	30.5	1.3	3.84	0.2	191.2	4.3	41.3	1.1	2398.59	463.468	33062.9	876.603
CS-1_24	32.1	1.6	492	11	1346	31	558	12	3.7	0.49	3241	77	6170	140	730	17	2920	65	449	11	61.8	1.7	278.7	6.7	28.71	0.7	123.5	4	20.27	0.65	45.8	1.2	5.45	0.23	32.7	1.4	4	0.23	204.1	5.3	28.01	0.6	1976.03	434.513	34049.7	886.92
CS-1_25	34.1	1.7	433.5	9	1360	21	672	18	1.93	0.27	3094	72	6620	160	827	22	3318	93	519	14	83.4	2.4	315	11	33.3	1.2	144.1	4.3	23.8	0.83	53.4	2.1	6.73	0.35	38.8	1.5	4.83	0.21	216.1	9.8	48.11	0.79	2410.09	464.429	30006.4	842.04
CS-1_26	28.68	0.98	376.6	7.2	1381	24	693	13	2.99	0.31	2991	68	6520	110	833	17	3441	64	547	14	88.9	2.2	336.3	9.6	35.1	1.1	152.5	4.7	24.59	0.66	55.2	1.6	6.76	0.3	37.7	1.2	4.58	0.2	249.6	9.1	39.55	0.77	1824.27	423.876	32885.9	873.785
CS-1_27	25.1	1.4	344.1	6.8	1423	26	622	13	2.73	0.4	3023	60	6810	140	871	18	3612	73	543	15	77.2	2.5	330	10	31.5	1	137.2	3	22.25	0.79	48.9	2.4	5.94	0.37	33.4	1.7	3.81	0.28	237	8.4	48.5	0.94	2325.23	458.387	34195.2	885.929
CS-1_28	24.6	1.3	492	12	1427	26	801	17	3.99	0.46	3538	65	7470	150	937	20	3848	78	622	16	94.5	2.5	394.2	9.5	40.2	1	178.3	5	29.41	0.87	65	2.1	7.9	0.38	45.2	1.8	5.33	0.27	267.1	5.6	30.13	0.75	3018.18	502.89	30816.6	850.945
CS-1_29	35.1	1.3	364.6	8.9	1526	38	383.4	8.9	1	0.34	1954	42	4103	83	479	11	1960	44	306.5	8.1	48.9	1.2	192.1	6.2	19.23	0.66	84.2	3.7	13.95	0.54	31.4	1.5	3.73	0.23	20.4	1.6	2.68	0.22	109.1	5.1	41.9	1.4	1617	408.043	34224.8	890.331
CS-1_30	24.4	1.7	469	15	1414	32	471	19	3.11	0.56	4060	84	6820	160	740	23	2792	92	396	15	52.3	2.5	244	10	23.8	1.2	104.2	4.7	17.93	0.81	38.1	2.6	4.62	0.5	27.5	2.1	3.51	0.28	258.4	8.4	35.7	1.6	2575.78	475.144	32483.4	869.282
CS-1_31	12.52	0.9	373.5	9.4	1576	32	249	6.8	0.84	0.25	3347	67	5020	120	484	10	1698	44	210.8	7.7	32.3	1.6	125.5	5	11.73	0.58	48.4	1.7	8.62	0.39	18.97	0.68	2.36	0.17	14.35	0.94	2.13	0.15	101.2	3.8	77.9	2.1	1535.19	402.075	32728.9	873.711
CS-1_32	30.9	1.3	402	10	1476	28	308.1	7.2	1.05	0.19	2316	41	3988	74	419.3	7.8	1635	35	240.6	6.5	37.8	1.2	159.7	5.1	14.94	0.5	66.6	2.4	11.36	0.42	24.15	0.98	2.9	0.17	16.6	1.1	2.27	0.16	105.3	2.5	34.6	1	1685.24	413.413	33348.4	879.831
CS-1_33	37.9	1.4	399.7	8.8	1449	27	274	4.8	1.08	0.2	2271	39	3948	72	413.1	7.1	1576	27	227	5.5	30.79	0.9	142	3.4	13.18	0.32	58.7	1.8	9.69	0.35	21.64	0.83	2.58	0.13	15.44	0.81	2.06	0.15	130.2	3.1	37.67	0.79	1819.58	423.387	33859.6	886.275
CS-1_34	28.8	1.6	450	10	1330	31	755	24	4.17	0.55	3650	110	7580	220	944	27	3770	120	586	16	89.6	2.8	362	11	36.9	1.1	165.5	5.5	27.3	1.2	61.5	2.2	7.32	0.39	43.5	1.6	5.32	0.24	274	13	33.3	1.1	2780.43	488.641	32676.9	871.467
CS-1_35	27.7	1.3	446	13	1420	36	522	14	3.27	0.51	3336	86	6120	140	704	16	2793	80	419	13	60.2	1.7	266.2	8.3	26.41	0.99	117.6	3.4	18.83	0.73	42	1.9	5.36	0.33	28.6	1.7	3.68	0.25	219.6	5.9	40	1.3	1535.44	402.291	32208.4	866.606
CS-1_36	35.6	2.1	486	11	1353	27	393.5	8.6	1.71	0.34	2730	73	5020	120	571	13	2228	41	326	10	49.5	1.8	207.6	6.5	19.82	0.76	88.7	3	14.99	0.56	33.1	1.4	3.92	0.29	22.8	1.2	2.73	0.16	156.2	6.5	25.3	1.4	1602.47	407.216	34404.2	892.314
CS-1_37	12.42	0.73	519	16	1445	25	542	22	8.51	0.74	3307	73	6490	170	770	22	3064	99	450	15	73.8	2.6	279	10	27.4	1.2	119.4	5.5	19.68	0.84	44.8	2	5.24	0.29	30.8	1.6	4	0.28	176.8	6.4	19.88	0.62	2363.3	461.039	33186.4	876.844
CS-1_38	30.1	1.3	420.5	8.6	1353	18	676	13	2.68	0.43	2996	39	6321	95	797	11	3284	47	531	12	79.5	1.5	332.7	8.1	33.41	0.87	146.3	3.4	24.32	0.53	54.6	1.2	6.55	0.25	37.8	1.4	4.67	0.23	220	4.5	33.61	0.66	3310.25	520.153	32517.6	869.644
CS-1_39	24.6	1.6	526	15	1444	33	679	16	3.17	0.37	3482	89	6970	190	855	20	3446	90	537	15	72.8	3.3	334	12	34.3	0.96	150.4	4.6	24.98	0.93	55.5	2.4	6.51	0.29	40.2	3.1	4.64	0.34	219.7	5.7	28.15	0.75	1793.39	421.561	31655.4	860.242
CS-4_1	11.18	0.66	475	11	262.1	4.4	593.1	8	2.06	0.28	3838	75	6970	120	760	11	2823	39	396.7	7.6	40.79	0.96	258.6	4.8	26.65	0.55	123.3	2.3	21.04	0.54	49.2	1	6.04	0.23	33.5	1.3	4.67	0.23	228.5	3.9	27.62	0.48	704.34	332.512	35449.2	901.041
CS-4_2	14.9	1.2	307.6	7.9	287	14	230.1	5.3	0.46	0.14	1163	23	2309	46	238.7	4.9	894	17	123	3.2	13.68	0.55	86.2	3	8.84	0.3	42.8	1.2	7.61	0.36	18.04	0.84	2.29	0.13	14.75	0.86	2.58	0.14	33.6	1.5	8.53	0.27	174.03	278.45	37160.7	920.463
CS-4_3	21.7	1.2	457	10	290	5.7	215.4	6.6	2.75	0.32	1375	27	2461	52	238.3	5.7	847	20	114.6	3.9	13.89	0.44	78.1	3	8.31	0.29	38.4	1.3	7.24	0.32	17.75	0.71	2.24	0.14	17.06	0.85	2.83	0.19	19.95	0.49	5.92	0.19	588.24	320.793	37466.1	924.379
CS-4_4	13.8	1.5	447.8	9.5	254.2	4.1	427	13	1.12	0.2	2479	58	4810	100	496	13	1729	46	223.2	8.2	23.7	0.84	148.3	5.4	15.31	0.6	72.4	2.8	13.83	0.6	33.9	1.2	4.64	0.2	33.8	1.7	5.71	0.27	143.9	3.6	25.78	0.72	1028.95	361.715	35707.6	904.438
CS-4_5	12.7	1.1	444	13	379	11	419.6	9.4	2.08	0.5	4040	130	6660	170	648	15	2191	58	268.2	9.8	32.2	1.4	166.3	4.5	17.17	0.62	80.5	2.5	14.33	0.71	35.9	1.5	4.43	0.25	29.8	2.2	4.12	0.22	184.2	5.3	22.07	0.78	621.25	324.515	35786.8	902.013
CS-4_6	17	0.76	484.7	9.6	439.8	8.1	475	12	2.19	0.28	3604	54	6420	100	673	10	2382	44	308.9	8.3	37.8	1	193.2	5.1	20.01	0.64	94.2	2.8	16.87	0.63	39	1.3	4.9	0.2	29.2	1.3	3.95	0.2	172.9	3.3	21.77	0.46	758.3	339.021	34108.7	889.725
CS-4_7	10.07	0.65	385.9	6.5	251.3	5.2	452.9	8.4	1.9	0.28	2856	52	5495	97	590	10	2227	38	298.4	6.7	33.4	0.96	196.5	4.3	20.39	0.59	96.5	1.7	16.42	0.52	37.8	1.3	4.6	0.19	26.89	0.99	4	0.2	195.5	3.6	22.75	0.53	621.95	325.998	35099.3	901.785
CS-4_8	31.2	2.2	404	10	271.3	7.3	473	20	5.36	0.81	2440	100	4950	190	559	24	2218	89	324	13	31.1	2.5	212	10	22.1	1.2	100.2	4.8	17.3	1.1	37.9	1.8	4.32	0.39	26.6	1.8	4.02	0.45	84.9	4.2	17.94	0.75	586.42	321.746	35000.8	897.981
CS-4_9	20.2	1	402.3	8.2	263.2	4.9	313.8	6.3	1.17	0.22	1603	27	3292	58	355.4	6.1	1396	27	199.6	5.5	20.05	0.7	136.5	3.9	13.99	0.45	64.6	1.8	11.18	0.38	25.45	0.95	3.02	0.17	18.75	0.9	2.92	0.17	76.4	1.6	12.49	0.38	791.92	340.017	34700.4	892.411
CS-4_10	31.2	2.2	468	16	258.4	8	284.7	6.7	0.71	0.21	1728	44	3426	81	345.1	9.2	1248	27	164.9	5.6	18.25	0.8	113.1	4.4	11.32	0.57	51.5	2.2	9.68	0.52	23	1.4	2.74	0.23	18.6	1.3	3.18	0.29	72.4	2	16.06	0.45	1289.33	383.142	34371.5	890.662
CS-4_11	12.64	0.94	460	12	254.1	5.7	398.6	9.6	0.8	0.21	2544	52	4720	100	474.1	9	1654	32	210	7.5	26.2	1	135.8	4.1	14.45	0.55	66.6	2.3	12.8	0.57	31.6	1.4	4.15	0.26	30.9	1.2	5.59	0.29	123.7	3.2	30.23	0.99	665.43	328.917	36485.3	913.701
CS-4_12	14.8	1.1	305.4	6.2	281.5	5.8	249.8	4.5	1.76	0.31	1641	30	3060	49	300	4.7	1064	18	135	4.4	12.6	0.74	86.7	3.5	9.08	0.45	42.7	1.7	7.73	0.31	18.87	0.65	2.33	0.17	15.9	0.74	3.06	0.16	31.38	0.77	14.93	0.38	480.53	311.075	36208.6	911.964
CS-4_13	19.2	1.3	435	16	331	10	430	15	4.98	0.74	2390	66	4690	180	512	16	1928	52	278.5	8.8	31	1.8	183.9	6.9	18.81	0.89	89.6	3.3	15.22	0.76	37.9	2.2	4.16	0.49	25.9	2	3.49	0.23	116.8	4.5	14.75	0.89	640.32	327.438	35933.4	910.143
CS-4_14	6.62	0.57	504	12	276.9	5.3	557	14	1.64	0.32	3043	65	5880	120	658	13	2442	53	346.6	7.8	34.29	0.95	223	7	23.68	0.77	110.7	3.5	19.16	0.62	44	1.4	5.27	0.25	32.7	1.8	4.61	0.22	162.5	3.3	26.79	0.69	356.12	298.897	34561	893.443
CS-4_15	15.4	0.94	441.8	9	278.2	4.4	458	20	2.17	0.33	3606	59	6290	120	643	17	2302	66	303	10	35.5	1.2	186.4	6.2	19.17	0.83	87.7	3.7	15.26	0.8	36.9	1.8	4.61	0.3	28.7	1.5	4.18	0.29	178.2	6.2	23.48	0.69	631.58	326.45	33832.4	884.521
CS-4_16	9.28	0.73	375.9	8.1	248.6	4.3	601.3	9.4	1.55	0.29	2935	51	6170	110	687	13	2510	42	337.9	6.4	39.2	1.3	216.7	3.6	22.87	0.69	108.7	2.4	19.61	0.5	47.4	1.3	6.32	0.25	42	1.3	7.14	0.29	210.4	3.4	36.77	0.86	605.86	323.196	36519.5	914.872
CS-4_17	4.34	0.47	457.2	7.4	342.8	6.9	741	16	1.57	0.24	3477	66	7070	130	837	16	3257	66	474.4	8.8	46.8	1.3	317.9	7.5	33.59	0.86	154	4	26.84	0.69	60.1	1.5	7.16	0.28	42.8	1.3	5.89	0.25	184.6	3.8	31.53	0.72	481.68	312.788	34227.4	891.391
CS-4_18	10.03	0.88	381.1	8	240.4	4.4	426	13	1.1	0.18	2210	74	4460	110	454	13	1581	47	202.9	6.7	21.3	0.71	137.4	5.2	14.37	0.5	69.5	2.8	13.21	0.44	34.1	1.3	4.56	0.2	32.3	1.6	5.61	0.28	91.8	6.9	26.2	1.1	543.01	316.804	35206.5	902.413
CS-4_19	5.41	0.54	471.1	8.8	314.3	7.2	682	20	1.47	0.26	3362	76	6810	150	770	23	2957	98	416	17	39.8	2.3	277	14	28.7	1.1	138.3	6	24.23	0.83	56.1	2.1	6.85	0.24	43.9	1.7	6.22	0.37	167.3	5.8	32.5	1.2	638.78	326.228	34718	891.739
CS-4_20	20.2	1.1	439	12	261.3	4.8	493	11	2.94	0.38	2821	44	5403	92	590.7	9.6	2181	42	293.1	6.5	33.9	1.1	184.5	7.5	19.8	0.76	91.4	3.3	16.78	0.45	39.1	1.9	5.1	0.24	31.4	1.7	4.65	0.24	139.4	2.3	19.68	0.4	719.6	333.402	34128.4	886.096
CS-4_21	6.81	0.52	444	10	264.1	5.4	598	13	1.09	0.22	3364	56	6470	110	700	11	2532	46	337.9	7.7	33.4	1.1	219.5	6.1	23.39	0.6	110.6	2.8	20.4	0.55	48.9	1.6	5.91	0.21	39.7	1.2	5.94	0.27	176.4	3	31.97	0.59	875.78	348.503	35746.1	904.219
CS-4_22	14.5	1.4	476	11	344.1	9.5	689	19	2.1	0.47	3283	81	6560	150	753	18	2900	64	416	11	42.7	1.6	274.2	7.9	28.9	1	135	3.2	24.01	0.75	55.1	2	6.96	0.44	41.7	2.2	6.11	0.53	200.1	5.3	24.87	0.85	602.39	323.241	33687.3	884.285
CS-4_23	27.8	1.3	435	11	248.1	5.2	303	7	0.79	0.24	1746	39	3459	67	355.6	7.7	1267	28	163.9	4.7	18.07	0.84	105.8	4.7	11.04	0.51	53	2.1	9.75	0.36	24.55	0.99	3.09	0.19	21.5	1.3	3.4	0.22	74.1	1.6	12.35	0.34	466.19	309.452	35314.4	903.759
CS-4_24	8.45	0.54	469.2	5.8	277.6	4.8	530	11	1.39	0.23	2979	48	5705	77	621	11	2363	40	329.1	8.1	33.2	1.1	218.9	5.6	22.78	0.67	108.8	3.2	18.75	0.57	43.3	1.4	5.46	0.17	31.3	1.5	4.83	0.25	175.7	3.1	28.13	0.54	527.06	315.748	35073.5	899.144
CS-4_25	24.4	1.8	444	10	259	4	415.5	8	0.92	0.23	2215	45	4549	86	499	11	1928	37	269.9	6.8	26.8	1	176.2	5.5	18.71	0.6	83.6	2.3	14.72	0.42	33.5	1.3	4.07	0.26	23.5	1.1	3.24	0.17	101.2	2.3	15.72	0.43	571.86	320.192	36848.2	917.587
CS-4_26	22.47	0.98	396.5	8.8	254.9	6.4	437.4	8.9	2.04	0.36	1968	36	4212	72	464.2	9.4	1761	33	246.6	5.5	24.2	1	167.9	4.6	17.97	0.67	82.4	2.6	14.68	0.48	35.6	1.5	4.64	0.31	28.4	1.8	4.5	0.2	94.6	1.8	17.56	0.44	808.82	341.515	35183.8	897.138
CS-4_27	12.8	1.3	440.3	9.6	274.9	6.2	535	18	1.83	0.31	2933	70	5780	170	647	19	2430	73	329	12	36.4	1.4	207.3	6.8	22.4	1.1	104	4.2	18.7	0.73	42.7	1.8	5.37	0.35	33	1.9	4.73	0.23	192.3	7.3	25.72	0.84	437.68	306.54	37808	928.867
CS-4_28	5.09	0.46	287.4	5.7	337.4	6.7	543.3	9.5	0.71	0.17	2329	40	5069	82	553.8	9.3	2002	35	261.8	5	33.6	1	171.9	4.7	18.51	0.57	88.8	2.7	17.03	0.48	42.7	1.3	6.23	0.3	44.1	1.8	7.65	0.35	118.7	2.5	25.86	0.58	187.33	281.093	37134.8	919.695
CS-4_29	24.8	1.3	374.7	8.5	255.6	7	317.5	8.5	0.46	0.22	1588	39	3381	92	369.5	8.1	1432	37	211.7	8.2	19.4	1	136.2	4.8	14.66	0.56	66.7	2.4	11.43	0.58	26.9	1.2	3.1	0.22	18.8	1	2.94	0.18	74.7	3.2	14.23	0.57	469.91	309.761	35541.6	905.543
CS-4_30	7.7	1.7	472	12	361.7	9	585	21	1.54	0.35	3009	80	5890	160	674	20	2579	72	365	11	41.3	1.3	236	11	24.9	1.2	117.4	4.9	21.01	0.96	47.2	2.2	6.03	0.43	33.3	2.3	4.98	0.39	180.7	5.6	30.2	1.7	846.61	345.695	35828.4	906.265
CS-4_31	6.73	0.54	424	15	234.2	7.3	571	20	0.84	0.2	2478	60	5180	140	572	16	2117	55	287	11	28.7	1.6	190	7	20.87	0.88	99.8	3.8	18.46	0.71	45.4	2.2	6.06	0.34	41.7	2.4	6.94	0.38	135.1	5.2	26.5	1	324.72	296.093	35875.8	905.311
CS-4_32	20.1	1.7	386.6	6.8	262.8	7.7	610	40	2.26	0.65	2560	160	5010	290	548	33	2050	130	290	17	38.5	2.6	208	18	22.3	1.5	108.7	6.8	20.2	1.3	51.7	3.7	6.52	0.64	41.2	3.5	6.86	0.54	331	34	30.3	1.9	613.01	324.941	34978.5	895.778
CS-4_33	2.63	0.5	439	11	281.1	8	652	20	1.42	0.27	2910	78	5880	160	682	20	2665	81	388	12	39.7	1	264.6	9.8	27.23	0.86	130.4	5	23.07	0.83	52	2.1	6.55	0.36	41.4	1.8	6.29	0.42	139.4	4.5	27.02	0.92	478.77	311.233	35084.5	899.279
CS-4_34	15.7	2.3	429.6	9.2	260.2	6	373	11	0.58	0.17	1725	46	3488	98	358	11	1296	35	169.9	7.2	21.17	0.75	114.2	4.1	12.31	0.41	61.7	2.3	11.78	0.52	30	1.3	4.12	0.23	29.1	1.4	4.77	0.27	69.4	2.4	17.13	0.55	800.04	340.179	35381.1	901.369
CS-4_35	4.73	0.41	438	10	379	8.3	494	12	1.6	0.28	3408	59	6200	130	660	12	2391	45	321.6	7.3	35.86	0.99	201.3	5.9	20.84	0.63	99.4	3.3	16.97	0.54	38.5	1.3	4.63	0.17	27.5	1.4	3.87	0.23	169.8	3.4	30.23	0.65	671.31	328.973	35214.4	897.58
CS-4_36	21.1	1.7	414.3	9.3	339.4	8.1	246.3	5.6	1.11	0.28	2162	57	3789	93	357	10	1190	31	147.2	5.7	24.3	1	89.7	4	9.46	0.49	46.2	2	8.14	0.36	19.5	1.3	2.41	0.2	17.3	1.1	2.57	0.2	51.1	1.7	10.27	0.38	540.93	317.254	36563.7	914.319
CS-4_37	5.64	0.8	427	12	247.7	7	421	19	0.59	0.18	1520	78	3250	160	360	17	1386	63	213	12	23.2	1.5	150.4	6.5	16.02	0.97	74	3.8	13.84	0.66	34.8	2	4.31	0.36	29.8	2	4.26	0.34	68.3	6.2	13.34	0.7	632.46	324.498	35365.2	902.195
CS-4_38	6.36	0.72	386.3	8.7	244.7	4.2	407	12	0.81	0.15	2841	46	5070	130	477	13	1639	52	206.2	8.8	25.6	1.1	136.3	5.5	14.45	0.58	67.3	2.5	13.01	0.54	33.8	1.4	4.45	0.23	30.2	1.4	5.59	0.24	138.1	3.7	31.42	0.67	901.09	349.473	35078.5	896.992
CS-4_39	4.1	0.67	431	10	231	5.9	219.8	5.7	0.089	0.066	1646	31	3069	61	284.4	5.9	925	22	101.9	3.9	13.49	0.74	65.2	3.1	6.82	0.36	31.9	1.3	5.96	0.43	17.16	0.73	2.3	0.18	17.35	0.88	3.33	0.27	36.8	1.1	26.7	0.62	416.41	303.688	36670.6	914.865
CS-4_40	8	0.77	422.4	8.7	374	10	563	10	1.28	0.27	3249	62	6190	130	683	13	2586	54	353.1	7.5	37.7	1.2	228.9	5.3	24.53	0.72	116.4	3.7	19.68	0.64	45.2	1.5	5.31	0.25	32.1	1.8	4.61	0.3	182.7	3.5	28.84	0.59	552.42	317.446	34672.6	892.584
CS-5_1	6.25	0.48	1041	21	56.7	1.5	4397	81	0.16	0.081	434	11	1340	29	218.6	5.1	1188	27	444	11	1.74	0.2	579	12	99.9	2.3	639	14	133.8	3.2	378.7	7.7	56.6	1.4	379.2	9.1	53	1.1	15.37	0.91	6.46	0.3	611.29	323.07	34693.8	892.13
CS-5_2	5.11	0.75	961	20	56.3	2	5610	180	0.95	0.22	787	25	2283	69	364	12	1898	63	647	24	2.41	0.28	783	31	133.1	4.3	831	29	171.8	6.6	478	20	71.5	3	474	19	64.8	3	45.2	3.7	11.92	0.81	308.69	292.713	35441.6	900.38
CS-5_3	2	0.31	1081	22	56.1	1.6	6050	120	0.89	0.2	1018	20	3002	60	466	10	2432	47	774	15	4.39	0.29	872	16	146.4	2.9	902	19	185.2	4	513	11	78	1.7	524	12	72.6	1.6	68.1	1.8	17.35	0.35	325.09	294.535	37129.1	918.225
CS-5_4	0.75	0.19	1126	27	67.2	1.9	5920	130	1.46	0.24	1417	49	3900	130	568	17	2822	81	757	17	7.66	0.46	790	17	130.3	2.9	812	20	171.6	4.2	488	12	77.5	1.8	533	11	74.6	1.9	114.2	2.2	23.74	0.48	667.63	328.634	36353	908.083
CS-5_5	4.05	0.4	1053	19	88.9	1.5	3453	60	1.63	0.68	996	16	2638	43	380.9	7.2	1869	38	515	10	4.77	0.31	544	11	85.8	1.7	516	10	105.3	2.1	286.8	5.6	42.5	1.1	291.4	6.1	39.5	0.79	28.46	0.9	9.12	0.26	475.21	309.666	37120.9	917.079
CS-5_6	4.03	0.59	1007	37	52.7	2.1	5140	160	1.49	0.3	403	13	1264	47	209.9	7.9	1182	39	484	21	1.8	0.31	647	24	116.4	3.6	735	21	158.2	5.1	448	15	67.5	2.3	446	15	62.2	2.7	26.9	1.4	7.65	0.29	445.41	306.698	38558.6	932.655
CS-5_7	2.62	0.49	988	30	52.5	2.2	4760	190	0.067	0.073	650	14	1941	57	304.7	9.3	1591	49	530	18	2.52	0.33	635	23	108.9	4.3	684	29	145.3	6.4	415	19	60	2.6	403	18	56.6	2.4	30.7	2.9	11.69	0.74	299.71	292.541	36322.3	913.331
CS-5_8	17.8	1.4	1105	23	54.9	1.8	3805	65	0.34	0.14	538	15	1516	33	230.6	4.8	1197	26	402	8.8	1.98	0.2	479	10	82.6	1.8	519	11	111.3	2	316.2	5.3	47.2	1.1	320.5	5.9	44.77	0.73	11.6	0.36	4.14	0.15	114.29	272.337	34686.9	897.225
CS-5_9	9.3	2.3	972	21	58.9	2.6	4390	210	1.75	0.34	565	14	1644	41	260.8	6.3	1398	43	473	16	2.56	0.29	570	27	97.1	5	621	32	129.8	7.4	370	22	56	3	378	21	52.8	2.8	24.1	1.6	6.74	0.4	323.73	294.186	34980.6	896.854
CS-5_10	2.75	0.37	1007	23	56.7	2.1	6010	320	0.96	0.28	854	30	2465	92	388	14	2077	87	657	30	3.96	0.43	772	43	129.7	7.7	840	50	180	11	514	35	80.1	5.1	553	36	74.4	4.4	58.3	6.1	14.4	1.4	101.62	270.821	37289.7	922.637
CS-5_11	2.23	0.3	998	26	64.4	2.2	3528	87	0.3	0.12	556	14	1616	31	252.4	4.7	1341	25	422	11	2.44	0.25	468.2	8.3	77.9	1.8	487	11	102.9	3.1	292.5	7.4	46	1.2	313.2	7.9	44.1	0.99	13.43	0.55	4.68	0.21	505	313.011	38110.5	925.59
CS-5_12	2.53	0.39	998	26	74.6	2.1	7140	150	1.73	0.33	758	30	2291	85	371	12	2026	56	732	11	4.13	0.46	935	21	166.6	4.5	1067	32	226.1	6.8	636	22	96.1	3.4	645	21	88.7	3.1	76.6	2.7	17.02	0.64	778.72	338.656	35303.2	897.803
CS-5_13	28.5	2.2	885	22	64.4	1.3	3975	77	2.18	0.3	555	10	1607	27	250.2	5.2	1323	26	478	11	1.77	0.16	586	11	98	2.1	603	13	123.4	2.3	336.4	7	48.4	1.1	309.7	7	42.8	1.2	19.22	0.6	5.25	0.23	251.38	287.701	34974.8	897.237
CS-5_14	17.4	2.9	964	35	64.9	1.7	4580	170	0.54	0.28	588	19	1665	57	255.2	8.5	1334	47	478	20	1.9	0.34	589	21	105	4.2	657	25	137.3	5.4	392	13	57	2.9	375	15	51.3	2	22.9	3.3	7.69	0.8	322.21	294.151	36335.1	910.136
CS-5_15	16.6	1.2	782	12	120.8	2.4	3565	56	0.5	0.16	727	11	2012	31	302.4	4.2	1540	26	546	11	2.6	0.23	628	10	100.9	2.1	598.5	8.7	118.4	2	303.5	5.6	41.58	0.82	266.6	6	35.4	0.95	16.65	0.49	5.64	0.2	643.33	325.556	35530	902.185
CS-5_16	4.16	0.41	1130	26	56.8	1.4	4840	120	1.04	0.26	560	12	1699	38	272.3	5.8	1463	32	537	14	1.78	0.16	653	19	111.7	2.6	696	16	146.1	3.6	407	10	60.7	1.7	397.5	9.9	54.8	1.7	28.69	0.94	9.82	0.33	532.55	315.952	36160	906.047
CS-5_17	3.99	0.44	914	20	73.6	1.9	5050	100	0.62	0.16	641	15	1968	43	322.4	6.7	1799	44	609	15	2.62	0.23	696	19	115.7	2.5	729	18	155.8	4.3	440	11	67.6	1.8	451	11	62.8	1.8	39.5	1.3	11.49	0.52	228.29	284.655	35621.3	901.867
CS-5_18	8.79	0.88	1053	31	61.5	2	3733	98	0.39	0.13	662	19	1869	49	286.7	6.6	1501	36	463	13	2.58	0.27	505	14	84.2	2.7	520	15	108.5	3.1	303	9.2	46.6	1.3	318.7	9	44.2	1.5	17.11	0.94	5.27	0.23	414.27	303.429	35499.3	901.895
CS-5_19	1.94	0.49	945	31	58.3	1.8	6880	170	1.05	0.32	985	60	2850	160	439	22	2320	110	756	24	5.2	0.44	889	32	157.9	5.1	1005	31	216.8	8.3	617	19	95.7	3.6	646	20	88.2	2.4	91	4.7	21.07	0.77	114.29	272.641	36979.4	918.894
CS-5_20	4.11	0.56	921	23	72.3	2.5	5220	230	1.55	0.48	797	25	2303	80	357	11	1871	62	634	21	3.45	0.52	738	31	125.9	6.5	790	34	162.2	7.9	456	21	69	3.2	450	22	62.7	3	47.2	5.8	13	1.3	467.54	309.724	37494.3	925.434
CS-5_21	2.47	0.36	915	22	89.6	2	3294	62	1.06	0.21	756	18	2082	41	310.1	5.6	1599	26	488.3	9.4	3.07	0.22	541	11	86.7	1.7	527	9.9	105.9	2.3	279.4	6.5	40.2	1	265.3	7.2	36.2	1	21.13	0.69	6.61	0.22	528.06	315.724	36364	913.616
CS-5_22	0.79	0.22	954	29	66.6	2	7140	200	1.06	0.28	757	31	2294	78	368	11	2011	52	733	16	3.91	0.34	937	28	166.9	4.7	1072	35	227.6	9.4	643	26	97.8	3	658	26	90.9	3.7	111.2	4.7	28	1.1	434.33	306.497	37050.8	918.734
CS-5_23	4.44	0.96	1028	50	64.2	2.8	5040	230	0.45	0.3	724	37	2110	100	324	16	1755	89	583	32	3.84	0.57	662	33	116.6	5.3	728	30	151.9	6	420	23	64.2	3.3	439	24	59.6	2.3	37.9	2.1	10.08	0.63	554.85	317.547	36332.2	910.732
CS-5_24	3.28	0.43	956	21	69.7	1.4	5400	110	0.63	0.15	466	10	1445	32	238.9	5.3	1361	27	513	12	2.38	0.2	654	13	116.8	2.5	758	16	163.4	3.4	468	10	71	1.7	470	11	65.2	1.8	34.2	1.3	11.03	0.5	291.91	290.691	37773	925.083
CS-5_25	13.31	0.87	924	18	57.3	1.5	4672	77	2.41	0.4	454.8	8.3	1330	22	211.7	3.8	1162	21	435.1	9.2	1.41	0.15	565	11	100.1	1.6	659	12	140.5	2.5	400.1	7.8	59.8	1	397.9	7.8	55.9	1.1	26.73	0.67	7.48	0.17	652.81	327.845	35734.2	906.284
CS-5_26	5	0.62	1054	28	51.5	2	5390	210	0.9	0.24	764	18	2295	55	367.2	9.7	1964	54	669	25	3.38	0.3	772	26	130.4	5.1	801	31	166.9	7.2	469	16	69.5	2.6	486	19	66.8	2.6	44.1	2.5	11.24	0.63	450.96	307.934	35924.4	907.623
CS-5_27	1.65	0.31	1144	24	57.1	1.3	6460	100	3.19	0.69	1139	31	3307	81	510	12	2651	56	826	14	4.14	0.28	905	15	149.6	2.5	928	17	194.2	3.7	548.6	9.4	84.1	1.7	573	11	80.7	1.6	111.7	3.1	31.5	0.76	93.85	269.31	37300.3	919.557
CS-5_28	18.4	1.1	988	22	64.8	1.7	3915	96	0.305	0.092	726	14	1937	34	280.6	5.2	1434	27	451	11	2.74	0.25	513	13	87.8	2	547	13	116.4	3.2	326	8.8	49.7	1.5	336.2	9.6	45.3	1.1	14.47	0.74	5.26	0.17	575.79	320.41	36850.2	918.484
CS-5_29	13.97	0.88	870	24	120.3	2.7	3063	45	1.97	0.3	641	23	1766	57	264.4	7.5	1378	34	433.4	8.9	3.15	0.27	479	11	76.5	1.2	465.4	7.7	94.1	1.8	255.5	4.6	37.6	0.77	249.9	4.1	34.85	0.65	16.56	0.54	4.69	0.18	404.41	303.427	36322.8	913.983
CS-5_30	4.71	0.54	1009	25	67.8	3	4730	140	0.36	0.14	763	29	2264	92	356	15	1912	82	616	26	3.59	0.43	679	23	113.8	3.8	697	21	142.1	4.5	394	13	59.5	2.1	413	16	57.6	1.9	27.7	1.6	8.03	0.39	222	284.427	38319.9	932.898
CS-5_31	4.82	0.7	915	26	62.2	1.7	4787	97	0.78	0.21	428.5	9.9	1324	31	218.7	5.1	1212	26	452.3	9.8	2.09	0.21	580	13	102.8	2.2	674	16	146.2	3.1	422.6	9.2	62.5	1.4	416.4	9.8	58.6	1.6	19.92	0.86	7.15	0.25	454.34	308.594	37299.3	924.306
CS-5_32	2.3	0.39	816	26	93.2	3	4110	240	0.56	0.17	560	17	1562	34	242.6	4.4	1301	28	420	13	3.59	0.31	513	26	89.6	4.5	574	33	122.1	8.3	348	23	52.9	3.3	355	24	49.9	3.1	27.5	4	7.97	0.87	654.27	327.535	36835.2	918.626
CS-5_33	18.5	1.4	1011	25	55.2	1.6	4129	98	0.084	0.059	428.2	9.8	1273	27	205.2	4.5	1130	28	427	11	1.43	0.16	537	14	92.7	2.1	590	12	125.1	3.4	350.8	8.4	51.8	1.5	342.1	7.7	47.3	1.4	12.16	0.56	5.24	0.23	0	0	36076.3	909.787
CS-5_34	5.06	0.92	994	20	59.8	2.6	5670	220	0.59	0.18	509	14	1610	31	272	5.8	1588	36	633	21	2.71	0.24	812	32	139.4	5.7	876	35	180.1	7.8	492	23	72.7	3	488	22	67.6	2.9	72.6	5.2	17.9	1.2	292.11	291.13	36751.3	913.858
CS-5_35	5.34	0.56	1048	26	71.4	1.5	3708	92	0.57	0.15	693	26	1920	67	283.9	8.9	1483	38	429.9	7.5	3.39	0.25	482	12	81	2.3	513	17	107.4	3.5	311	11	47.6	1.3	328.5	8.4	46.3	1.3	19.37	0.49	7.73	0.26	251.76	287.581	38205.6	932.041
CS-5_36	26.1	1	1030	20	61.6	1.6	3324	57	0.204	0.083	672	11	1905	29	289.3	4.6	1492	26	451	10	2.31	0.18	503.3	9.2	81	1.4	496.7	8.6	101.1	2	284.9	5.2	41.56	0.98	284.9	4.9	38.93	0.74	11.05	0.27	4.75	0.16	450.88	308.034	36255.9	912.401
CS-5_37	19.8	1.8	990	21	69.3	2.1	3078	62	0.31	0.12	872	11	2251	31	312.1	4.5	1520	28	396.8	9.4	3.7	0.32	397.2	9.4	66	1.8	422	12	87.9	2.2	249.4	6.9	37.4	0.79	258.2	7.2	34.95	0.99	12.54	0.52	4.2	0.24	405.67	303.455	36915.8	918.856
CS-5_38	9.28	0.68	988	20	60	1.5	3771	61	0.35	0.093	614	15	1768	37	272.9	5.4	1438	25	451	10	2.33	0.22	510.8	9.1	86	1.8	537.6	9.9	112.7	2	320.1	6.6	49	1	322.2	6.8	44.25	0.89	14.14	0.43	5.07	0.17	268.29	289.279	37330.4	923.031
CS-5_39	5.8	1.5	1033	19	56.5	1.5	4037	88	0.56	0.19	511	11	1519	31	239.9	4.9	1303	27	443.7	9.5	1.89	0.24	552	13	91.4	2	579	15	120.7	2.5	336.1	7	49.4	1.1	328.6	9.6	45.6	1.1	14.18	0.53	5.03	0.22	176.23	279.335	35603.8	905.668
CS-5_40	2.87	0.61	1020	30	61.7	3.1	7290	230	1.06	0.47	892	26	2769	75	453	13	2561	76	889	29	3.88	0.46	1088	39	185.6	6.4	1169	32	241.7	7.7	682	19	101.4	4.1	696	23	94.1	2.7	98.2	5	24.1	1.2	159.88	277.435	36309	914.275
CS-6_1	22.1	2.4	400.4	9.4	256.2	5.8	1180	30	0.39	0.15	384	10	1266	28	208.1	4.2	1132	27	299.2	7.9	12.13	0.61	279.6	7.3	37.3	1	204.4	6.2	38.9	1.1	97.5	3.1	12.94	0.43	76.5	2.7	10.08	0.38	20.91	0.75	6.97	0.29	0	0	36632.9	914.782
CS-6_2	13.7	1.2	375.1	9.8	234.8	6.2	1264	38	0.21	0.17	283.7	7.7	1010	31	177.8	5.5	1042	32	309	12	11.86	0.85	298	12	40.9	1.8	219.6	8.1	44.1	1.4	108.6	4.6	14.46	0.68	84.1	3.6	11.05	0.65	19.3	1.2	7.35	0.41	153.26	276.014	36148	908.421
CS-6_3	0.85	0.21	527	16	263	6.8	3040	130	1.25	0.21	1505	64	4560	150	700	18	3474	64	826	19	32.65	0.92	724	27	98	3.8	519	19	101.6	4.3	256	12	34	1.7	201	10	25.6	1.5	144.7	4.4	27.38	0.71	149.57	276.075	35907.2	905.106
CS-6_4	32.5	1.8	452	12	253	4.6	1277	25	1.84	0.29	359	14	1209	43	208.6	6.6	1144	28	322.2	9.3	13.39	0.46	303.6	7	40.13	0.86	223.6	4.8	42.71	0.92	108.9	2.8	14.36	0.37	86.2	2.7	11.32	0.4	23.41	0.69	7.71	0.2	95.7	269.204	37032.9	919.216
CS-6_5	1.11	0.24	498	16	249.3	6.8	2720	120	0.77	0.17	821	27	2746	92	464	15	2498	86	693	25	27.2	1.1	654	27	87.5	3.6	479	21	92.8	4.1	236	10	31	1.6	183.1	9.6	23.8	1.3	121.4	5.8	33.1	1.3	138.33	274.596	36223.8	909.297
CS-6_6	8.6	1.1	531	16	283.1	8.2	1326	75	1.99	0.43	603	13	1800	30	272.3	4.7	1420	31	354	16	14.53	0.84	322	15	42.5	2.3	229	13	44.5	2.7	110.6	7.6	14.32	0.93	88.3	6.4	11.23	0.95	32.5	2.5	9.25	0.68	323.6	293.967	35678	905.022
CS-6_7	2.11	0.47	525	17	269.7	8.6	2480	120	3.46	0.64	1005	39	3120	100	490	19	2555	94	647	25	24.9	1.5	574	25	78.4	3.9	420	20	82.8	4.2	208	12	27.7	1.9	166.6	9.5	21.2	1.3	80.1	5.4	18.8	1.1	91.54	269.237	35072.6	898.539
CS-6_8	1.21	0.21	580	12	276.6	4.9	2279	47	0.79	0.17	1070	69	3280	190	504	25	2560	110	637	20	24.92	0.99	569	14	76.4	1.9	405.9	9.7	78	1.9	196.3	4.6	25.01	0.7	146	2.9	19.17	0.56	116.6	7.7	30.88	0.91	123.2	273.085	35610.7	903.821
CS-6_9	0.29	0.1	597	14	272.3	6.9	3950	150	1.14	0.19	2749	77	7410	170	1119	19	5367	89	1191	27	45.4	1.3	1003	28	131.9	4.2	701	25	134	5.3	334	13	43.7	2.1	263	13	33.3	1.7	310.4	7.1	52.3	0.95	230.29	284.387	36254.2	910.104
CS-6_10	3.49	0.41	411.9	9.7	244.3	6.4	2622	53	0.7	0.17	683	17	2392	59	410.8	8.9	2280	50	644	13	24.54	0.85	588	13	81.8	2.1	449.8	9.8	88.3	2.1	227	5.6	30.22	0.9	182.2	4.8	23.94	0.82	94.5	2.1	25.82	0.7	3.75	258.611	36718.8	916.222
CS-6_11	1.07	0.19	506	11	253.5	5.6	2399	47	0.77	0.18	809	30	2685	82	441	12	2337	46	617	12	25.02	0.72	563	13	75.3	1.7	414.4	8.9	79	1.8	203.1	5.4	26.91	0.75	162.3	5.2	20.87	0.61	113	2.2	30.21	0.68	0	0	37187.1	919.548
CS-6_12	0.79	0.3	500	17	244.6	9.2	2512	93	1.08	0.37	784	30	2541	61	428	17	2312	89	635	16	24.6	1.9	583	23	78.7	3.1	433	17	84.1	3.2	213.8	9.3	28.7	1.7	167.3	7.9	22.2	1.1	107.9	4	25.8	1	141.87	274.271	35416.5	902.257
CS-6_13	0.33	0.12	543	15	254.4	7.3	4310	210	1.04	0.23	2078	79	5970	170	945	24	4778	92	1169	38	44.3	2	1036	40	138.2	6	745	32	145.4	7.4	363	19	48.2	2.6	291	18	36.7	2.5	298.2	9.8	61.7	1.7	228.27	284.72	37101.4	918.312
CS-6_14	14.6	1.5	487	11	261.9	5.7	1960	80	0.78	0.26	865	18	2679	55	419	10	2127	62	533	17	20.7	1	465	20	62.1	2.4	337	13	64.5	2.8	164.8	6.3	21.39	0.89	130.9	5.7	17.09	0.81	70.9	3.6	14.76	0.5	225.47	285.09	39141.7	944.81
CS-6_15	12.4	2.1	474	10	273.1	4.9	1088	20	0.172	0.079	509	15	1562	40	241.7	4.8	1232	25	303.5	7.1	12.06	0.51	264	6.2	34.79	0.87	189.7	4.5	36.3	1	89.6	2.5	11.65	0.44	70.3	2.1	9.47	0.37	21.01	0.55	6.67	0.23	194.19	281.797	37956.1	933.181
CS-6_16	2.76	0.93	476	14	232.9	3.5	2046	99	0.26	0.11	314.7	8.9	1147	37	211.9	8.6	1250	59	408	23	22.51	0.89	420	23	58.6	3.5	335	19	67.2	3.8	177.5	8.2	24.7	1.3	152	7.3	20.85	0.95	32.4	1.7	23.81	0.97	52.23	264.741	35344	902.707
CS-6_17	3.02	0.48	461	12	280.9	6.8	1448	27	6.3	0.7	791	20	2365	53	354.4	7	1777	45	408	14	16.39	0.89	354.8	8.8	46.6	1.4	249.4	6.9	47.6	1.4	118	2.4	15.38	0.56	94.2	3.6	12.35	0.56	44	1.3	11.8	0.49	34.85	262.733	37111.5	920.365
CS-6_18	1.15	0.27	467	18	251.2	7.2	2519	64	0.66	0.2	800	46	2660	130	440	19	2353	87	634	19	25.3	1.2	594	19	80.8	2	442	10	86	2.2	218.9	6.9	28.7	1.1	174.8	6.2	22.92	0.89	116.1	3.5	31.84	0.9	62.28	266.34	35515.3	902.43
CS-6_19	1.69	0.39	447.4	9.2	274.2	5.7	1451	50	0.54	0.16	651	32	1995	83	308	12	1571	46	391	13	16	0.79	352	13	46.4	1.6	249.5	9.2	48.2	1.8	120.4	4.6	15.88	0.72	97.3	4.8	12.62	0.71	42.8	2.1	12.85	0.64	308.77	292.314	36087.3	909.321
CS-6_20	3.78	0.54	515	11	242.3	4.2	3101	95	2.38	0.27	1067	16	3473	60	566.4	9.5	3013	59	798	26	31.6	1.3	712	25	97.9	3.9	537	20	103.1	3.9	263.7	9.5	34.6	1.4	208.1	9.5	26.7	1.1	113	4.1	19.68	0.7	124.23	272.725	35231.5	898.636
CS-6_22	3.97	0.7	515	15	251	6.7	2850	160	3.52	0.48	1122	23	3512	74	562	12	2883	78	753	37	30.9	1.6	661	35	89.9	5.9	489	29	94.2	6.6	242	15	32.2	2	200	15	25.8	2	93	8.2	18.8	1.3	121.59	273.089	36095.8	906.394
CS-6_23	1.15	0.34	375	12	234.7	7.1	2960	150	0.31	0.13	451	27	1687	96	315	18	1840	100	616	34	28.8	2	643	37	90.6	4.9	506	24	100.9	5.2	265	15	35.6	2.1	222	12	29.7	1.8	100	12	39.6	2.5	123.94	273.196	35720.2	902.95
CS-6_24	1.12	0.22	416.6	8.3	231.3	4.5	2757	73	0.5	0.14	623	20	2197	77	387	15	2164	75	652	19	25.15	0.94	625	17	86.5	2.4	483	14	93.6	2.9	240	7.8	32.09	0.92	194.4	5.3	25.3	0.88	101.5	6.3	34.7	0.8	47.09	264.019	34850	896.628
CS-6_25	0.86	0.15	541	14	264.1	5.3	2307	38	0.75	0.19	933	59	2900	160	457	21	2363	84	621	14	24.57	0.85	552.4	9.5	74.4	1.4	406.1	7.6	77.9	1.1	196.4	3.9	25.61	0.54	151.7	3	19.24	0.42	112.4	6.4	30.18	0.81	31.73	261.91	37098.4	918.304
CS-6_26	16.1	2.2	492.2	9.8	248.3	4.7	1431	42	3.61	0.32	419.6	9.1	1375	30	232.9	5.6	1253	32	359	11	14.16	0.64	331	10	44.3	1.4	244.1	8.2	47.3	1.5	117.3	4.7	16.05	0.54	94.6	3.5	12.48	0.52	35.5	1.7	9.09	0.41	231.22	284.368	35882.4	906.834
CS-6_27	0.84	0.14	507	16	260.7	6.3	2897	85	0.85	0.17	1155	52	3620	130	572	16	2932	65	770	16	30	1	669	16	91.5	2.4	505	14	97.7	2.9	246	8.9	32.8	1.3	197.3	7.5	26.2	1.1	172.9	3.1	37.65	0.72	167.72	277.748	35471.9	900.312
CS-6_28	1.61	0.3	461	12	275.1	4.7	2365	48	0.86	0.27	993	68	3090	190	488	26	2460	110	657	21	25.8	1.1	583	16	78.9	1.9	426	9.8	80.4	1.9	203	4.7	25.94	0.63	154.5	3.7	19.5	0.45	122.3	6.7	30.55	0.64	15.15	260.541	35672.7	903.29
CS-6_29	44.9	3.5	506	12	256.4	5.7	1360	29	3.65	0.58	404	11	1329	31	222.4	4.8	1197	26	340.5	9.2	13.8	0.72	319	9.8	42.8	1.1	235	5.7	45	1.4	111.1	3.7	14.92	0.37	89.8	2.5	11.65	0.52	26.81	0.79	5.69	0.34	170.8	278.06	35921.1	907.59
CS-6_30	1.78	0.42	382.6	9.3	232.3	6.7	3980	140	1.16	0.25	711	24	2657	77	487	17	2811	93	911	36	35.5	1.5	900	33	124.4	4.3	703	32	136	6	357	16	47.4	2	288	12	38.2	1.7	167.5	8.4	44.9	2.1	93.33	270.216	36703.7	914.37
CS-6_31	13.1	0.9	462	11	253.1	5.1	1391	52	2.16	0.32	403.3	7.6	1332	20	226	4.4	1221	30	354	11	14.21	0.58	323	13	44.3	1.9	236.3	9.3	46	2	118	5.4	15.45	0.68	92.2	4.6	11.79	0.54	29.4	1.3	8.13	0.37	126.75	272.807	34988.6	898.983
CS-6_32	42.3	1.8	464	11	248.3	5.4	1511	27	0.274	0.088	401	8.2	1362	24	231.6	4.2	1288	22	369.5	7.8	13.93	0.49	347.7	7.9	46.67	0.95	258.3	5	50.3	1.1	125.5	3	17.14	0.43	99.3	2.4	13.08	0.38	26.29	0.59	8.3	0.19	143.56	274.708	35581.8	904.596
CS-6_33	4.18	0.62	416.2	7.8	240.6	4.5	2113	50	2.15	0.33	633	19	2166	64	365.1	9.4	1941	43	537	12	21.55	0.76	488	12	67.2	1.4	369.2	8.9	70.6	1.9	181	5.1	23.6	0.64	144.5	4.2	18.77	0.6	71.9	2.3	17.45	0.54	19.91	260.576	36943.1	918.775
CS-6_34	1.15	0.29	487	14	252.9	7.3	3193	64	1.06	0.21	899	43	3050	120	516	19	2772	85	792	21	31.7	1.2	734	17	99.6	2.5	555	12	107.4	2.5	275.2	7.2	36.4	1.1	220.7	6.6	28.6	1.1	154.7	3	39.29	0.87	155.07	276.582	34675.3	893.735
CS-6_35	1.71	0.35	492	11	257.8	5.2	3571	89	2.14	0.35	1509	40	4820	130	755	19	3841	71	979	22	38.4	1.2	831	18	113.4	2.8	616	13	118.9	3.2	300.2	7.9	40.9	1.6	248.6	6.9	32.7	1.1	191.1	3.3	39.8	1	290.58	291.423	35845	905.151
CS-6_36	0.86	0.18	539	12	254.6	4.8	2310	45	0.44	0.12	686	18	2308	54	388.3	8.3	2095	39	593	11	23.74	0.97	559	11	74.4	1.4	406.3	9.6	79	2	199.9	4.3	25.89	0.76	154.1	4.3	19.97	0.64	85.4	2.7	33.5	1	79.11	267.824	35633.5	904.129
CS-6_37	0.8	0.16	483.9	9.1	264.7	4.8	1970	37	0.48	0.12	841	19	2649	57	418.5	7.4	2121	30	546	9.5	21.02	0.78	477.6	8.9	63.4	1.5	347.6	7.1	66.6	1.5	165.9	3.4	22.17	0.5	132.2	3.4	17.36	0.5	96.7	1.2	26.98	0.44	185.16	279.713	38048.8	928.33
CS-6_38	2.24	0.43	504	13	278	5	1082	29	3.06	0.53	578	14	1766	49	271.3	7.8	1346	36	330	10	12.55	0.58	279.6	8.3	36.9	1.1	194.1	5.5	36.5	1.1	89.9	3.2	11.36	0.35	64.6	2.3	8.05	0.3	20.64	0.82	8.34	0.29	62.5	266.262	35059.2	896.197
CS-6_39	3.97	0.45	503	11	252.2	5.7	1338	24	3.48	0.38	449.6	9.7	1446	30	241.1	4.1	1279	27	352.6	7.3	14.56	0.76	316.3	6.9	41.9	1.1	231.1	4.4	44.1	1.2	110.2	2.2	14.93	0.45	85.8	2.6	11.4	0.35	29.1	0.68	7.48	0.23	188.41	279.66	36193.9	910.769
CS-6_40	1.74	0.33	528	16	269.2	6.5	2429	66	1.71	0.31	1513	66	4360	170	638	19	3051	67	710	17	26.9	1.1	607	16	79.9	1.7	426.1	9.9	80.2	2.5	203.8	5.6	25.95	0.82	156.8	5.8	20.38	0.84	133	4.1	23.68	0.63	111.41	271.058	37113	919.794
CS-8_1	11.17	0.77	711	13	214.4	5.4	491	14	5.05	0.51	1419	26	3162	52	367.8	5.9	1459	26	228.7	5.5	12.22	0.6	157	4.3	18.31	0.61	91.6	3	16.86	0.55	42.6	1.4	5.8	0.27	37.7	2	5.28	0.27	32.89	0.92	9.66	0.25	2280.78	454.603	28423.5	827.891
CS-8_2	4.33	0.68	764	23	260	11	724	62	2.46	0.51	1528	50	3540	170	424	23	1710	100	292	21	14.74	0.87	213	17	25.5	2.3	130	12	24.8	2.5	60.3	6.7	7.87	0.91	49.8	5.7	6.89	0.79	66	11	21.4	2.9	2402.3	462.938	27728.4	818.409
CS-8_3	1.96	0.3	650	13	157	4.8	1114	37	3.7	1.2	1116	26	2914	69	396	9.9	1743	48	350	12	13.92	0.58	269.7	9.5	34.2	1.3	182.6	6.3	35.6	1.4	92.2	3.5	13.22	0.62	87.8	3.6	12.32	0.59	86.6	2.8	30.26	0.99	2950.17	497.648	28422	827.529
CS-8_4	2.07	0.4	700	22	217	10	1113	52	1.14	0.23	1769	66	4270	120	538	11	2278	53	419	13	20	0.68	315	12	38.4	1.5	201.8	8.7	37.7	1.8	95.4	5.6	12.7	0.82	79.2	5.2	11.11	0.67	143	2.7	46.4	1	1245.91	378.046	30385.7	852.246
CS-8_5	21	3.4	704	16	204.6	4	910	23	1.82	0.35	1072	32	2595	76	333.1	8.8	1451	37	288	8	11.93	0.64	221.4	6.5	27.2	0.69	147.2	4.5	28.6	1.1	72	2.7	10.16	0.45	63.7	2.6	8.68	0.42	44	1.8	16.63	0.59	1672.41	411.664	28035.8	823.383
CS-8_6	1.76	0.29	748	23	254	12	1095	34	1.23	0.32	1845	67	4220	120	509	15	2139	50	390	12	16.55	0.92	292	13	36.9	1.4	195.2	7.4	36.8	2	89.7	4.3	12.4	0.67	76.7	3.1	10.22	0.58	123.5	3.3	39.5	1.2	2203.18	449.343	29351.2	837.431
CS-8_7	5.04	0.98	775	36	247	12	847	59	0.87	0.3	1707	92	3870	230	468	28	1960	110	334	23	17.5	1.4	239	17	29.7	2.3	150	11	28.3	2	68.7	5.7	9.59	0.79	58.8	3.4	8.1	0.69	102.3	8.8	32.7	2.8	2583.92	474.717	28810.2	831.353
CS-8_8	1.8	0.27	770	15	214.5	4.8	1121	26	1.05	0.2	1798	37	4219	73	522.1	7.4	2153	30	396.6	7.8	18.55	0.62	290.1	8.2	37	1	193.2	5.4	36	1	92.4	3	12.61	0.47	78.2	2.7	10.63	0.33	129.8	2.1	43.59	0.74	1810.03	422.237	29043.7	834.733
CS-8_9	25	1.7	821	19	294	7.1	572	16	3.22	0.4	1349	34	2932	82	343.2	9.1	1393	36	229.5	7.1	12.4	0.51	162	6.8	18.97	0.75	96	3.5	18.01	0.63	45.1	1.9	6.05	0.28	35.9	1.4	4.75	0.25	25.6	1.1	6.26	0.23	3065.24	505.014	29471	840.242
CS-8_10	15.8	2.2	662	21	141.1	4.4	1129	38	1.88	0.41	1174	33	3006	84	403	12	1766	51	363	15	12.01	0.67	280.3	8.8	36.8	1.3	194.7	8.5	36.2	1.3	90.5	3.2	12.45	0.75	76.1	3.3	10.25	0.52	52.3	2.2	17.23	0.83	2254.9	453.239	31177.4	858.545
CS-8_11	36.5	2.2	549	20	152.6	6.6	1136	43	1.65	0.48	687	20	2025	83	289.4	9.6	1371	47	319	15	10.76	0.59	267	13	35.6	1.1	195.4	9.7	38.9	1.7	99.8	5.4	13.75	0.77	90.2	4.3	12.37	0.64	35.2	1.7	16.47	0.97	1673.11	411.588	30289.2	849.352
CS-8_12	3.3	0.45	703	15	237.2	4.7	908	18	1.37	0.25	1784	46	4180	100	510	11	2122	45	371	8.5	19.67	0.75	271.5	7.2	32.95	0.63	164.9	3.4	30.68	0.86	76	2.2	10.12	0.37	61.2	2	8.38	0.38	130.5	3.9	43.2	1.1	1994.64	435.29	28804.4	832.931
CS-8_13	3.15	0.39	743	21	228.2	7.4	982	25	1.51	0.26	2087	50	4870	110	590	9.8	2435	41	418	10	21.95	0.86	301.4	6.9	36.69	0.95	186.3	4.7	34.1	1.1	84.4	2.8	11.07	0.56	65.3	2.6	8.73	0.42	170.5	3.2	51.47	0.91	2434.07	465.084	27824.9	820.072
CS-8_14	2.46	0.3	747	19	219.5	4.6	1083	31	1.17	0.23	1795	51	4180	100	509	11	2131	41	389	7.8	19.01	0.75	281.9	7.2	34.8	1.1	179.7	5.5	33.7	1.1	83.7	3.1	12.09	0.59	73.6	3.2	9.85	0.44	131.4	2.7	42.6	1	2070.2	440.456	28728.3	830.759
CS-8_15	15.5	1.5	607	17	145.3	3.3	848	21	5.5	1.3	981	18	2555	47	339.9	7.6	1501	34	301.8	9.2	11.02	0.52	232	6.3	29.02	0.85	153.5	5.1	29.33	0.86	72.6	2.7	9.33	0.39	55.3	2	7.49	0.4	46.3	2.1	15.59	0.58	2329.52	457.865	29575.4	841.331
CS-8_16	16.4	1.9	679	15	159.1	3.7	833	27	2.41	0.31	1100	20	2681	56	341.4	7.6	1466	38	277.3	9.1	10.7	0.5	212.5	8.5	27.3	1.2	141.1	5.6	26.7	1.2	68.4	3.1	8.72	0.4	55.6	2.4	7.45	0.41	34.2	1.6	10.66	0.46	2391.23	462.105	27798.1	820.622
CS-8_18	4.16	0.64	754	21	198.3	5.1	1387	50	1.61	0.31	1797	47	4400	120	561	16	2465	60	482	15	20.93	0.79	361	13	44.7	1.8	237.9	7.9	44.9	2.1	113.3	4.5	15.62	0.8	95.6	4.5	12.89	0.77	150.2	8.9	42.1	2.2	2523.36	470.952	30631	851.156
CS-8_19	23.6	1.5	781	20	236.3	8	581	25	2.12	0.37	1171	25	2701	65	328.3	8.9	1348	42	231.6	9	11.61	0.48	164.9	7.4	20.11	0.98	101.2	4.4	19.01	0.88	47.5	2.7	6.4	0.39	40.4	2.4	5.33	0.4	29	1.4	10.09	0.45	2496.32	468.846	29376.7	839.128
CS-8_20	18	1.5	651	14	188.7	3.3	837	20	0.82	0.17	883	16	2260	34	299.1	4.9	1330	20	263	7.2	11.61	0.52	206.3	5.6	26.63	0.73	138.4	3.7	27.15	0.71	70.6	2.3	10.03	0.44	64.3	2.2	8.97	0.33	39.37	0.83	16.62	0.34	1796.99	420.819	29532.6	840.309
CS-8_21	1.76	0.24	725	17	246.9	6.4	787	24	0.35	0.14	1109	24	2602	54	320.7	7.6	1351	41	254.9	7.8	12.14	0.62	186.4	7.5	24.92	0.96	127.1	4.3	24.9	1	63.1	2.7	8.75	0.51	53.8	1.9	7.1	0.33	61.9	2.8	23.62	0.58	2042.59	438.189	31971.8	867.836
CS-8_22	15	1.3	635	18	163	3.2	1148	25	1.88	0.28	1212	26	3202	65	434.3	8.8	1941	38	381.6	9.4	15.33	0.78	298.5	6.8	39.01	0.79	202.2	4.8	37.6	1.1	99.3	2.9	13.69	0.57	84.4	2.3	11.73	0.46	77.7	1.9	24.81	0.73	1914.58	429.578	29920.7	843.638
CS-8_23	3.7	0.46	702	16	210.2	4.9	919	17	0.99	0.2	1669	29	3974	69	490.8	8.5	2052	35	368	7.5	18.98	0.73	264.5	6.4	32.85	0.96	166.1	3.8	31.6	0.89	77.4	2.1	10.44	0.37	63.9	1.9	8.58	0.29	119.3	2.2	38.75	0.81	2006.9	436.007	29842.3	842.52
CS-8_24	4.75	0.37	719	16	156.5	3.3	1088	31	1.41	0.26	1196	30	3048	61	404.8	8.1	1764	35	354	11	13.36	0.53	283.3	9.6	35.8	1.2	188.7	5.5	35.3	1.2	89.5	3.1	11.94	0.51	75.1	3.2	10.19	0.48	82.2	2	24.81	0.62	2941.28	497.21	28622.3	830.321
CS-8_25	13.1	1	743	13	217.5	4.8	862	15	1.03	0.24	1740	29	4006	67	481.1	8	1978	30	332	8.6	17.47	0.64	238.4	5.6	29.02	0.76	150.5	3.9	28.09	0.71	69.6	2	9.27	0.41	57.1	1.9	7.69	0.28	111.5	2.1	35.59	0.69	1793.14	420.377	31306.9	860.238
CS-8_26	9.4	1.8	657	29	180.2	7.3	1358	77	3.85	0.98	1213	46	3200	110	441	20	1936	65	416	29	16.4	1.7	327	18	42.5	2.7	224	19	44.9	2.6	115.6	5.5	16	1.2	99.5	5.6	14.4	1	61.7	3.6	16.6	1.3	1577.51	404.335	29750.2	842.038
CS-8_27	12.94	0.81	637	17	164.9	4.5	875	22	1	0.22	741	16	1935	39	267.8	5.9	1206	31	260.8	6.8	10	0.53	209.8	6.9	26.9	1	142.6	4.7	27.43	0.96	70.9	2.3	9.72	0.39	61.5	2.7	8.64	0.39	36.6	1.1	12.98	0.39	1870.49	425.772	29267.8	837.41
CS-8_28	8.65	0.88	648	15	172.5	3	705	14	3.44	0.42	788	25	2035	53	271.7	6.3	1197	27	241.3	5.7	9.52	0.41	186.1	4.9	23.52	0.63	120.1	3.1	22.63	0.64	59.2	1.8	7.93	0.26	48.4	1.5	6.53	0.3	36.2	1.5	12.2	0.29	1779.82	419.45	31219.3	859.792
CS-8_29	3.37	0.43	713	14	218.2	4.2	712	25	0.85	0.2	1320	30	3110	64	380.8	6.9	1590	26	277.9	7.6	13.8	0.5	197.6	6.3	24.98	0.91	124.3	4.3	23.2	0.86	59.1	2.4	7.89	0.32	51.5	2.3	7.01	0.45	72.6	2	25.39	0.86	1961.83	432.85	29615	841.238
CS-8_30	10.3	1.6	640	13	191.3	4	986	28	1.28	0.18	1747	58	4250	100	534	15	2245	60	391	12	19.83	0.74	286.4	9.1	34.9	1.1	180.1	5.4	33.6	1.1	87.1	3.4	12.32	0.61	82.2	3.6	11.63	0.66	184.4	7.9	57	2	1852.89	425.105	29187.4	835.91
CS-8_31	2.28	0.5	651	19	176.1	5.1	1234	45	1.28	0.25	1579	44	3850	120	493	16	2142	82	400	16	18	1.1	297.6	9.6	38.8	1.9	201.4	9	38.2	1.7	96.4	3.8	13.25	0.81	86	5.3	11.04	0.6	128.6	5.8	41.3	1.8	1608.74	406.561	30570.7	851.663
CS-8_32	6.32	0.68	688	16	167.9	4.7	659	15	0.32	0.13	1055	21	2554	52	320.3	6.6	1362	28	240.2	7	9.98	0.59	173.6	5.3	22	0.6	114	3.4	20.98	0.65	55.5	2	7.84	0.33	49	2.1	6.54	0.34	39.5	1.3	15.64	0.47	1900.37	428.541	28908.2	832.608
CS-8_33	13.8	1.3	737	12	258.4	5.2	544	16	1.88	0.29	1169	16	2696	44	323.5	5.7	1339	26	227.1	6.2	12.37	0.52	163.2	4.7	20	0.56	98.7	3.3	18.16	0.64	45	1.9	6.15	0.25	37.2	1.9	5.07	0.29	32.1	1.2	11.64	0.44	1962.26	432.651	28876.8	833.939
CS-8_34	16.5	1.1	709	18	192.8	4	492	11	1.19	0.22	1062	31	2483	59	298.5	7.2	1231	32	203.8	7.2	9.56	0.5	151.2	5.2	17.93	0.5	91.6	2.5	17.1	0.47	42.7	1.7	5.59	0.23	36.3	1.4	4.94	0.23	37.3	1.3	12.91	0.36	2235.45	451.163	31343.7	859.425
CS-8_35	30	1.5	565	10	137.1	2.8	798	14	0.206	0.078	781	14	2128	36	286.4	4.7	1297	19	256.3	5.1	8.88	0.43	204.9	4.2	26.41	0.64	140.4	3.1	26.9	0.66	69.6	1.7	8.98	0.33	57.5	1.7	7.86	0.29	32.63	0.67	19.29	0.74	1429.85	393.149	32146.9	868.956
CS-8_36	2.63	0.32	756	17	242.7	7	837	25	0.94	0.19	2072	36	4756	88	572	10	2322	40	371.2	7.3	21.59	0.6	260.6	7	30.95	0.95	157.5	4.1	28.86	0.88	73.6	2.7	9.77	0.43	62.4	2.8	8.47	0.41	143.1	2.5	44.61	0.92	2169.32	447.253	29636.4	840.808
CS-8_37	2.79	0.5	689	19	170.8	4.9	1000	32	1.18	0.25	1606	43	3880	100	485	15	2032	63	366	11	15.73	0.59	268	11	33.5	1.2	172.4	5.5	32.2	1.2	83.4	3.2	11.29	0.44	71.2	2.6	9.56	0.47	101.6	6.4	31.3	1.3	2263.29	453.007	30120.2	846.637
CS-8_38	2.32	0.33	725	18	258.1	8.6	674	23	1.64	0.22	941	30	2225	51	281.3	5.3	1204	19	225.1	6.7	10.34	0.5	172.1	6.5	21.82	0.87	110.5	3.9	21.69	0.9	56	2.7	7.69	0.37	48.5	2.5	6.67	0.38	30.32	0.78	13.8	0.37	2328.89	457.818	31339.8	860.29
CS-8_39	4.97	0.62	683	14	167.8	3.6	1062	39	2.55	0.4	1257	54	3190	130	420	17	1833	71	364	15	14.27	0.85	276	11	35.1	1.4	185.3	7.1	34.6	1.4	87.5	3.6	11.62	0.54	74.6	3.3	10.03	0.4	96.5	7	29.4	1.5	1975.26	433.739	29840.4	843.875
CS-8_40	2.04	0.32	708	13	164.9	2.9	1150	28	1.31	0.3	2056	47	4822	77	605.2	9.5	2533	40	440	10	20.67	0.6	314	10	38.7	1.2	200.3	7.5	37.6	1.3	99.4	3.6	13.48	0.51	85	4.1	11.44	0.53	158.5	2.6	49.84	0.88	2210.75	449.49	30792.6	851.97
CS-9_1	8.8	4.2	734	79	97.9	2	5110	130	2.96	0.32	145.6	3.7	480	12	89.8	2.4	632	17	396	11	3.5	0.31	717	21	129.7	3.6	824	25	169.1	4.3	454	13	60.8	2	371	11	49.2	1.6	37.2	2.1	10.92	0.56	130.65	274.049	37069.8	921.837
CS-9_2	0.62	0.25	678	18	95.6	2.8	9480	310	2.03	0.36	312	11	1036	29	199.1	6.5	1413	45	888	25	5.48	0.38	1496	45	267.9	9.4	1667	58	339	12	911	31	120.8	4.3	752	30	101.5	3.9	152.4	8.4	36.1	1.8	322.38	295.321	36500.9	910.727
CS-9_3	9.34	0.74	537	10	101.3	2.6	5109	97	3.65	0.36	170.1	4.5	504	11	91.5	2.6	620	14	413	10	3.44	0.3	742	15	134.1	3	840	18	173.9	3.4	453.1	9.3	59.4	1.3	364.9	9	49.8	1.3	44.1	1.1	10.8	0.28	51.86	264.414	36074.2	909.481
CS-9_4	5.92	0.65	563	12	91.1	2.1	4245	66	0.55	0.16	164.4	4.4	512	13	94.7	2.6	643	15	381.9	9.1	2.66	0.23	651	12	113.1	1.8	695	10	142.9	2.8	369.8	6.1	49.1	1.2	293.3	5.7	39.72	0.76	17.63	0.5	5.92	0.22	188.29	279.668	36147.8	910.896
CS-9_5	0.87	0.26	637	16	94.2	2.5	7460	440	1.06	0.21	371.5	9.2	1217	29	223.3	6.3	1490	42	786	29	5.1	0.43	1211	61	208	12	1278	82	260	17	688	47	93.9	6.9	583	41	78.3	5.6	112.9	5.2	36.6	2.5	233.29	285.126	33419.7	880.957
CS-9_6	2.24	0.26	595	10	87	2.1	6260	110	1.87	0.3	236.1	3.8	767	11	143.5	2	989	18	580	12	3.84	0.28	945	17	165	3.3	1037	19	212.9	3.7	562	10	74.7	1.8	462.8	8.1	62.4	1.4	50.7	1.9	15.61	0.5	49.58	264.499	35688	905.633
CS-9_7	1.27	0.47	622	23	91.8	3.4	8910	300	1.95	0.44	282	18	906	58	167.4	9.9	1165	69	751	38	5.62	0.52	1338	45	246.1	8.9	1550	69	322	14	852	30	115.6	3.9	711	23	96	3.1	133.9	4.7	30.3	1	248.95	286.665	35528.1	903.252
CS-9_8	1.54	0.29	648	14	96.4	2.3	6980	110	2.16	0.29	237.5	7.3	759	21	140.2	4.2	965	25	601	12	4.29	0.25	1037	21	186.5	3.4	1179	24	238.2	4.9	634	13	84.3	1.7	518	10	69.8	1.5	64.2	1.5	18.3	0.4	147.47	276.239	36724.8	916.791
CS-9_9	1.84	0.37	654	19	97.1	3	5880	160	2.57	0.35	302	7.7	934	22	166.6	4.2	1103	28	577	15	3.94	0.27	901	32	157.4	4.5	964	34	195.4	6	511	19	68.2	2.4	424	17	55.2	2.2	48.4	2.4	12.7	0.53	192.59	281.087	36067.3	910.973
CS-9_10	8.3	1	596	15	100.6	2.7	5270	120	1.73	0.32	151.9	4	477	11	88	1.8	625	15	419	11	3.41	0.29	773	21	138.1	3.3	874	21	177.4	4.3	466	12	61.7	1.7	372	10	49.9	1.5	35.8	1.8	10.46	0.35	0	0	36931.8	919.964
CS-9_11	8.76	0.61	587	11	95.3	2	5489	78	2.57	0.41	155.7	3.5	496.5	9.8	94.9	2	669	14	455.6	9.2	3.5	0.25	822	15	146.4	2.7	916	17	186.5	3.3	487.4	7.2	65	1.2	391.8	6.7	51.8	1.1	41.43	0.75	10.7	0.24	132.21	274.296	37246.9	923.433
CS-9_12	2.21	0.59	488	13	93.5	3.7	5220	170	0.123	0.081	112.2	3.3	369	11	73.4	1.9	534	16	394	12	3.69	0.37	745	26	138	4.6	864	26	177	5.2	460	19	60.6	2.4	368	16	49.4	1.9	21.6	1	7.22	0.41	129.93	274.022	36232.4	914.477
CS-9_13	0.74	0.37	579	19	91.1	2.6	5682	89	2.06	0.46	173.6	5.6	574.2	9.8	107.1	3.3	760	25	496	12	3.84	0.44	867	21	150.2	2.6	944	18	189.9	4.2	501	14	67.1	1.4	402	6.9	52.9	1.6	41	1.2	11.79	0.4	177.06	279.214	36062.7	911.586
CS-9_14	0.74	0.19	576	12	92.1	2.3	4780	120	1.2	0.27	141.9	4	446	11	83.6	1.9	578	16	389.1	9.2	3.31	0.34	700	17	127.3	3	782	19	156.8	3.9	418	10	54.6	1.5	335.3	8.3	44.2	1.3	28.4	1.2	8.62	0.38	285.77	290.804	37558.1	926.851
CS-9_15	0.37	0.15	624	17	94.9	3	5530	160	0.72	0.22	307	8.1	948	27	168	3.9	1099	22	540	13	4.42	0.37	822	21	142	4.1	880	24	179.7	5.3	472	17	64.4	2.2	391	14	51.8	2	34.9	1.3	10.18	0.51	192.36	281.023	35643.1	906.803
CS-9_17	0.5	0.19	648	14	88	2.4	6580	150	2.55	0.5	216.9	5.2	694	14	130.7	2.8	896	21	576	12	3.72	0.26	979	20	175.7	3.8	1086	26	221.9	5.4	582	14	77.2	1.9	473	12	64.1	1.8	52.6	1.5	14.43	0.54	36.95	263.92	35584.9	905.657
CS-9_19	0.94	0.21	613	14	104	2.9	4848	99	0.31	0.12	158.8	4.9	484	14	89.4	2.9	622	17	409	12	3.56	0.27	719	16	129.1	2.9	793	17	164.2	3.9	428.9	8.8	57.3	1.6	345.9	7.5	46.3	1.2	30.69	0.94	12.77	0.34	130.67	273.965	39100.8	942.666
CS-9_20	1.14	0.26	629	13	89.1	2.3	3795	97	0.145	0.091	199.5	5.1	591	15	104.8	2.9	696	19	397.2	9.7	2.44	0.26	643	18	105.6	2.7	637	15	126.4	3.4	323.9	8.5	41.8	1.2	257.3	6.9	35.3	1.2	15.8	1.2	9.07	0.46	310.08	293.163	34632.2	893.511
CS-9_21	0.92	0.18	590	16	87.4	2.4	5470	190	3.78	0.49	175.1	4.4	554	14	102.5	3.1	708	21	411	13	3.77	0.33	723	18	130.5	4.3	852	30	183.6	6.6	495	19	67.4	3.3	422	19	57.2	2.4	42.6	2.7	12.38	0.64	286.19	291.195	34659	895.887
CS-9_22	3.65	0.52	616	14	100.2	2.9	4240	120	0.66	0.22	157	4	504	10	93.3	2.1	653	14	391	12	2.22	0.29	647	17	112.2	2.8	688	18	141.5	4.2	363.4	9.8	48.9	1.7	294.4	9.7	38.9	1.1	18.9	1.4	6.02	0.31	252.21	287.837	35352.4	903.289
CS-9_23	0.93	0.2	657	15	88.5	2.1	5818	86	3.35	0.41	372	11	1171	33	209.7	5.6	1355	33	662	13	4.08	0.28	919	17	158.2	2.6	957	16	192.7	3.1	505	9.1	67.9	1.4	423.3	8.3	56.4	1.2	57.88	0.93	14.82	0.31	300.1	292.554	37121.5	921.883
CS-9_25	6.9	1.5	623	24	98.3	3.9	4640	210	2.74	0.61	243	12	729	32	122.5	5.9	799	38	408	15	3.47	0.38	685	23	120.4	6	753	28	153.7	6.3	407	18	53.9	3	333	16	44.9	2.4	31.7	1.7	8.43	0.56	8.82	260.086	35842.2	909.367
CS-9_26	6.31	0.98	561	13	104.1	2.4	5390	130	2.79	0.46	153.2	4.8	464	15	85.8	2.8	607	18	422	13	3.31	0.25	774	22	141.4	3.8	890	23	183.7	4.2	475	12	62.9	1.6	377	10	49.6	1.3	40.6	2.4	11.47	0.48	0	0	45498.7	1002.84
CS-9_27	0.99	0.33	594	20	92.1	3.1	6930	200	1.31	0.37	239	14	758	43	137.5	7.7	947	48	567	24	4.48	0.44	973	35	177.1	4.7	1124	33	232.4	7.6	606	13	83.3	3	512	15	69.4	2.8	91.2	4.1	30.8	1.2	299.61	292.384	36921.2	918.319
CS-9_28	0.67	0.19	616	14	91.7	2.5	5240	100	1.33	0.31	226.1	5.1	693	15	126	3.4	853	19	496	13	3.24	0.25	778	16	138.7	2.9	858	17	173	3.9	447	9	60.6	1.8	369.7	7.2	49.3	1	32.61	0.86	10.01	0.33	84.29	268.904	36939.1	920.567
CS-9_29	0.65	0.17	622	17	97	2.8	8140	220	3.05	0.51	250	10	809	32	155	5.7	1098	38	720	23	4.8	0.32	1231	39	222.7	6.3	1402	37	289.5	7.2	763	22	102.6	2.7	629	20	83.3	2.3	103.7	4.3	24.35	0.9	254.53	287.609	35993.6	911.401
CS-9_30	4	1.3	613	21	91.9	2.3	5060	140	0.41	0.27	215.9	6.5	670	18	121.3	3.7	833	24	479	12	3.19	0.31	767	20	135.1	3.8	827	27	166.7	4.8	434	12	57.8	1.7	354.8	9.9	46.6	1.4	20.7	1	7.82	0.35	84.58	268.907	36547.6	916.818
CS-9_31	10.7	1	601	16	99.6	2.4	4580	120	2.38	0.37	184.7	7.6	565	23	102.3	4.4	706	28	416	16	2.96	0.2	674	17	121	3.4	740	21	151.3	4.7	385	10	52	1.5	317	10	43	1.5	26.6	1.5	7.66	0.37	208.38	282.642	36180.7	912.998
CS-9_32	0.38	0.14	593	15	100.7	1.9	4959	86	0.255	0.097	168.5	3.8	538	12	100.9	2.5	715	17	449.6	8.8	3.09	0.22	756	15	132.3	2.8	819	17	169	3.4	433.2	7.4	57.3	1.3	346.1	7.4	46.98	0.95	23.92	0.61	9.89	0.37	70.96	267.213	37041.4	921.42
CS-9_33	0.9	0.2	682	15	143.3	3.3	2774	60	3.51	0.41	517	11	1661	30	284.9	5.8	1662	35	598	13	6.02	0.35	667	13	96.3	2.1	532	13	100.5	2.5	242.8	5.8	31.73	0.75	189	4.7	26.11	0.67	33.8	1.2	11	0.47	0	0	36777.5	917.878
CS-9_34	5.99	0.81	639	15	99.9	2.1	4641	75	1.91	0.32	150.6	3.8	477	11	90.1	2	628	14	403.5	8.8	2.9	0.21	679	16	121.3	2.7	753	14	153.9	2.9	399.3	7.8	53.4	1.3	323.1	7.5	43.5	1	24.24	0.55	7.16	0.25	407.55	303.456	37383.4	925.404
CS-9_35	1.96	0.3	653	14	90.5	2.3	4739	77	1.15	0.24	189.2	4.5	600	14	112.2	2.4	779	17	475.1	9.9	2.6	0.22	743	16	128	2.8	787	15	159.4	2.4	401.6	7.3	53.9	1.1	328.9	7.9	43.8	1	25.49	0.99	7.73	0.26	161.08	277.147	40035.5	950.507
CS-9_36	0.58	0.18	589	12	99.4	2.6	4623	86	0.95	0.28	310.5	6.8	847	18	137.2	3.1	865	16	431.2	9.4	3.46	0.33	692	15	120.9	2.7	754	17	154.7	3.3	399.9	8.2	53.6	1.4	326.9	6.8	44.96	0.82	30.89	0.79	9.68	0.35	147.1	275.789	37920.5	930.023
CS-9_37	2.17	0.49	585	19	106.8	3.4	5070	120	1.39	0.37	154.1	4.7	509	12	100	2.7	745	20	471	14	3.57	0.39	773	20	133.9	3.2	842	19	170.9	3.8	445	10	59.8	1.8	358.4	9.7	48.4	1.7	35.5	1	10.14	0.4	143.55	275.62	36437.5	914.567
CS-9_38	0.52	0.22	689	28	89.1	5	8080	300	1.33	0.37	475	21	1549	79	282	12	1863	93	921	30	5.56	0.79	1296	37	224.8	9.2	1394	49	282.8	9	744	20	105.2	3.9	653	27	86	3.7	121.2	5.7	31.6	1.3	158.43	277.85	37066.3	920.608
CS-9_39	3.78	0.42	605	12	100.9	2.1	4826	75	0.179	0.076	141.6	3.5	407.5	8.4	70	1.6	481	12	315.5	7	3.24	0.22	622	10	118.5	2.1	769	13	163.2	2.4	420.8	7.4	56.8	1	343.2	6.4	45.23	0.92	18.47	0.42	6.91	0.19	8.21	259.686	36538.3	915.949
CS-9_40	3.11	0.46	599	13	106	2.7	4929	84	0.65	0.16	159	3.1	491.6	9.1	90.4	1.7	631	11	411.3	8.4	3.12	0.2	712	14	129.1	2.5	813	14	166.4	3.1	426.2	7.5	56.1	1.2	340.3	6.2	44.54	0.92	24.55	0.64	8.43	0.26	0	0	36585.1	915.249
CS-10_1	2.06	0.4	860	26	105.2	3	4600	190	1.24	0.34	536	39	1660	110	278	16	1601	89	602	27	9.86	0.72	696	32	113.5	4.9	677	27	141.9	6.1	389	16	57.9	2.4	369	20	50.6	2.2	108.7	6.7	31.6	1	572.84	319.702	36580.9	915.715
CS-10_2	6.5	2.3	987	35	94.6	4.6	5880	220	1.87	0.34	433	14	1417	50	251.1	9.3	1496	70	687	31	6.99	0.66	881	41	146.6	6.3	900	38	187	7.9	515	22	73.8	3.7	470	18	62.9	3.1	111.7	6.5	33.1	2.2	289.1	292.248	37839.8	931.109
CS-10_3	0.93	0.21	793	14	107.2	2.3	5104	85	0.87	0.19	357	16	1270	47	237.3	7	1473	32	629	14	8.46	0.48	794	16	130.7	3	792	16	162.3	3.2	442.5	8.1	63.1	1.4	399.3	9.7	54.4	1.1	99.9	2.7	34.59	0.6	677.88	329.044	36012.5	909.366
CS-10_4	17.9	2.1	675	16	108.1	3	2845	65	2.49	0.37	241	5.5	836	19	153.1	3.2	939	23	385.8	9.4	5.3	0.3	469	10	74.4	2	441	12	91.8	2.4	241.3	7	33.2	1.1	212.2	6	28.9	1.1	30.7	1.2	8.84	0.24	362.73	298.71	35783.7	908.011
CS-10_5	1.51	0.55	888	30	116.5	6.5	4840	190	1.34	0.45	674	22	2117	75	352	13	1984	72	672	30	11.03	0.83	723	30	117.4	5.4	698	33	147.2	6.9	418	18	61.4	2.7	410	18	57.5	2.8	81.3	5.1	25.2	1.3	474.19	309.473	36644.6	912.817
CS-10_6	2.35	0.32	868	16	109.3	2.7	4940	160	3.17	0.46	399	11	1294	37	229.6	7	1403	43	586	22	7.78	0.54	726	28	121.4	4.3	734	26	153.6	5.7	418	15	60.1	2.3	383	16	52.5	2	59.7	5.7	16.6	1.1	247.81	286.344	37778.3	925.153
CS-10_7	14.8	0.99	820	19	102.8	2.4	2526	56	2.8	0.36	229.2	6.6	761	20	136.1	4	809	22	329.6	9	4.37	0.33	403	10	65.7	1.7	384.5	9.2	79.9	2	217.9	5.4	29.91	0.8	189.7	5.6	26.14	0.75	21.63	0.92	6.52	0.22	95.82	268.658	36774.5	914.582
CS-10_8	1.29	0.23	957	20	100.9	2.3	4012	73	0.71	0.17	398.8	7.9	1367	25	243	4.8	1410	26	569	12	6.88	0.32	674	13	106.1	2.4	630	13	129	2.7	344.1	7.1	47.6	1	298.6	6.1	40.96	0.95	94	1.9	37.38	0.75	415.73	303.735	35806.3	906.143
CS-10_9	2.03	0.41	802	24	100.7	2	5850	150	1.23	0.28	296.2	9.3	1064	29	203.5	5.4	1296	31	618	17	7.25	0.59	854	26	146.4	4.2	910	23	190.7	5.3	519	14	73.4	2.2	474	11	63.7	1.9	93.3	7.9	25.6	1.4	398.53	301.901	36493.3	911.566
CS-10_10	1.45	0.24	844	18	103.2	2.1	6290	180	1.6	0.3	393.6	9.9	1399	35	260.2	7.4	1592	47	714	20	8.66	0.47	942	28	156.6	4.9	958	30	198.5	5.6	549	16	77.7	2.3	490	15	66.7	2.2	86.2	5	24.7	1.2	843.36	343.668	36614.6	913.571
CS-10_11	8.1	1.1	782	21	110.4	3.4	3740	120	0.83	0.18	203.4	6.3	712	15	135	3.2	888	18	426	12	4.83	0.43	562	20	95.4	4.2	565	21	119.7	5.3	329	15	46	2.1	288	12	39.4	1.7	43	2.8	12.58	0.83	95.42	269.021	35719.5	905.296
CS-10_12	1.34	0.27	840	19	107.7	2.4	5000	100	0.93	0.18	361	14	1220	38	222.3	6	1362	29	596	12	7.87	0.47	745	14	123.9	2.8	756	17	158.4	3.8	430	10	61.7	1.5	394.5	8.8	53.8	1.5	109.6	2.7	33.96	0.92	200.28	281.026	35756.2	904.489
CS-10_13	1.37	0.2	832	18	107.6	2.2	5350	120	1.26	0.25	357	10	1261	27	234.5	4.6	1433	25	632	13	7.78	0.46	818	16	135.2	2.9	821	18	171.6	4	469	11	66.5	1.8	427	10	58.4	1.6	120.3	3.4	37.12	0.75	156.21	276.085	36115.9	908.264
CS-10_14	1.47	0.19	904	17	117.7	2.1	4690	79	0.88	0.21	804	22	2322	48	363.2	6.6	1940	31	643	11	12.34	0.53	729	15	115.7	2.1	688	13	143.6	2.8	395.4	7.4	56.6	1.2	370.4	8.6	50.7	1.2	85.8	1.6	28.74	0.54	445.78	307.052	34758.6	894.408
CS-10_15	6.9	1.4	834	24	106.6	3.7	3297	85	1.09	0.3	285.5	7.9	998	25	182.5	4.4	1087	25	445	14	6.15	0.43	545	15	86.2	2.2	514	14	105.6	3.1	285.9	8.1	39.4	1.4	248.6	7.1	34.6	1.4	52.3	1.9	18.04	0.63	231.87	284.458	37456.7	922.259
CS-10_16	1.7	0.28	875	17	110.6	2.4	6200	110	1.39	0.26	679	17	2130	45	357	8.7	2040	37	766	18	12.39	0.53	936	19	150.5	3	920	19	190.3	4.1	530.7	9.7	77.1	1.7	509	11	69.1	1.5	157.4	3.3	55.1	1.1	763.26	337.109	33623.5	881.037
CS-10_17	15.5	1.9	814	20	110.2	3.1	2804	57	0.126	0.081	223.1	6.4	753	18	136.9	3.3	833	19	347.5	6.8	4.84	0.39	443.4	9.1	71.2	1.7	427	10	88.8	2.3	241.5	6.1	33.4	1	213.3	5.5	29.5	0.98	16.77	0.73	7.39	0.24	158.1	276.259	36719.6	916.161
CS-10_18	3.57	0.67	834	19	111	2	5067	86	1.94	0.27	283.3	8.8	1072	28	208.1	4.9	1325	29	592	12	7.82	0.34	793	16	129.7	2.3	788	15	163.8	2.9	452.6	9.6	63.7	1.3	409.6	8.2	56.1	1.2	96.8	2	27.78	0.64	375.57	300.264	34002.8	888.146
CS-10_19	1.61	0.5	874	25	102.1	3.8	4930	100	1.21	0.26	355	14	1295	41	239.4	6	1444	45	626	21	7.32	0.54	807	20	128	3.4	764	20	158.7	3.7	438	11	62.7	1.7	402	11	54.5	1.5	53.3	2.3	25.37	0.97	66.47	266.618	34812.4	896.635
CS-10_20	13.2	1.1	838	19	114.1	2.3	3477	76	2.93	0.41	165.6	4.6	577	14	110.4	2.3	733	14	360.8	9.5	4.57	0.42	518	14	88.8	1.9	535	14	112.5	2.6	305.9	7.6	43.2	1.3	266.7	6.7	36.5	1.1	23.94	0.94	7.24	0.31	616.81	323.608	37606.4	924.666
CS-10_21	1.54	0.42	837	26	109.9	2.4	5087	88	0.51	0.16	289	14	1059	46	203.8	7.7	1303	41	602	15	7.56	0.39	797	16	129.3	2.6	788	14	164	3.4	451.3	9.2	63	1.4	401.5	7.5	54.2	1.3	98.1	3.3	36.72	0.99	186.95	280.039	36033.8	909.536
CS-10_22	6.1	1.1	844	17	97.2	2.5	3020	53	1.11	0.18	173.6	5.9	630	17	122.5	2.8	780	15	354.2	7.7	3.82	0.25	464.6	8.4	75.4	1.6	454.7	8.3	95.2	2	262.5	6.1	35.93	0.93	229.5	5.5	30.87	0.76	45.12	0.91	13.05	0.25	156.62	276.304	36132.8	910.164
CS-10_23	14.1	1.6	1060	24	109.7	2.4	3517	66	0.242	0.098	225.2	4.9	776	15	140.8	3.3	864	16	392.7	9.6	4.81	0.4	534	12	88.6	2	538	12	114.9	2.5	310.2	6.9	42.51	0.85	265.7	6	35.74	0.94	24	1.1	10.67	0.32	248.62	286.075	37435.1	922.835
CS-10_24	2.67	0.37	901	14	101.8	3.3	5070	100	0.95	0.22	419	10	1358	27	238.5	5.9	1386	34	585	15	6.71	0.47	773	19	126.9	3	780	16	164.9	3.7	449.4	7.9	63.1	1.7	399	10	53.9	1.5	63.1	1.7	18.36	0.35	335.19	295.587	37622.5	921.488
CS-10_25	1.42	0.41	734	21	95.1	3.2	4619	93	0.49	0.2	182.8	9.5	718	27	144.9	3.8	974	20	489	12	6.97	0.37	677	12	113.4	2.6	701	16	148.6	3.1	411	11	58	1.7	384	11	55.2	1.8	97.9	2.4	29.59	0.81	523.53	314.332	35745.3	905.514
CS-10_26	1.24	0.21	937	22	93.6	2.3	5260	200	1.21	0.2	687	28	2046	76	331	11	1851	62	662	24	10.36	0.52	785	27	126.7	4.8	775	28	162.5	5.8	455	17	67.3	2.5	448	17	60.9	2.3	126.6	5.9	41.3	2.7	429.62	305.024	34836	895.104
CS-10_27	1.99	0.47	738	20	105.6	3.8	4910	160	0.17	0.12	194.1	6.9	758	23	153.8	3.8	1049	29	533	18	6.42	0.53	731	26	123.6	4.6	760	31	161.9	6.3	438	16	61.3	2.1	392	16	52.6	2.2	32.7	1.1	15.71	0.7	66.43	266.198	36135.2	909.415
CS-10_28	26.4	2.2	817	23	94.9	2.9	3052	84	4.24	0.69	279.5	7.8	922	25	161.2	4.1	959	27	397	14	4.68	0.37	524	19	83.6	2.5	494	18	102.5	2.9	279.1	9.2	37.5	1.4	229	5.8	30.8	1.2	39.4	1.2	7.22	0.31	279.38	289.126	36882.3	916.916
CS-10_29	14.45	0.9	761	17	106.1	2.1	3140	51	0.3	0.11	182.6	4.1	681	14	131.6	2.9	838	14	368.4	8	4.62	0.29	487.7	9.7	79.2	1.7	477	10	100.3	2.3	271.9	6.4	37.75	0.77	242.1	5.2	32.87	0.94	24.87	0.68	10.09	0.3	203.2	281.233	36030.5	909.496
CS-10_30	3.73	0.56	864	25	104.4	4	5460	120	1.03	0.21	428	10	1454	31	263.5	6.1	1582	44	666	17	8.79	0.61	856	25	138.6	3.8	845	20	176.7	5.2	486	13	68.1	1.6	441	13	59.4	2.1	98.2	3.4	29.6	1.3	222.47	284.351	37729.6	927.801
CS-10_31	1.85	0.29	832	18	107.2	2	6030	110	1.55	0.25	375	8.8	1337	27	249.4	4.9	1589	25	709	12	8.03	0.42	922	19	151.3	2.5	926	16	194.2	3.8	534	11	76.4	1.5	488	11	67.4	1.2	139.8	2.7	36.92	0.82	428.42	305.028	36379.9	910.909
CS-10_32	3.24	0.48	799	20	97.7	3.4	4470	190	0.99	0.31	283.1	6.3	1054	29	199.5	6.5	1264	38	542	24	6.77	0.59	696	28	114.5	5.1	677	30	144.6	6.2	393	18	56.3	2.4	365	19	50	2.6	71.3	4.3	20.65	0.94	185.4	279.475	36949	916.646
CS-10_33	5.09	0.62	814	17	101.9	2.1	2943	51	0.31	0.13	202	4.4	701	13	130	2.7	827	17	367	8.3	4.16	0.32	466.7	8.5	75	1.7	453.6	7.6	94.5	2.1	258.6	4.9	36.34	0.8	231.3	5.7	31.5	1.1	21.87	0.67	9.99	0.27	477.05	309.49	35873.5	906.509
CS-10_34	16	1.3	783	20	107.3	3.8	2922	64	0.65	0.25	175.8	5	638	16	124	2.9	804	25	356	10	4.1	0.42	474	13	76.4	1.8	456	15	97.9	3	253	6.2	35.8	1.4	225.8	9.9	30.09	0.95	22.4	1.1	8.41	0.44	356.6	297.141	35504.3	902.697
CS-10_35	1.36	0.47	837	19	97.8	3.3	4760	120	1	0.32	400	11	1381	34	249.9	7.3	1492	33	608	16	8.32	0.68	767	23	122.5	3.7	735	16	153.8	3.5	415	11	58.1	1.8	372	11	52.3	1.3	118.8	4.6	35.6	1.2	217.77	282.852	35899.3	905.79
CS-10_36	3.29	0.48	885	31	91.7	2.8	3705	77	0.37	0.11	247.5	6.2	812	20	145.2	3.7	901	22	402.3	9.6	4.47	0.35	554	12	91	1.9	561	15	117.9	3.2	324.3	7.4	46.3	1.2	295.5	8.4	38.91	0.98	33.2	1.3	12.99	0.37	361.87	298.976	35860.3	908.851
CS-10_37	2.12	0.35	885	21	119.4	2.8	3426	75	0.48	0.19	271.9	8.7	919	28	164.9	4.2	1009	28	434	11	5.42	0.33	553	11	87.7	1.7	531	11	110.1	2.3	298.4	6.3	41.77	0.98	266.3	5.8	36.1	1	31.7	1.1	13.4	0.34	310.36	292.444	34509.5	892.174
CS-10_38	10	1.1	852	27	108.7	2.5	3063	60	2.03	0.25	191.8	4.8	627	15	116.6	3.1	754	18	353.9	8.2	4.11	0.35	473	10	79	2.3	481.7	9.3	101.4	2.4	273.4	7	37.9	1.1	231.8	6.4	31.65	0.76	28.82	0.68	9.49	0.26	126.82	272.503	36588.6	913.573
CS-10_39	1.2	0.23	866	17	109.9	2.2	4410	80	0.77	0.2	343.8	9.1	1151	25	206.2	5	1278	26	542	13	6.98	0.38	688	12	110.4	2.4	671	14	139.4	3	382.3	8.1	54.3	1.1	343	7.3	47.1	1	107	3.7	35.61	0.73	570.64	318.86	37633.7	924.532
CS-10_40	38.5	2.7	880	28	126	4.5	3060	100	0.21	0.13	286.6	9.6	967	32	171	6.3	1028	40	409	14	5.52	0.48	525	18	80.6	3.1	476	17	97.9	3.4	258.7	7.4	36.3	1.2	221.8	8	31	1.2	25.8	2.3	13.4	0.81	233.31	284.366	36587.4	913.112
CS-11_1	0.42	0.12	4921	72	84.5	1.7	3428	46	1.98	0.26	1287	19	3577	56	500.2	7.5	2380	38	646	11	9.75	0.46	693	14	108.9	2.1	642.6	9.2	127.5	2	315	6	38.6	0.69	209.2	3.7	25.4	0.58	21.27	0.34	18.22	0.29	624.89	324.103	36271.4	908.229
CS-11_5	0.15	0.13	3880	100	44.1	1.9	5730	120	0.6	0.21	731	22	2394	44	371.4	9.7	1844	45	699	20	7.67	0.37	874	24	164.2	2.9	1045	23	210.6	5	533.8	9.7	67.7	1.4	394.8	9	48.3	1.3	25.55	0.89	35	1.2	170.04	278.196	37851.3	924.518
CS-11_6			6280	160	41.2	1.7	4583	98	0.171	0.081	491	11	1657	37	261.7	6.1	1295	28	630	14	8.92	0.64	747	20	155.9	3.9	958	22	169.8	3.4	430.2	9.5	64	1.7	434.6	9.6	55.4	1.5	20.34	0.62	35.14	0.87	341.1	295.832	36557.1	913.489
CS-11_7			6750	140	41.4	1.2	4940	120	0.29	0.12	519	12	1738	42	274.2	7.2	1385	33	564	15	6.9	0.46	731	18	147.4	3.1	953	23	181.4	4.6	460	14	62.2	1.6	404	10	51.1	1.6	20.6	0.88	52.7	1.4	187.42	279.678	37812.4	925.723
CS-11_8	0.124	0.078	4329	90	41.2	1.4	3766	60	0.158	0.083	401.5	6.9	1445	22	236.9	4.1	1196	21	562	9.9	7.62	0.5	669	12	134.3	2.3	804	15	144.1	2.9	348.2	6.1	46.7	1	291.9	6.2	34.83	0.89	9.64	0.35	24.66	0.7	202.99	281.286	35263.2	900.481
CS-11_9	0.168	0.099	1792	33	83.4	2.3	4694	82	0.42	0.12	589	12	2004	31	324.2	6.1	1721	35	623	11	11.65	0.6	774	16	137.5	2.9	869	20	176	4.4	433.9	8.3	53.2	1.2	301.2	8.3	36.48	0.9	22.24	0.5	36.3	1	3.36	258.271	34548.4	891.964
CS-11_10	0.1	0.12	4040	97	58.6	2.4	4400	110	0.29	0.15	570	18	1664	41	255.9	7.3	1269	34	597	16	15.97	0.72	736	21	152.6	4.5	916	21	166.5	3.6	409	11	58	1.9	375	10	47	1.6	21.44	0.88	45.4	1.3	541.28	317.024	37957.2	928.296
CS-11_11			6150	150	42.3	1.6	4825	92	0.4	0.11	516.4	9.9	1744	35	278.2	6	1381	30	658	15	10.23	0.59	790	19	164.3	3	1000	22	177.1	4	449	10	65.5	1.6	428.1	9.8	53.2	1.2	23.6	1.3	38.3	1.6	508.3	313.366	35606.4	904.26
CS-11_12			2552	87	131.6	3.3	2585	50	0.195	0.076	1186	24	3207	64	445.2	8.3	2114	39	520	10	11.86	0.61	526.1	9.1	79.8	1.7	472.4	9.3	92.9	1.2	230.5	4	28.5	0.72	166.3	4.1	20.89	0.53	17.01	0.71	20.51	0.41	0	0	36561.7	912.375
CS-11_13			3625	77	81.9	1.9	4416	96	0.46	0.11	948	20	2808	58	416.8	8.9	2097	46	641	14	17.73	0.68	752	15	128.4	2.8	797	18	162.6	3.8	411.7	9.1	52	1.2	300.6	8	37.39	0.9	15.2	0.85	54.7	1.2	201.36	281.777	36905	916.742
CS-11_14			5440	120	44.2	1.2	4786	87	0.41	0.14	637	14	1950	41	299.3	6.8	1437	33	667	14	10.57	0.46	806	17	168.8	3.4	1015	20	177.9	4.1	442.6	7.8	63.8	1.5	424.2	8.7	51.9	1.3	23.83	0.8	36	1	507.43	313.155	37327.8	922.034
CS-11_15			7220	160	35.5	1.2	3106	50	0.105	0.053	355.3	5.5	1111	17	169.3	2.7	835	16	393.2	8.1	7.55	0.4	497.3	8.9	102.1	1.7	619	10	112.5	1.8	285.6	5.3	38	0.83	243.9	5	30.5	0.75	8.51	0.25	16.74	0.44	673.79	328.378	39169.5	937.914
CS-11_16			6270	160	46.5	1.2	3988	68	0.14	0.1	385.7	8.3	1379	23	224.9	4.6	1141	19	560	12	9.87	0.5	667	16	138.5	3.1	843	14	148.1	2.8	371	7.6	54.87	0.98	362.9	7.6	44.99	0.85	18.97	0.58	35.84	0.9	549.61	316.768	35547.2	901.171
CS-11_17			2490	71	91	2.2	3214	94	0.057	0.041	971	19	2509	48	345.5	6.3	1613	32	502	11	8.67	0.39	595	13	106.5	2.5	644	16	122	3.8	283.2	9.6	32.8	1.2	166	5.9	18.53	0.75	9.1	0.38	34	1	63.55	265.672	36478.2	912.976
CS-11_19	0.116	0.073	2702	62	90.5	1.9	4780	83	0.53	0.15	629	17	2063	44	323.6	6.2	1678	29	595	10	10.2	0.45	740	13	135.4	2.2	862	16	174.6	2.9	444.1	7.4	56.4	1.2	318.5	6.2	39.8	0.91	22.78	0.84	24.09	0.55	338.25	295.628	36884.8	916.152
CS-11_20			3410	120	57.6	2	5140	170	0.45	0.15	512	19	1748	57	279.1	9.1	1425	47	623	20	12.09	0.64	794	25	167	4.7	1048	29	193.5	5.1	487	16	69.5	2.7	453	17	57	2.5	26.1	1	69.8	2.9	170.52	278.08	35263.8	898.67
CS-11_23			4990	130	38.7	1.3	4379	76	0.114	0.066	456.5	8.6	1597	27	254.8	4.8	1272	21	590	13	7.65	0.65	721	12	146.6	2.9	903	17	164.7	2.7	410.1	7.6	57.1	1.4	357.9	7	44.62	0.88	18.29	0.87	28.7	1	277.22	289.486	36180.1	908.938
CS-11_25	0.121	0.085	5600	100	38	1.4	5436	98	0.34	0.13	595	7.8	2060	37	326	4.9	1581	28	700	10	7.14	0.56	838	17	175.9	3.3	1091	22	203	3.5	517.5	7.2	73.5	1.6	479.2	7.7	59.3	1.1	32.9	0.84	57.4	1.1	520.12	314.149	36452	910.542
CS-11_26	0.27	0.1	3110	58	127.6	2.7	3774	64	0.38	0.11	844	14	2679	46	401.5	7.4	2022	40	620	11	11.31	0.62	729	13	117	2.1	701	12	138.8	2.7	337	5.7	39.02	0.93	201	4.8	24.34	0.65	19.22	0.49	18.13	0.43	475.93	309.924	37882.8	923.681
CS-11_27			4350	110	43.2	1.6	5270	120	0.214	0.092	702	17	2213	57	333.2	7.2	1603	42	594	15	6.21	0.51	754	18	149.2	4.2	947	24	192.8	4.5	493	13	63.8	1.7	374	11	45.4	1.4	17.29	0.72	33.64	0.99	235.38	286.256	34474.7	893.198
CS-11_28	0.264	0.096	2139	54	129.4	2.3	4065	57	0.84	0.17	930	110	2830	210	428	23	2162	74	648	12	21.27	0.9	743	13	120.7	2.4	735	11	150.3	2.7	391.2	6.4	52.2	1	321.4	5.4	44.4	0.97	111	43	29.15	0.61	97.14	270.877	35947.4	908.24
CS-11_29			3753	61	51.8	1.3	5051	76	0.34	0.11	677	11	2052	30	312	5.1	1553	27	564	11	5.84	0.32	726	14	139	2.6	913	15	185	2.9	483.1	6.9	63.7	1.3	379.4	6.6	47.21	0.98	21.51	0.42	44.71	0.7	260.55	287.642	39400.5	939.584
CS-11_30	0.61	0.24	1734	29	186.2	5.4	3347	68	0.62	0.22	817	19	2493	56	394	10	2069	48	656	16	44.9	2.1	727	14	112.8	2.4	647	15	126.4	2.7	300.6	4.8	36.89	0.85	208.7	5.6	27.35	0.84	23.6	1.4	29.05	0.65	466.58	310.061	35987.2	908.993
CS-11_32			4203	90	57.3	1.6	5405	82	0.32	0.11	623.5	9.9	2063	32	320	6	1553	29	681	15	7.41	0.42	835	17	172.4	3.1	1072	18	201.2	3.1	514.1	9.1	72.1	1.6	462	9.5	58.9	1.2	27.18	0.53	45.4	0.99	312.5	294.261	34547.8	894.228
CS-11_33	0.143	0.076	5883	98	40.5	1.1	5402	87	0.7	0.17	648	12	2104	34	324.2	5.5	1552	25	686	13	5.82	0.3	823	15	173.6	3.2	1085	21	200.4	3.2	514.2	9	75.4	1.6	507.2	9.1	63.7	1.3	32.61	0.71	36.71	0.83	451.17	308.445	35193	900.026
CS-12_1	0.09	0.07	4323	78	46.8	1.2	4309	52	0.27	0.1	464.4	6.7	1555	22	248	4	1235	20	567	10	7.77	0.44	705	13	144.3	2.4	892	16	162.8	2.6	404.1	6.6	58.27	0.98	372.6	6.6	46.52	0.78	20.01	0.38	38.71	0.78	218.33	283.204	36607.5	913.87
CS-12_2			4694	96	45.3	1.4	4365	84	0.098	0.058	452	10	1537	36	246.7	5.7	1232	26	542	12	6.9	0.46	695	15	138.9	3.3	869	19	165.7	3.5	410.4	9.6	57.4	1.4	364.3	9.1	45.1	1.2	14.32	0.37	26.19	0.66	189.54	280.31	39214.1	940.385
CS-12_3	0.187	0.095	1971	40	95.7	2.1	3799	52	0.19	0.11	577.7	9.5	1951	28	313.4	4.7	1621	26	539	10	11.09	0.63	650	12	112.8	2.4	690	12	143	3.4	356	7.1	43.6	1.1	244.4	5.5	29.62	0.73	11.96	0.48	22.85	0.47	219.32	283.597	38385.9	931.933
CS-12_4			4403	71	43.7	1.5	6347	93	0.68	0.17	1097	16	3157	45	454.9	7.2	2176	30	746	12	8.86	0.45	948	15	174.2	2.9	1131	18	235.2	3.8	592	10	71.2	1.2	383.2	7.2	47	1	28.48	0.61	32.33	0.7	277.89	289.953	36587.8	911.051
CS-12_5			4881	84	50.3	1.3	4805	75	0.21	0.1	512.2	9.2	1717	29	269.1	5	1345	23	601	11	7.3	0.41	754	16	154.6	3.1	966	14	181.6	3.4	458.1	8.5	65	1.2	425.7	7.4	53.7	1.2	19.68	0.46	44.9	0.91	402.24	302.643	36837.7	917.421
CS-12_6	0.15	0.12	4820	120	45.5	1.4	5870	180	0.63	0.19	624	20	2125	61	337	10	1674	47	717	23	8.77	0.66	924	29	188.4	6.1	1176	37	224.1	7.9	564	17	78.5	2.8	505	18	63.5	2.8	40.5	1.8	61.1	2.1	447.01	307.42	35572.9	902.506
CS-12_7	0.145	0.087	4768	93	43.1	1.2	4904	88	0.242	0.094	548	9.8	1822	30	286.7	5.4	1421	26	602	11	6.3	0.32	773	15	152.8	2.9	960	17	184.1	3.6	462.3	8.5	63	1.3	405.1	7.7	51.17	0.95	21.89	0.53	29.03	0.67	231.98	284.921	35810.5	905.34
CS-12_8	0.171	0.089	3999	93	53.2	1.8	5046	93	0.29	0.11	543	8.9	1825	29	285.4	5.7	1404	23	635	12	7.5	0.41	785	15	162.8	3.1	1025	18	188.7	3.4	481	10	69.9	1.5	469.5	9.1	59.3	1.4	25.63	0.66	29.81	0.71	421.52	305.289	35936.9	908.147
CS-12_9	0.153	0.082	4719	88	50.3	1.4	4617	74	0.265	0.096	515.6	9.6	1722	28	271.5	5	1340	25	597	11	8.25	0.32	737	15	151.7	2.8	940	15	173.4	2.8	439.2	7.8	61.7	1.3	397.2	6.9	49.4	1.1	20.14	0.47	35.91	0.69	294.05	291.291	36381.4	910.488
CS-12_10			4400	78	48.3	1.3	4503	60	0.31	0.12	480.3	6.1	1653	21	264.6	3.9	1306	22	592	11	6.6	0.37	727	12	151	2.5	924	17	168.5	2.4	421.5	7.9	60.4	1.1	401.7	6.4	50.8	1	19.5	0.4	31.09	0.62	158.61	277.45	38244.9	931.439
CS-12_11	0.15	0.11	4666	81	46	1.8	4219	95	0.16	0.13	473	12	1563	30	245.2	6.1	1202	29	549	14	6.65	0.42	688	13	140.7	3.6	857	19	156.6	4.8	402	11	55.9	1.4	372	11	46.9	1.3	16.14	0.74	34.2	1.3	421.43	305.277	36773	917.7
CS-12_12			3358	82	57.1	1.8	3688	68	0.057	0.05	394.4	9.2	1318	27	210.7	4.2	1088	23	457.9	8.2	7.53	0.46	604	13	118	1.8	738	12	139.5	2.4	345.3	6.9	44.8	1.2	272	7	32.7	1.1	12.07	0.29	22	0.54	219.17	283.739	35947.6	909.446
CS-12_13	0.23	0.11	4131	93	45.2	1.3	4644	76	0.187	0.072	487	10	1692	31	269.7	4.7	1322	24	577.9	8.7	6.01	0.33	728	13	147.6	2.3	924	15	173.3	2.9	439.7	7.8	60.9	1.2	386.8	7.6	49	1.1	16.51	0.51	22.9	0.43	495.98	312.339	36580.7	914.796
CS-12_14			4756	99	52.9	1.4	4820	120	0.35	0.13	520	15	1729	44	273.6	7	1365	29	630	14	10.81	0.73	782	17	160.7	3.4	995	22	180.3	4.1	457	12	64.4	1.7	417	11	50.9	1.6	27.6	0.71	36.56	0.94	266.3	288.892	35861.7	908.233
CS-12_15			2972	54	42.2	1.4	3717	76	0.181	0.075	368.8	8.7	1290	29	213.9	4.6	1112	25	524	13	12.02	0.39	671	15	134.4	2.8	803	14	142	3.1	336	7.1	45	1.2	282.6	7.6	33.4	1	28.79	0.59	45	1	343.64	297.044	35397.1	902.711
CS-12_16	0.19	0.12	4709	88	44.6	1.5	4044	75	0.148	0.092	440	12	1465	34	231.1	6.1	1139	25	511	10	7.01	0.49	633	12	130.6	2.5	814	15	149.1	2.9	378.4	9.3	51.6	1.3	339.1	8.8	42.8	1.2	14.28	0.41	21.52	0.56	248.86	287.044	36302.6	912.923
CS-12_17			4230	89	50.5	2.3	4360	110	0.26	0.18	457	15	1567	38	253.7	7	1262	34	582	16	8.76	0.87	724	17	149.7	5	917	22	162.5	5.4	411	13	58.1	2	370	10	47.7	2	23.1	1	36.3	1.3	342.6	296.812	37588.4	925.066
CS-12_18	0.11	0.12	3150	170	53.5	2.2	6540	140	0.59	0.25	586	24	2135	66	358.4	8.5	1870	45	754	17	10.27	0.98	1007	23	194.8	4.6	1225	27	246.7	5.1	605	15	75.9	1.7	449	13	54.1	1.9	36.78	0.91	74	2.7	38.66	263.22	35639.6	905.624
CS-12_19			4697	98	48.3	1.8	5390	100	0.37	0.15	551	12	1894	43	305.1	6.4	1513	33	693	13	10.6	0.65	866	18	177.9	2.9	1108	23	202.3	3.4	505.3	9.2	69.8	1.1	448.8	9.4	56.7	1.6	33.69	0.73	54.3	1.1	174.5	278.75	37921.3	929.944
CS-12_20			4283	95	43.6	1.3	4196	68	0.26	0.085	447.9	8.2	1487	26	238.5	4.3	1160	21	527	12	7.17	0.54	656	14	137.7	2.4	853	16	153.7	3.1	394.6	7.8	55.9	1.1	368	6.7	46.9	1	16.75	0.45	27.59	0.63	235.56	285.695	36515.6	914.416
CS-12_21			4800	88	48	1.4	5052	90	0.54	0.17	531.4	9.6	1827	31	291.1	6	1452	25	627	11	7.81	0.56	788	16	165.7	3.7	1025	19	189.9	4	477	8.6	68.6	1.5	437	11	56	1.5	29.11	0.89	31.1	1	173.54	278.772	35453.7	902.446
CS-12_22			4780	100	45.8	1.3	5060	110	0.56	0.14	549	13	1845	42	289.4	6.9	1416	29	616	14	7.59	0.54	776	16	160.5	3.2	1012	21	187.2	3.7	477.4	9.7	68.2	1.9	449	11	56.9	1.5	24.78	0.8	37.41	0.84	312.04	293.914	35428.8	902.379
CS-12_23			4940	140	46.7	2.2	6060	210	0.79	0.23	634	22	2127	63	339.7	9.1	1685	51	745	27	6.53	0.91	942	38	196.5	6.7	1257	53	228.9	9.7	587	19	87	2.9	554	24	70.8	2.6	45.5	2.8	50	1.8	386.63	301.926	36747.4	915.179
CS-12_24			5114	84	44.2	1.3	4747	80	0.31	0.11	509.7	8.8	1742	30	276	4.8	1376	20	612	11	6.7	0.36	785	15	158.7	2.7	987	17	183.5	3.3	466.6	8.1	63.2	1.1	397.3	6.7	49.6	1.1	30.8	0.69	33.99	0.65	159.06	277.304	38065	929.387
CS-12_25			4580	110	46.4	1.3	5290	120	0.216	0.094	535	14	1858	46	299.3	7.7	1499	32	671	16	10.19	0.62	838	20	172.8	3.6	1085	24	197.9	3.6	502	12	70.2	1.6	454	15	56.9	2.1	32.5	1	54.8	1.3	40.82	262.969	34371.2	894.95
CS-12_26			5158	93	63.9	1.5	4423	84	0.36	0.12	468	9.1	1485	27	234.8	4.3	1187	26	591	14	17.03	0.86	736	18	156.8	3.1	949	19	165.4	2.9	409.3	9.3	59.6	1.5	389	10	48.7	1.2	26.4	0.69	50.3	1.2	233.87	285.443	35791.6	907.045
CS-12_27			4380	120	60.1	2	5460	130	0.46	0.19	607	13	2085	41	332.8	5.8	1704	40	676	18	11.4	1	890	20	175.1	4.5	1093	24	203.6	4.4	494	11	67.9	1.3	424.1	7.8	51.5	1.2	31.1	1.4	45.2	1.9	416.39	304.709	36917.5	918.19
CS-12_28	2.63	0.37	592	16	94.3	2.1	4860	94	3.52	0.48	191.9	5.9	591	15	105.6	2.5	725	17	431.7	8.8	3.02	0.21	726	15	126.9	2.6	798	15	161.4	3.3	415.5	7.6	56.3	1.3	341.6	8.3	45.5	1	30.05	0.77	8.65	0.27	114.51	272.06	36953.6	919.864
CS-12_29			4010	120	51.7	1.2	4070	100	0.173	0.071	416	12	1448	38	235.6	6.2	1210	30	539	12	8.42	0.56	687	15	137.4	2.7	841	19	155.1	3.8	378	10	51	1.7	320	11	38.7	1.3	15.59	0.36	26.01	0.61	265.3	288.793	37156.1	921.278
CS-12_30			4172	79	45.2	1.5	4595	87	0.16	0.1	453.4	9.9	1605	28	257.4	6.4	1292	27	586	13	7.32	0.52	739	16	153.5	3.3	952	21	170.4	4.1	429.4	9.7	63	1.5	421.3	9.6	53.7	1.6	20.19	0.66	39.35	0.94	82.38	268.755	35453.4	902.792
CS-12_31	0.117	0.094	4018	75	51.4	1.4	4770	100	0.26	0.12	550	11	1827	41	282.6	6.6	1384	27	583	14	6.27	0.48	744	18	150.7	3.4	951	25	178	4.6	460	12	63.5	1.9	398	9.3	49.1	1.3	18.31	0.5	29.59	0.8	174.12	279.082	34356.4	891.59
CS-12_32			5100	140	38.1	1.4	4030	100	0.23	0.11	476.9	8.7	1624	35	253.7	6.9	1224	27	543	14	6.05	0.53	662	19	136.6	4.2	839	23	148.6	4	369	10	56.2	1.4	386	12	48.5	1.2	17.04	0.67	30	1.3	710.4	332.808	36847.9	917.483
CS-12_33			4425	76	45.7	1.1	4075	84	0.163	0.072	409.3	9	1474	29	239.5	5.3	1206	26	533	11	7.58	0.43	665	13	137.1	2.8	843	19	152.7	3.4	377.1	9.1	53	1.5	341	10	42.4	1.4	16.52	0.47	36.22	0.92	128.93	273.685	35594.5	906.264
CS-12_34	0.25	0.11	3420	100	217.6	3.9	5030	140	0.39	0.12	632	24	1827	61	284.1	7.7	1484	41	633	15	40.3	3.1	792	20	151.5	3.6	971	27	193.3	5.9	498	15	69	2.1	436	15	57.2	2	21.8	1.1	30.38	0.94	142.79	275.263	35730.1	906.051
CS-12_35	0.18	0.13	4990	130	49.4	1.8	5420	140	0.59	0.19	575	16	1991	52	318.6	8.8	1575	37	703	20	9.1	0.67	866	22	181.6	4.7	1129	24	205.2	5.5	519	14	74.4	2.2	486	11	60.5	2	33.86	0.92	47.9	1.8	220.83	284.075	36131.4	909.731
CS-12_36			3230	170	54.9	2.5	2990	130	0.072	0.048	359	15	1211	51	191.2	7.9	989	41	424	18	8.86	0.41	522	21	103.6	4.4	633	26	114.6	4.6	277	13	37.4	1.6	228	10	28.2	1.3	12.82	0.46	28.01	0.9	0	0	39118.2	943.03
CS-12_37			4434	79	53.7	1.2	4447	68	0.178	0.091	429.5	7.6	1491	23	241.3	4.4	1226	18	533.2	9	10.66	0.42	686	13	141.9	2.3	891	15	167.5	2.8	417.9	7.1	56.6	1.1	352.9	6.6	44.23	0.72	17.26	0.46	37.27	0.73	173.8	278.661	38177.7	929.925
CS-12_38	0.12	0.12	4380	100	52.4	2.1	4703	90	0.41	0.15	486	12	1630	31	257.9	4.6	1307	24	607	17	12.2	1.3	765	15	158	3.4	981	20	177.5	3.4	435.2	8.1	64.2	1.7	405.3	8.9	50.2	1.1	28.92	0.95	56.2	1.4	248.61	286.994	36520.8	914.393
CS-12_39			5050	230	64.8	6.1	5510	490	0.76	0.26	532	51	1850	180	301	26	1540	130	691	51	20.7	2.9	880	69	182	15	1137	96	215	20	525	49	75	7.6	472	49	60.4	6.2	44.9	5.1	51.5	2.3	232.86	285.249	36595.4	915.317
CS-12_40			3770	120	58.5	1.9	4575	82	0.25	0.13	473	13	1687	40	277.7	6.8	1424	32	600	15	8.41	0.65	751	16	148.7	3.5	935	17	173.4	2.9	422.3	8.3	55.5	1.7	339.7	8.7	40.7	1.2	25.35	0.67	56.3	1.2	385.45	301.087	36170.6	910.371
PV-1_1	1.68	0.33	679	20	279.2	6.9	2093	76	8.8	1	2825	99	6280	220	839	31	3910	140	751	27	17.9	1.1	664	27	82.7	3.7	442	17	81.9	3.6	182.1	7.2	20.69	0.91	111.4	4.9	13.58	0.68	74.6	5.8	21.2	1.1	2272.36	454.185	34457.7	886.349
PV-1_2	2.9	0.31	698	14	172	4.2	1356	27	3.75	0.35	2007	39	4495	85	560	11	2539	55	476	10	7.89	0.44	419	10	51.9	1.3	267.4	6.1	49.4	1.2	111.2	2.8	12.55	0.39	65.3	2.1	7.88	0.27	15.12	0.45	6.31	0.21	2294.76	455.469	34565.2	885.892
PV-1_3	2.84	0.41	665	15	275.1	7.7	1658	79	5.67	0.75	2310	100	5170	190	675	29	3120	150	595	29	15.15	0.96	523	27	67.2	3.6	346	17	63.4	3.4	140.7	7.2	16.23	0.95	88.1	5.4	10.45	0.67	46	4.5	13.8	1.1	1727.87	415.639	34679.2	886.491
PV-1_4	2.24	0.32	646	14	242.4	3.8	1144	22	2.12	0.34	1658	27	3787	69	479.1	8.8	2180	41	418.3	9.8	10.47	0.41	360	10	45.7	1	238.2	6.6	44.2	1.2	95.2	3	10.57	0.33	57.3	1.9	7.18	0.34	16.16	0.48	6.48	0.21	1990.33	434.736	35275.4	896.905
PV-1_5	1.31	0.23	697	10	188.6	3.2	1425	24	2.81	0.34	2082	29	4692	70	590.1	8.1	2667	47	505	11	10.03	0.57	429.9	9.5	55	1.2	285.8	5.5	52.2	1.2	115.6	3.3	13.32	0.48	69.8	2.3	8.45	0.38	19.76	0.39	7.53	0.24	2082.59	441.588	34787	892.266
PV-1_6	1.94	0.26	654	12	204.9	4	1253	24	2.03	0.26	1846	31	4162	71	523.5	8.9	2356	40	443	9.6	10.73	0.51	387.4	7.6	48.68	0.98	254.9	6.1	46.8	1.1	102.6	2	11.6	0.36	62.3	1.8	7.73	0.3	15.79	0.48	6.26	0.21	1465.81	395.728	33949.7	883.371
PV-1_7	5.92	0.64	738	13	203.4	3.3	1485	33	97	20	1867	33	4274	74	543	9	2491	41	506.7	9.9	29.2	3.2	480	13	61.5	1.7	314.4	8.6	56.2	1.4	121	3	13.07	0.42	68.8	1.9	8.24	0.32	40.7	2.8	10.63	0.56	1257.38	379.678	35070.4	895.754
PV-1_8	1.6	0.31	686	16	235	5.9	1345	34	2.61	0.39	1931	48	4400	110	555	15	2502	66	484	15	11.58	0.62	416	11	52.8	1.6	278.8	8.3	50.4	1.5	113.8	3.6	12.78	0.46	67.3	2.9	8.31	0.43	22.56	0.65	8.14	0.24	2172.97	447.401	34191.8	885.369
PV-1_9	3.62	0.38	632	13	252.4	6.4	1047	20	1.86	0.26	1536	26	3482	59	438.8	8.9	2016	34	385.9	8.8	10.07	0.4	340.3	6.7	41.76	0.93	217.4	4.3	39.59	0.85	89.7	2.1	9.97	0.35	51.6	2	6.36	0.3	13.46	0.43	5.83	0.2	1226.21	377.052	35966	904.2
PV-1_10	3.08	0.41	636	12	262.5	4.8	1115	23	2.79	0.38	1604	32	3665	74	462	10	2112	48	404	11	10.6	0.42	349.3	8.9	44.2	1.1	227.3	5.5	42.1	1.1	94.5	2.5	10.61	0.34	55.6	1.8	6.6	0.27	15.59	0.51	5.84	0.2	1940.75	431.204	36568	909.709
PV-1_11	0.82	0.16	644	13	257.6	4.9	1344	23	2.95	0.39	1886	30	4316	74	548.3	9.3	2518	40	487	11	11.97	0.52	422.9	8.8	53.7	1.1	278.1	6.1	51.1	1.1	115.4	2.7	13.01	0.36	68.9	2.2	8.34	0.33	23.97	0.6	8.85	0.21	1957.05	432.234	34714.8	891.441
PV-1_12	1.37	0.26	652	14	276.8	5.3	1149	22	2.26	0.36	1676	31	3825	68	484	10	2203	48	430.7	9.3	11.3	0.59	370	9.3	45.8	1.3	239	5.7	43.9	1.1	96.5	2.6	10.93	0.34	56.6	2.1	7.29	0.23	16.96	0.63	6.7	0.2	1928.49	430.319	33263.6	876.216
PV-1_13	1.31	0.32	663	16	223.5	5.9	1752	38	6.02	0.9	2446	45	5400	130	717	15	3299	70	631	18	14.21	0.79	557	17	69.8	1.8	362.6	7.4	67.8	1.3	148.2	4.2	16.95	0.75	90	3.1	10.88	0.69	50	1.7	15.32	0.55	2205.01	449.412	36211.4	907.631
PV-1_14	2.38	0.29	611.2	9.9	189.6	3.5	1229	20	2.35	0.29	1744	30	3961	74	500.8	9.5	2274	43	442	10	9.77	0.42	387.7	8.6	47.8	1	248.8	5	45.9	1.1	103.7	2	11.35	0.37	63.4	1.8	7.2	0.31	18.44	0.79	7.2	0.27	2024.97	437.438	35847.2	903.737
PV-1_15	3.32	0.4	652	14	179.2	3.8	1333	24	2.01	0.36	2048	37	4555	73	562	11	2510	46	478.1	8.6	7.59	0.41	401.3	8.6	51.6	1	269.8	5.2	49.5	1.2	110.8	2.5	12.24	0.4	63.6	2.3	7.77	0.33	14.76	0.42	6.17	0.18	2383.41	461.397	33919.6	884.08
PV-1_16	2.87	0.48	682	15	186.5	6.3	1278	40	25.6	9.7	1891	60	4260	130	533	18	2379	80	464	17	9.67	0.71	396	17	49.4	1.7	258.3	9.3	48.4	1.9	105.2	3.9	12.08	0.64	62.9	2.6	7.44	0.68	18.56	0.7	7.19	0.22	1592.63	405.519	34464.6	889.511
PV-1_17	0.98	0.19	677	14	222.3	6.3	1228	21	2.19	0.27	1801	33	4069	70	513.9	8.9	2337	44	452.4	9.6	10.91	0.54	390.3	8.7	48.3	1.2	252.2	5	46.4	1.1	104.6	2.5	11.68	0.34	61	1.7	7.6	0.28	19.26	0.59	7.33	0.21	1772.5	419.033	35020.4	894.05
PV-1_18	1.95	0.31	684	12	237.7	4.3	1451	29	3.47	0.36	2027	32	4632	68	594	11	2707	46	525	10	12.8	0.47	450	9.7	56.6	1.3	298.7	6.1	54.6	1.4	122.7	2.5	14.06	0.41	72.9	1.6	8.95	0.23	27.09	0.61	9.54	0.22	1923.12	430.675	35611.9	898.282
PV-1_19	2.18	0.45	682	12	208.2	4.2	1058	32	1.52	0.42	1602	43	3632	99	449	12	2027	60	387	13	9.54	0.48	332	14	41.3	1.3	218.3	7.2	40.2	1.3	89.1	3.5	9.67	0.64	51.3	2.5	6.44	0.39	12.71	0.86	5.06	0.21	1542.99	401.813	36052.4	905.11
PV-1_20	1.84	0.28	659	13	179.6	3.8	1379	27	2.08	0.29	2015	39	4558	87	569	11	2573	51	489	12	8.21	0.49	422.1	9	51.7	1.2	274.7	6	50.9	1.2	112.4	2.6	12.41	0.4	66.8	1.8	8.16	0.35	16.76	0.39	6.74	0.21	1542.59	401.518	37169.4	917.43
PV-1_21	2.2	0.32	645	13	258.1	5.1	1096	23	1.87	0.24	1591	31	3628	72	460.5	8.8	2105	43	406.8	7.8	10.41	0.47	354.1	7.3	43.4	1.1	228.2	5.4	41.8	1	93.8	2.3	10.57	0.38	54.9	1.8	6.64	0.29	15.21	0.51	6.15	0.21	1865.9	425.671	33542	879.075
PV-1_22	2.3	0.32	649	13	235.1	6.1	1095	19	2.01	0.35	1623	32	3664	74	461.7	8.8	2105	44	404.1	9.9	9.43	0.49	348.7	7.9	43.8	1	226	5.5	41.7	1.2	93.9	2.4	10.36	0.29	54.1	1.6	6.88	0.33	14.69	0.41	5.94	0.2	2090.48	442.504	35664.6	903.349
PV-1_23	3.6	0.38	635	14	260.8	5.4	1170	30	2.71	0.27	1673	40	3823	83	485	11	2221	49	435	10	11.01	0.51	372.3	9	47.3	1.3	240.8	6	44.4	1.1	99.5	2.7	11.17	0.47	57.8	1.9	7.33	0.28	20.07	0.67	7.64	0.26	1904.27	429.321	36741.5	913.283
PV-1_24	2.9	0.77	651	18	210.8	7.1	1237	35	2.22	0.58	1778	37	4106	99	514	11	2335	46	441	13	10.65	0.74	386	12	47.9	1.5	253.3	7.2	45.5	1.6	105	4.4	11.56	0.47	60.9	1.9	7.7	0.41	18.5	1.4	7.05	0.39	1594.32	406.638	34711.3	886.242
PV-1_25	1.85	0.33	673	15	197.7	4.9	1178	24	1.48	0.23	1741	35	3902	73	490	10	2217	49	426	10	8.63	0.49	365.6	8.4	45	1.1	235.8	5.3	43.6	1.1	96.4	2.7	10.91	0.32	56.9	2	6.97	0.29	13.02	0.39	5.25	0.17	1693.44	412.779	36031.5	905.796
PV-1_26	2.63	0.31	676	14	220.9	5.4	1153	29	1.66	0.27	1695	33	3839	86	487	10	2210	52	422	11	9.47	0.47	357	8.7	45	1.3	234.5	5.8	42.1	1.2	97	2.7	10.72	0.37	58.1	1.7	6.98	0.28	14.37	0.43	5.6	0.21	1373.46	388.579	35331.3	897.599
PV-1_27	1.74	0.38	657	15	263.5	5.9	1058	21	1.66	0.27	1553	32	3508	71	446	10	2058	43	395.8	9.6	10.29	0.55	341.2	7.8	42.7	1.1	221.4	5.3	40.12	0.82	90.8	2.6	10.21	0.44	52.7	1.8	6.39	0.28	14.75	0.34	6.01	0.19	2338.8	458.175	36428.8	908.818
PV-1_28	2.42	0.4	623	14	255.3	6.3	1305	43	5.83	0.55	1837	58	4200	130	541	16	2474	76	475	18	12.43	0.77	420	15	52.2	1.8	271	10	49.1	1.8	111.7	3.7	12.27	0.55	63	3.2	8.11	0.48	24.1	1.5	9.09	0.39	1874.83	428.582	35823.7	907.966
PV-1_29	2.81	0.37	682	14	191.6	4.5	1420	26	2.45	0.27	1990	40	4490	88	570	13	2580	54	493	13	8.24	0.39	430	10	54.1	1.4	279.5	6.1	51.8	1.1	117.2	2.8	13.05	0.32	68	2	8.42	0.31	18.38	0.48	7.12	0.2	1216.57	377.044	35186.9	897.878
PV-1_30	2.71	0.5	621	24	206	9.9	1169	30	2.01	0.42	1706	37	3844	86	492	13	2231	54	422	15	9.67	0.81	376	18	46.5	1.4	243.1	8.1	43.6	1.6	99.9	3.4	10.93	0.55	57.1	2	7.39	0.64	17.05	0.51	6.5	0.42	2324.61	459.801	35839.3	908.175
PV-1_31	2.73	0.42	649	14	224.6	4.8	1098	20	1.59	0.21	1638	30	3667	70	463.7	9	2100	38	400.8	8.8	8.86	0.43	342.7	7.8	42.58	0.99	224.1	5	40.8	1.1	92.2	2.1	10.04	0.34	54.6	1.7	6.81	0.26	13.12	0.33	5.53	0.19	2263.52	455.678	35036.3	899.697
PV-1_32	2.72	0.34	681	13	181	3.9	1324	22	2.88	0.85	1959	36	4404	81	553.3	9.7	2492	44	472	11	8.76	0.42	401.9	9.5	50.7	1	266.2	4.8	48.7	1.2	110.4	2.4	12.45	0.37	64.4	1.4	8.13	0.34	16.93	0.4	6.64	0.16	1538.59	403.735	34521.7	893.815
PV-1_34	1.82	0.33	685	13	183.6	4.1	1472	27	2.95	0.4	2078	36	4719	76	596	11	2689	47	508.2	8.7	9.44	0.45	452	11	55.9	1.1	295.6	6.2	54.4	1.3	123.5	3.1	13.39	0.54	75.3	2	9.14	0.4	23.39	0.81	8.77	0.31	1458.59	397.276	35407.3	904.784
PV-1_35	1.99	0.46	669	16	205.9	6.2	1174	38	3.07	0.47	1746	58	3930	120	497	14	2252	74	430	14	9.07	0.58	374	13	45.8	1.4	239.6	8.8	43.1	1.7	98.7	3.8	10.92	0.41	57.8	2.6	6.9	0.32	14.51	0.54	6.58	0.28	1849.25	425.549	34446	892.034
PV-1_36	1.3	0.26	686	14	196	5.3	1295	31	1.91	0.3	1891	44	4280	100	541	12	2427	64	458	11	8.57	0.54	398	12	49.9	1.2	263	7.6	47.9	1.6	108.2	2.7	11.74	0.43	62.9	2	7.96	0.33	15.91	0.53	6.39	0.21	1555.16	403.968	34055.8	886.97
PV-1_37	1.57	0.22	644	12	212.8	4.6	1174	25	2.54	0.35	1716	35	3858	83	495	12	2242	50	426	11	9.97	0.51	374.3	9.4	46.9	1.3	243.7	6.4	44.4	1.4	98.9	2.6	11.2	0.31	58.3	1.9	7.13	0.31	17.14	0.52	6.66	0.25	2385.78	462.601	34381.3	890.833
PV-1_38	2.23	0.28	643	12	271.6	4.5	1141	16	2.11	0.25	1613	26	3678	57	473.5	7.3	2164	37	414	10	10.89	0.51	360.1	7.9	45.9	1	236.4	4.7	43.26	0.9	98.8	2.3	11.05	0.33	56.8	1.7	7.07	0.29	18.15	0.46	7.05	0.21	2465.67	469.23	36673.6	916.906
PV-1_39	2.28	0.26	670	11	247	4.6	1301	20	4.17	0.66	1856	27	4255	61	544.3	9.2	2466	40	469.6	9.3	12.09	0.48	418.1	9.2	51.94	0.94	272.5	5.7	49.58	0.97	112.6	2.3	12.52	0.41	65.4	2	8.2	0.29	23.69	0.69	8.8	0.25	2272.98	455.119	35491.9	902.545
PV-1_40	3.68	0.4	629	11	188.8	3.4	1171	14	3.77	0.26	1758	21	3929	50	499.8	6.3	2238	29	423.1	7.8	8.89	0.42	370	7.1	46.03	0.87	239.9	3.7	43.55	0.76	97.8	2.1	10.94	0.28	56.8	1.8	6.96	0.23	15.92	0.33	6.31	0.21	1634.81	409.987	35276.4	899.718
GV14JAW182_1			2101	34	109.6	1.7	2536	28	0.02	0.023	256.2	3	793	10	126.8	1.7	694	11	258.3	5.7	5.46	0.29	340.4	6.2	66.7	1.1	449.3	7	92.5	1.5	242	3.7	32.67	0.64	203.5	3.6	27.14	0.63	0.284	0.034	16.69	0.38	666.16	240.829	36211	652.931
GV14JAW182_2			1210	24	116.2	2	1478	16	0.064	0.039	155.8	2.2	484.5	5.2	78.7	1.2	441.3	7.2	175.2	2.7	6.33	0.33	240	3.7	45.97	0.75	287.3	4.6	54.22	0.78	124	2.2	14.4	0.34	76.1	1.6	8.81	0.24	0.586	0.055	14.39	0.25	616.93	237.47	36751.6	657.15
GV14JAW182_3			2011	36	111.9	2.3	1461	20	0.068	0.041	186.9	2.8	630.5	9.5	107.9	1.4	613	12	228.6	4.4	6.35	0.3	274.3	3.7	50.72	0.89	308.8	4.6	54.92	0.97	126.7	2.4	15.19	0.37	85.7	2.3	9.97	0.29	0.927	0.057	28.92	0.51	378.11	220.912	36634.6	655.9
GV14JAW182_4			1713	41	117.5	3.1	1085	25	0.057	0.052	99.1	2.3	488	11	101.7	2.7	660	19	305.2	8.5	6.92	0.55	430	12	71.2	2.4	328.4	8.4	35.8	1	39.8	1.7	2.33	0.18	10.31	0.75	0.815	0.087	2.26	0.13	39.3	1.2	872.35	254.121	35564.9	648.303
GV14JAW182_5			2201	36	97.7	2	1197	15	0.007	0.014	307.2	4.3	936	14	143.9	2	750	11	253.7	4.4	4.96	0.22	284.1	5	48.95	0.79	278.3	4.4	45.79	0.87	92.7	1.9	10.15	0.28	51.1	1.5	5.5	0.17	0.115	0.018	13.4	0.24	979.22	260.888	35540.2	648.139
GV14JAW182_6			2064	42	94.1	1.7	1359	22	0.025	0.025	141.6	2.7	477.2	8.2	79.5	1.5	443.1	9.7	178.6	3.5	4.89	0.22	221.3	4.6	42.1	0.8	267.9	5.3	49.7	1	120.5	2.3	15.8	0.35	91.7	2.4	10.69	0.32	0.578	0.039	25.83	0.65	1827.08	308.545	35929.1	650.848
GV14JAW182_7			1975	34	119	2	1373	22	0.015	0.022	104.2	1.9	505.6	8.6	104.7	2.2	665	11	285.2	4.9	5.83	0.38	373.8	9	62.9	1.4	332.9	7.5	49.8	1.1	82.6	1.8	6.3	0.25	25.43	0.76	2.79	0.12	2.45	0.1	29.04	0.68	1041.54	264.668	36051.7	651.602
GV14JAW182_8			2118	29	108.8	2.2	1405	18	0.029	0.028	147	2.2	493.7	7.1	84.4	1.5	479.5	9	197.6	4.8	6.08	0.35	250.5	4.5	47.94	0.76	302.4	5.1	54.25	0.86	122.2	2.5	14.93	0.41	86.5	1.9	10.54	0.32	0.72	0.049	20.21	0.39	587.21	235.56	35535.1	647.914
GV14JAW182_9			1862	28	96.6	1.8	1377	19	0.04	0.031	144.4	2.2	543.8	8.4	98.2	1	561.1	9.2	214.1	3.6	5.34	0.22	251.1	4.2	45.24	0.81	280.8	5	50.64	0.87	118	2.1	14.75	0.25	84.6	1.8	9.4	0.27	0.099	0.017	15.05	0.29	417.97	223.797	35420.2	647.476
GV14JAW182_10			1357	24	119.6	1.7	1404	18	0.057	0.035	189.1	3.1	538.1	7.9	84.7	1.4	463	8.3	178.3	4.1	6.68	0.25	237.3	4.4	45.53	0.96	293.3	4.4	52.01	0.77	119.7	2.1	13.81	0.42	77.1	1.7	8.81	0.24	0.638	0.039	13.41	0.26	457.19	226.44	35988.5	651.467
GV14JAW182_11			1892	52	89.4	3.8	1914	58	0.18	0.13	195.4	6.8	722	21	127.2	4	728	31	292	13	6.9	0.42	343	11	64.2	2.5	402	19	72.9	2.4	172.4	6.8	21.97	0.97	124.5	5.2	13.95	0.65	2.43	0.2	56.6	2.5	586.25	235.431	36892.5	657.51
GV14JAW182_12			1352	21	116.8	2.4	2806	40	0.043	0.034	363	5.6	1088	16	169.7	2.5	921	15	326.9	5.9	5.78	0.2	429.7	7.7	80.8	1.3	510.9	8.7	95.6	1.5	214.4	3.6	23.35	0.53	111.6	2.2	12.08	0.36	0.192	0.022	16.11	0.33	777.59	248.154	36485.7	654.84
GV14JAW182_13			2075	41	94.8	1.9	2202	36	0.06	0.042	192.5	3.7	616.5	9.9	102.3	2.1	574	10	217.1	5.8	4.72	0.25	290	6.3	56.7	1.2	381.1	6.8	79.6	1.5	209.2	4.1	28.17	0.63	176.5	4	22.13	0.64	0.537	0.042	23.19	0.49	763.58	247.247	36396.7	654.269
GV14JAW182_14			1645	28	117.6	2.3	1341	19	0.007	0.014	102.8	2.1	488	7.2	95.9	1.7	571.4	9.1	231.9	3.9	6.42	0.37	283.5	6.6	49.36	0.76	287.6	4.8	49.95	0.89	112.4	2.4	12.57	0.39	54.7	1.6	6.81	0.25	0.102	0.021	21.34	0.42	903.75	256.047	36272.7	653.646
GV14JAW182_15			1311	22	113	2.4	1714	21	0.06	0.039	166.5	2.6	541	7.8	90.8	1.4	516	7.7	203.4	4.2	5.56	0.27	273.9	5.3	51.8	0.93	334.4	5.7	63	1.2	142.7	2.4	16.12	0.39	84.4	2.2	9.57	0.28	0.457	0.042	14.64	0.41	585.34	235.439	36078.9	652.193
GV14JAW182_16			1902	31	99.8	1.8	1421	22	0.013	0.019	150.9	2.4	500.9	7.6	82.9	1.6	473.8	9.2	187.6	4.2	5.52	0.26	245.2	5	45.27	0.86	288.6	4.7	53.19	0.96	127.9	2.5	16.28	0.37	92.9	1.9	11.12	0.33	0.927	0.044	27.99	0.54	561.52	233.785	35491.2	647.91
GV14JAW182_17	0.16	0.17	1416	47	111.8	3.3	1459	56	0.23	0.19	151.5	8.3	521	18	88.8	4.3	525	21	191.8	9.6	6.31	0.62	239	10	49.3	2.9	317	19	56.1	3.5	133	7.8	17.16	0.85	109.2	5.3	13.2	1.1	1.14	0.16	17.5	1.2	474.44	227.724	36552.4	655.676
GV14JAW182_18			2252	42	102.7	2.1	3300	40	0.02	0.023	399.6	8.6	1193	21	185.2	3	976	16	341.3	7	5.6	0.27	454.5	8.7	89.1	1.6	598.9	9.4	114.1	2	255.4	3.8	26.98	0.61	126.1	2.4	13.95	0.31	1.58	0.064	42.79	0.72	938.93	258.42	35369	646.368
GV14JAW182_19			1389	17	114.2	2.2	1316	19	0.065	0.042	143.5	2	462.3	7	75.2	1.5	409.6	9.2	160.5	4	6.56	0.34	222.8	4.9	42.1	1	268.5	4.8	48.85	0.96	110.2	2.3	12.9	0.31	69.3	1.8	7.8	0.29	0.888	0.06	16.21	0.46	370.7	220.296	37002.1	658.378
GV14JAW182_20			1443	38	117.3	4.1	1484	46	0.021	0.043	446	13	1342	42	206.8	6.4	1052	34	353	11	7.19	0.37	397	12	66.3	2.5	356	11	56.1	2	108.2	3.6	10.79	0.56	46.1	2.4	4.31	0.25	1.35	0.19	33.8	1.7	897.58	255.697	35777.2	649.926
GV14JAW182_21			1549	26	113.3	2.4	1574	22	0.04	0.031	171	2.7	542.2	8.1	89.9	1.4	510.2	9.8	197.1	4.1	6.28	0.29	268.3	5.8	51.55	0.97	324.6	5.4	59.1	1.3	129.8	2.7	14.2	0.37	72.9	1.9	8.07	0.27	0.509	0.038	14.05	0.34	482.24	228.308	35665.6	648.987
GV14JAW182_22			1319	25	115.7	2.3	1756	25	0.157	0.063	194.3	3.2	593.8	9.5	95.9	1.8	519.3	7.8	212.4	4.7	8.05	0.29	289.8	5.3	55.9	1.1	351.1	4.3	63.71	0.97	140.3	2.3	15.02	0.4	77.2	2.2	8.43	0.29	1.604	0.079	32.35	0.44	345.81	218.496	36154.4	652.639
GV14JAW182_23			1729	27	115.2	1.9	1343	17	0.036	0.035	220.8	3.3	724.8	8.9	120.5	1.8	660	10	242.5	4.9	6.32	0.3	301.4	6.7	52.69	0.99	299	4.4	49.48	0.96	101.7	2	10.97	0.25	54.2	1.5	6.04	0.24	0.776	0.058	20.23	0.35	496.89	229.314	35544.7	648.647
GV14JAW182_24			2052	35	106.7	1.8	2552	38			224	3.2	725	11	120.8	2.2	670	12	255.6	5.1	5.08	0.29	340.1	5.5	66.6	1.2	453.6	7.8	92.8	1.5	233.2	3.7	29.47	0.72	171.4	3	21.69	0.41	0.375	0.035	15.32	0.32	778.36	248.129	36143.6	652.069
GV14JAW182_25	0.14	0.14	1824	54	113.2	4.5	1338	42	0.046	0.062	207.2	4.7	659	21	109.8	2.6	596	12	229	10	6.59	0.65	280.3	7.1	49.6	1.4	295	7.3	49.9	1.7	108.7	4.6	12.05	0.3	69.6	4.1	7.75	0.44	0.663	0.096	18.34	0.76	529.28	231.597	36380.5	654.376
GV14JAW182_26			1886	29	112.5	2.2	1800	28	0.032	0.031	244.3	3.7	778	11	127.5	2.2	707	11	251.6	5.5	5.64	0.25	318.2	5.9	59.37	0.92	363.3	5.4	67.5	1.1	149.8	3	17.36	0.45	89.4	1.8	10.68	0.28	0.463	0.036	15.78	0.31	697.26	242.78	35530	647.854
GV14JAW182_27			1962	29	114.8	2.2	2232	41	0.026	0.025	220.4	3.9	675	11	108.2	2	612	12	227.5	5.6	5.87	0.31	307.5	7.6	61	1.2	410.1	8.4	80.5	1.7	197.2	3.5	24.05	0.56	135	3.5	16.22	0.44	0.182	0.03	11.05	0.23	595.11	235.965	36548.6	654.861
GV14JAW182_28			1155	35	112.3	3.6	1301	29			130.1	3.3	457	11	79.9	1.7	471	13	192.6	6.4	5.72	0.46	258.7	7.7	46.8	1.6	278.9	8.8	47.2	1.3	99.7	3	10.26	0.4	47.9	2.2	5.17	0.31	0.274	0.047	13.46	0.45	586.29	235.469	35109.9	645.315
GV14JAW182_29			1336	25	117.3	2.3	1327	19	0.007	0.013	169.4	2.6	545.5	8.1	91.5	1.7	518.7	8.1	193.5	3.2	5.73	0.29	246	5	44.63	0.76	275.8	4.1	49.97	0.97	109.6	2	12.11	0.3	58.6	1.3	6.62	0.2	0.215	0.031	10.36	0.23	617.35	237.513	36244.3	653.396
GV14JAW182_30			1780	33	116.2	2.2	1356	21			159.8	2.9	498.8	8.3	81.2	1.5	442.8	7.4	171.1	4.4	6.71	0.34	210	4.4	41.85	0.95	277.7	5.3	52.8	0.88	131.3	2.4	18.16	0.5	117.5	2.3	15.36	0.39	0.788	0.055	17.02	0.36	305.86	215.615	35996.7	651.799
GV14JAW182_31			2594	47	102.3	1.8	2858	43			99.8	2.1	428.5	7.1	82.1	1.8	500.6	9.6	217.5	4.2	4.92	0.32	313.3	5.1	64.5	1.2	463.4	9.3	99.6	1.8	267	4.5	35.4	0.64	212.8	4.1	25.99	0.67	0.578	0.05	38.84	0.75	1401.52	285.61	33757.3	634.292
GV14JAW182_32			2031	32	117.9	1.7	1512	20	0.048	0.034	141.3	3	548.9	8.9	100.8	2	587	11	227	3.6	6.4	0.29	290.2	5.7	52.54	0.97	322.3	4.8	56.9	1.2	124.8	2.2	14.68	0.32	78.1	1.9	8.83	0.24	0.094	0.029	12.8	0.28	873.69	254.195	34992.3	643.961
GV14JAW182_33			1494	30	108	2.1	1853	32	0.046	0.035	142.6	2.2	489.8	8.3	86.3	1.7	517.5	9.4	225.3	5	5.86	0.25	320.6	6.8	60.2	1.3	365.5	7.3	65.2	1.3	142.4	3.3	15.38	0.36	76.7	2	8.49	0.25	0.135	0.022	9.95	0.26	577.95	234.896	36783.2	656.986
GV14JAW182_34			1495	23	116.5	2.2	1712	25			163	2.7	524.1	8.3	88.3	1.8	495.1	9.5	193.8	4.2	6.32	0.34	267.3	6	51.1	1.1	337.2	6.7	64.2	1.2	152.5	3.1	18.47	0.5	101.2	2.2	11.89	0.35	0.51	0.051	13.45	0.35	570.69	234.372	35695.6	649.122
GV14JAW182_35			2019	37	107.7	2.4	1401	19	0.09	0.045	162.3	2.4	500.1	6.7	79.8	1.3	427.5	6.8	162.1	3.2	5.61	0.33	206.8	4.1	39.33	0.68	262.4	4.8	51.5	1	135.9	2.4	20.25	0.39	136	2.6	18.81	0.46	1.319	0.068	36.75	0.6	1456.89	288.64	34660.9	641.317
GV14JAW182_36			1102	23	104.6	2.1	1374	30	0.102	0.075	156.1	3.7	480.1	9.9	78.4	1.6	436	11	181.4	5.3	5.11	0.5	252.7	7.8	47.7	1.1	280.4	5.4	48.6	0.81	101.9	2.1	10.66	0.54	46.5	1.6	5.13	0.25	0.519	0.049	15.75	0.37	616.73	237.472	35800	649.973
GV14JAW182_37			1535	25	120.9	2	1361	18	0.053	0.037	174.2	2.5	600.2	9.3	102.3	1.5	589	11	221.3	5.4	6.53	0.31	276.5	4.6	49.72	0.86	292.9	5.8	51.02	0.95	115.4	2.3	13.74	0.37	73.4	1.8	8.24	0.29	0.574	0.037	16.38	0.34	841.11	252.234	35248.6	645.767
GV14JAW182_38			2810	51	101.2	1.8	2571	36	0.218	0.077	97	1.8	397.1	6	73.3	1.3	431.2	6.9	188.7	3.8	5.1	0.25	263.6	5	56.1	0.87	411.4	6.5	88	1.5	252.3	4.2	38.84	0.77	258.4	4.1	34.36	0.72	0.612	0.054	37.3	0.77	1279.29	278.555	34183.8	637.53
GV14JAW182_39			1286	24	117.3	2.2	1452	24	0.091	0.053	178.9	2.8	529.9	9.1	83.6	1.4	456.1	8.3	178.1	4.3	7.11	0.33	240.5	4.8	48.15	0.89	303.8	6.2	54.4	1.1	116.4	2.4	12.78	0.37	68.3	2	7.86	0.31	1.115	0.054	16.26	0.36	488.64	228.703	35317.2	646.479
GV14JAW182_40			2087	39	114.5	2.1	1579	27	0.071	0.04	160	2.8	508.9	9.8	84.9	1.6	478.8	8	202.1	4.7	7.06	0.33	280.6	5.5	53.6	1	331.2	6	58.1	1.3	123.5	3.1	13.29	0.32	65.9	1.6	7.43	0.22	0.694	0.044	22.33	0.51	529.75	231.649	34942.3	643.868
GV14JAW183_1	0.41	0.11	281.8	4.8	98.2	1.9	1216	19	0.68	0.13	1704	26	3949	62	485.3	8.4	2125	33	424.2	8.1	17.19	0.47	378.3	7.7	48.79	0.91	259.6	4.8	48.59	0.97	110.1	2.8	12.56	0.36	84	2.5	8.57	0.3	21.69	0.68	3.09	0.11	42.03	194.97	37056.4	659.364
GV14JAW183_2	1.06	0.25	179.9	4.6	108.8	2	3406	44	0.81	0.19	5100	67	11450	170	1371	23	5957	97	1146	20	26.07	0.82	1052	15	140	2.7	762	12	143.9	2.5	343.2	5.7	40.8	0.86	229.3	4.6	28.44	0.69	147.9	3.2	15.87	0.36	65.46	196.849	36957.9	657.833
GV14JAW183_3	0.346	0.096	288.5	5.2	39.8	1	5482	85	0.35	0.12	2626	42	7350	120	977	16	4465	73	1012	19	7.42	0.33	980	19	154.1	2.7	916	16	184.1	3.3	471.4	9.1	60.7	1.2	348.1	6.2	42.65	0.83	83.1	1.6	10.43	0.27	10.88	192.345	41474.3	689.66
GV14JAW183_4	0.59	0.15	315.8	7.7	28.42	0.85	6420	150	0.145	0.089	1161	21	3317	65	503.3	9.9	2595	55	805	20	5.38	0.31	975	24	166.1	3.5	1039	24	213.8	4.1	559	10	73.6	2.1	430.1	9.1	53.5	1.4	53.1	1.9	6.92	0.33	18.68	193.09	37157.2	659.872
GV14JAW183_5	0.66	0.17	351.5	8.7	90.6	2	3837	92	4.59	0.56	5590	110	12470	240	1469	27	6400	140	1220	24	34	1.2	1123	23	147.1	3.1	784	21	147	2.8	334.6	6.9	38	1	203	5.8	24.82	0.65	165.5	5.1	19.25	0.51	122.03	201.354	37790.5	663.998
GV14JAW183_6	0.64	0.3	325.8	7.1	124	3.1	7270	180	0.4	0.2	3571	66	8530	170	1060	18	4713	90	1059	25	6.69	0.42	1067	25	181.3	3.5	1162	28	243.9	5.5	648	17	87.3	1.9	508	13	61.8	1.3	96.8	2.5	11.83	0.49	283.1	213.841	37072	658.703
GV14JAW183_7	0.64	0.16	310.2	6.4	89.5	1.8	3526	62	5.69	0.4	4443	78	10240	170	1250	21	5595	97	1103	20	29.42	0.76	1036	20	135.8	2.9	728	14	135.7	2.8	308.9	6	34.79	0.78	184.9	3.9	21.97	0.52	113	2.4	13.88	0.35	34.23	194.32	39307.2	674.423
GV14JAW183_8	1.07	0.27	416	11	64.2	2.4	4520	130	9.05	0.81	5540	150	12920	380	1592	50	7230	230	1418	46	26.7	1.2	1337	39	174.9	4.7	945	32	175	5.4	395	12	44.9	1.5	230.6	8.3	27.3	1.1	168.6	5.7	18.23	0.57	155.41	203.945	38464.1	667.206
GV14JAW183_9	0.34	0.23	377	18	86.8	3.7	4840	220	9.64	0.99	5920	260	13530	570	1672	73	7410	350	1458	64	37.7	2	1381	62	184	10	1002	40	188.2	8.2	438	23	48.7	2.5	267	14	33.1	2.2	265	17	30.8	2.1	112.88	200.704	38021.4	665.958
GV14JAW183_10			353.5	6.1	87.5	1.6	5800	100	4.09	0.31	6840	100	15950	230	1956	28	8660	120	1681	27	45.9	1.2	1594	26	215.3	3.2	1187	19	221.8	3.5	520.5	8.2	59.7	1.2	276.3	4.8	37.88	0.87	294.5	5.1	29.44	0.65	171.74	205.259	37354.9	660.486
GV14JAW183_11	1.17	0.28	284.9	7.2	84.1	2.1	3480	130	4.6	0.57	4800	180	10700	380	1290	52	5670	220	1107	39	31.8	1.3	1029	39	132.2	5.4	711	28	132.8	3.6	300	13	34.6	1.3	183.7	7.4	21.46	0.69	129.4	8.2	16.29	0.9	113.93	200.76	37665.2	663.507
AB14JAW004_1			2095	44	51.6	1.9	4580	100	0.067	0.049	618	20	2104	57	310	6.9	1443	34	564	13	2.2	0.16	728	15	145.8	3.4	911	24	172.7	3.7	421	10	49.8	1.3	262.7	6.8	30.59	0.84	6.52	0.38	13.28	0.72	281.53	213.801	36414.5	652.2
AB14JAW004_2			3460	100	73.9	2.6	5350	180	0.124	0.073	654	33	2190	100	324	13	1512	57	611	18	3.18	0.37	802	22	165.6	4.4	1042	24	201.6	5.5	489	12	61.3	2.2	345	10	41.8	1.3	11.38	0.51	19.84	0.91	387.22	221.498	36846	655.537
AB14JAW004_3			940	29	44.6	1.5	5930	130	0.06	0.055	528	14	1960	44	293.1	4.6	1397	30	585	12	2.42	0.24	803	17	169.2	4.3	1098	21	213.7	4.7	548	13	68.4	1.8	389.5	9.3	46.2	1.4	8.95	0.38	17.39	0.47	346.52	218.604	36567.3	655.238
AB14JAW004_4			3384	71	51.4	1.2	6070	110	0.075	0.045	729	17	2430	46	360.2	7.3	1655	36	668	14	3.39	0.23	878	16	180.6	3.6	1147	22	221.8	4.1	550	11	68.8	1.6	376.3	6.8	44.5	1.1	25.03	0.9	29.74	0.89	467.69	227.286	36762.7	654.964
AB14JAW004_5			3104	58	59.1	1.9	6230	130	0.105	0.079	761	29	2462	74	359	11	1657	46	658	17	3.01	0.29	874	18	179.3	3.3	1140	24	225.9	5.2	566	13	70.9	1.7	394.4	9.2	47.45	0.99	22.7	0.68	31.87	0.98	282.81	213.871	37010.4	657.394
AB14JAW004_6			3011	57	59.1	1.6	5047	88	0.083	0.044	696	36	2319	98	343	12	1585	52	628	15	3.64	0.24	813	16	163.7	3.2	1023	20	192.2	4	459.2	9.2	54.5	1.1	288.6	6.5	33	0.82	13.63	0.44	23.67	0.59	308.44	215.674	36659.4	654.227
AB14JAW004_7			3147	75	45	1.9	4520	100	0.064	0.059	513	14	1827	44	281	6.9	1300	33	552	16	2.4	0.26	711	16	146.3	3.9	915	24	166.7	4.5	411	12	51.3	1.5	281.6	7.2	32.3	1.1	26.08	0.91	22.02	0.74	122.18	201.512	36273.8	651.971
AB14JAW004_8			2452	75	50.7	1.2	5313	70	0.069	0.042	664	22	2300	69	345.4	8.3	1570	33	631	12	2.86	0.21	816	14	165.6	2.7	1035	16	194.9	3.2	475.6	7.7	58.9	1.1	323.7	6	37.86	0.66	11.49	0.31	23.1	0.44	121.85	201.496	36915.3	656.866
AB14JAW004_9			2172	41	58.2	1.7	2997	57	0.29	0.096	827	46	2800	130	417	15	1913	56	712	18	3.39	0.3	742	19	121.7	2.9	638	10	108.5	2.1	239	5.4	27.8	0.74	146.7	4.8	16.97	0.47	28.7	0.91	35.3	1.1	304.77	215.507	35955.9	650.336
AB14JAW004_10			4191	79	63.2	1.8	4115	85	0.201	0.08	711	24	2012	54	290.3	7.1	1382	31	528	11	4.2	0.29	681	13	132.4	2.6	835	20	156.1	3.5	380.9	8.5	48	1.3	270.5	7.1	31.16	0.85	8.21	0.29	10.7	0.29	577.26	234.783	35885	648.482
AB14JAW004_11			3476	83	53	1.9	5400	230	0.34	0.13	675	81	2220	230	326	28	1490	110	602	31	3.28	0.39	794	29	162	5.5	1030	35	198.7	8.5	493	25	61.6	3.1	341	18	41.3	2.6	24	1.1	24.8	1.3	170.89	205.266	35369.1	645.166
AB14JAW004_12			3415	92	52.2	2.1	4300	140			441	25	1673	74	262	11	1276	51	527	19	3.52	0.56	686	31	138.6	5.9	866	37	160.5	6.8	383	19	45.9	2.6	247	15	28.8	1.5	9.91	0.59	12.71	0.82	553.55	233.153	36741.5	655.029
AB14JAW004_13			2184	39	43.88	0.93	5210	100	0.061	0.042	561	15	1996	47	304.6	6.2	1434	32	597	13	2.72	0.24	788	16	161.2	3.2	1015	19	193.3	4	474.8	9.3	58.8	1.4	320.5	7.3	38.2	1	15.21	0.42	23.37	0.63	346.21	218.6	35387	646.145
AB14JAW004_14			3161	49	46.8	1.4	4417	68			528	15	1927	50	298.5	6.2	1422	27	587	12	2.18	0.17	753	14	148.5	2.2	911	14	167.5	2.4	395.7	6.6	47.68	0.84	255.2	5.2	29.4	0.69	3.02	0.19	9.87	0.34	458.31	226.605	36918.9	656.525
AB14JAW004_15			3331	46	51.1	1.1	6653	94	0.264	0.088	800	32	2604	82	387	10	1813	42	705	14	3.44	0.25	977	16	191	3	1226	17	245.1	3.3	607.4	9.9	73.3	1.3	394	6.8	47.02	0.92	25.93	0.58	35.43	0.58	490.5	228.912	36954	656.143
AB14JAW004_16			2572	43	59.9	1.4	5130	120	0.055	0.051	606	31	2151	91	329	12	1536	46	611	15	2.85	0.23	798	17	159.3	3.5	991	18	194.4	4.7	477	11	56.9	1.4	305.8	9	37.3	1	4.77	0.23	20.95	0.61	105.13	200.154	37838.4	663.53
AB14JAW004_17			3272	56	58.6	1.7	6440	140	0.59	0.18	841	56	2580	150	385	19	1908	84	724	31	4.38	0.34	1035	31	189.7	4.1	1194	25	236.3	5.4	573	13	65.5	1.3	329.9	8	39.6	1.2	20	0.56	23.66	0.49	1138.18	270.368	36132.3	650.563
AB14JAW004_18			3202	55	45.6	1.1	5260	110	0.046	0.046	563	15	2031	48	309.6	7.4	1466	26	611	13	2.96	0.21	808	15	166.2	3.5	1033	23	199.6	4.1	482.5	9.9	58.7	1.4	324.4	7.5	37.62	0.96	22.09	0.41	29.3	0.6	329.82	217.34	36901.7	656.461
AB14JAW004_19			3500	55	57.4	1.4	6045	92	0.052	0.04	526	19	1907	58	295.9	7.1	1404	27	602	14	2.65	0.23	819	13	174	3.1	1134	22	222.9	3.7	566.3	9.2	71.9	1.5	403.7	5.9	48.13	0.98	14.91	0.48	25.88	0.55	506.26	229.951	37492.9	660.434
AB14JAW004_20			2254	39	50.1	1.2	5750	130	0.184	0.073	638	23	2233	60	333.4	8.2	1545	32	630	10	2.63	0.22	826	16	170.5	2.8	1089	19	211.9	3.8	521	11	66	1.7	372.4	8.8	44.4	1.4	22.89	0.76	28.67	0.82	193.94	207.091	36937.9	656.52
AB14JAW004_21			3701	61	64.5	4.5	6170	390	0.41	0.12	781	51	2490	140	367	17	1708	71	658	24	3.26	0.23	896	33	178.2	8	1137	60	228	13	565	38	68.5	5.2	373	31	43.9	4.1	25.3	1.2	28.8	1.4	729.21	244.962	35953.6	649.362
AB14JAW004_22			2393	38	129.3	2.4	2367	35	8.02	0.66	1544	37	3892	80	542	10	2689	40	672	14	9.54	0.42	687	11	89.1	1.5	472.1	7.3	89.8	1.5	202.8	3.6	22.85	0.47	154.9	2.9	15.78	0.38	44.65	0.72	11.12	0.25	201.62	207.644	36297.4	652.045
AB14JAW004_23			3162	55	65.2	1.7	7570	150	1.25	0.22	981	54	3080	150	460	18	2267	79	850	29	3.85	0.25	1138	25	213.3	4.5	1352	24	268.9	4.8	677	14	82.6	1.9	449.5	9.2	53.2	1.3	39.62	0.92	49.2	1	754.83	246.691	36580.9	653.875
AB14JAW004_24			3893	78	53.7	1.2	5956	82	0.291	0.089	620	29	2090	81	311	10	1457	42	607	15	3.17	0.21	824	15	171.2	2.7	1112	18	218.9	3.4	550.6	7.9	69.2	1.1	383	5.8	46.4	0.78	37.98	0.83	33.41	0.72	330.36	217.397	35350.6	645.45
AB14JAW004_25			3761	68	51.3	1.4	4754	79			496	8.8	1814	29	282.6	5.3	1347	23	563	11	3.34	0.23	736	15	149.9	3	946	17	176.6	2.9	433.4	7.5	53.8	1	293.6	5.7	34.51	0.75	2.441	0.091	8.37	0.23	618.69	237.646	36879.9	656.039
AB14JAW004_26			2710	47	60.9	1.2	6210	120	0.035	0.034	438	43	1630	130	256	16	1250	64	558	20	4.21	0.33	805	22	170	3.7	1128	24	226.8	3.9	574	10	70.8	1.6	380.8	7.1	45.04	0.91	1.56	0.18	15	1.5	299.53	215.056	35729.1	646.518
AB14JAW004_27			2928	47	50	1.2	6440	190	0.104	0.059	738	21	2469	61	364.8	8.7	1652	33	665	14	2.91	0.28	882	16	183.8	3.5	1190	33	231.3	5.8	593	19	74.1	2.6	416	17	49.3	2.2	28.28	0.62	34.7	0.74	51.45	195.762	36678.6	654.44
AB14JAW004_28	0.76	0.41	3778	66	56.4	1.2	6830	580	1.05	0.28	743	77	2400	200	349	23	1625	90	660	28	4.45	0.32	928	42	191	10	1245	83	248	20	632	57	79.5	8.5	444	53	52.6	6.7	26.89	0.72	33.5	1.3	1480.13	289.889	35981.2	648.985
AB14JAW004_29			2426	54	52.1	1.5	4330	100	0.19	0.12	671	20	2334	57	347.9	8.4	1603	42	628	18	2.76	0.23	749	16	146.5	4	891	22	161.1	4.3	393	11	48.6	1.4	275.5	6.2	31.55	0.96	21	0.68	22.93	0.85	314.16	216.19	35434.4	645.847
AB14JAW004_30			3279	57	44.7	1.1	5036	81	0.039	0.034	576	16	2103	52	327.5	8.7	1536	31	648	12	2.68	0.22	828	17	165.8	3.2	1031	18	188.2	3.3	451.7	7.9	56.8	1.4	316.2	5.2	36.63	0.78	24.62	0.57	30.46	0.67	434.36	224.963	35420	645.672
AB14JAW004_31			2690	35	48.4	1.2	5380	180	0.29	0.11	561	19	2018	51	315.7	7.3	1508	34	621	12	2.82	0.19	842	17	168.9	3.6	1058	27	204.4	6	497	17	59.3	2.4	322	14	37.2	1.8	22.87	0.56	30.1	0.64	153.85	203.999	36337.9	652.132
AB14JAW004_32			3761	58	55	1.2	5013	63	0.08	0.048	723	18	2248	50	320.9	6.1	1470	25	591	9.4	3.89	0.25	776	13	156.4	2.9	997	14	190.7	2.7	465.3	6.4	58.57	0.96	331.6	4.9	39.01	0.78	24.56	0.58	31.08	0.62	712.85	243.88	36899.5	655.779
AB14JAW004_33			3901	87	53.4	1.3	6150	100	0.163	0.068	654	15	2226	48	333.4	6.8	1540	30	630	12	2.53	0.18	846	17	175.4	2.8	1134	18	224.2	3.9	562.5	9.1	70.8	1.3	400.3	7.4	48.1	0.83	19.95	0.43	25.21	0.52	346.62	218.563	37248	658.545
AB14JAW004_34			3088	50	50	1.2	5340	140	0.212	0.08	551	26	1990	77	307.1	9.4	1432	38	596	13	2.66	0.22	779	17	160.6	3.3	1014	24	194.4	5.3	477	12	62	1.8	359	12	42.3	1.4	9.95	0.28	16.68	0.48	450.09	226.038	36050.5	650.068
AB14JAW004_35			2679	65	52.2	1.6	4840	120	0.187	0.099	546	13	1921	47	292.8	8.9	1363	36	556	12	2.93	0.37	739	15	152.6	3.3	965	23	182.1	4.6	448	11	55.3	1.8	315.3	7.2	37	1.3	20.21	0.77	27.15	0.95	234.52	210.171	36972.2	657.216
AB14JAW004_36			3206	50	43.5	1.1	5753	91	0.091	0.044	701	10	2441	37	359.3	5.6	1639	27	652	11	2.52	0.19	838	14	173.7	2.6	1100	17	210.7	3.4	522.8	8.3	66.4	1.3	377.9	7.2	45.54	0.81	23.02	0.47	27.91	0.6	321.45	216.686	37122.2	657.869
AB14JAW004_37			3249	52	71.2	1.5	5256	94	0.155	0.074	746	25	2066	59	294.2	8.6	1347	30	509	11	5.03	0.33	693	15	145.2	2.8	960	17	196.2	3.5	508.6	9.5	66.5	1.3	391.2	7.3	49.74	0.81	20.36	0.51	23.69	0.66	305.1	215.485	35947.8	649.796
AB14JAW004_38			2535	56	49.9	1.4	5721	87	0.064	0.039	617	40	2110	100	319	12	1498	52	615	16	2.9	0.2	821	15	169.4	2.5	1077	14	209.4	2.9	521	7.5	65.5	1.1	366	6.2	43.31	0.86	9.88	0.31	20.08	0.52	409.85	223.064	37643.7	661.544
AB14JAW004_39			3115	63	40.8	1.1	4726	70	0.096	0.05	562	10	2039	32	316.1	4.9	1487	26	630	10	2.36	0.16	802	13	161.3	2.7	982	16	179.4	2.7	424	7.1	52.9	1	285.8	5.3	33.41	0.66	23.88	0.49	26.89	0.52	289.43	214.427	35935.5	649.671
AB14JAW004_40			3191	56	51	1.2	6240	120	0.26	0.1	756	30	2465	86	360	12	1644	45	647	16	3.04	0.24	866	20	178.8	3.9	1160	22	225.8	4.2	574	10	73.4	1.3	417.9	8.6	50.2	1	24.25	0.53	38.2	0.84	186.24	206.514	36356.1	652.405
GV14SKR033_1			576	10	142.7	2.6	971	13	1.44	0.2	783	10	2274	31	332.7	4.8	1599	23	500.8	8.7	8.46	0.4	509	8.5	66.9	1.3	271.6	4.3	28.96	0.52	38.81	0.86	3.21	0.15	13.66	0.58	1.24	0.1	71.5	1.2	189.1	3.1	1589.69	295.955	29947.4	604.147
GV14SKR033_2	0.47	0.13	484.2	8.4	132.1	2.8	449.8	6.5	0.276	0.095	124.1	2.1	744	11	151.2	2.3	853	13	455.8	8.1	7.28	0.29	505	9.2	60.35	0.95	178	3.4	15.38	0.34	20.05	0.66	1.76	0.11	8.79	0.64	0.816	0.086	0.774	0.051	45.76	0.82	5419.96	458.077	30906.3	612.198
GV14SKR033_3	0.133	0.091	531.9	8.7	184.4	3.1	2674	35	0.9	0.18	884	12	2659	37	388.9	6	1781	26	410.2	6.5	9.06	0.45	532.6	9.8	111.6	1.7	694	12	110.2	1.6	169.4	2.3	11.16	0.28	31.4	1.2	2.04	0.15	4.75	0.15	46.22	0.78	1655.48	299.504	31907.4	619.838
GV14SKR033_4			665	12	186.4	3.5	1785	23	0.51	0.12	531.3	7.9	1786	23	289.7	4.7	1471	23	416.2	7.9	8.84	0.42	500	10	88.1	1.7	494.2	8.5	67.7	1.3	86.3	2.3	4.68	0.16	11.97	0.71	0.848	0.066	11.69	0.31	107.1	2.1	1678.34	300.644	31840.2	618.853
GV14SKR033_5	0.094	0.063	701	13	165.8	3.3	1999	28	0.49	0.14	513.1	7.8	1571	23	239.2	3.7	1206	19	376.4	7.7	8.32	0.3	466.4	9.6	85.5	1.6	495.1	7.7	73.4	1.1	105.5	1.7	6.27	0.2	16.23	0.66	1.077	0.075	27.95	0.53	109.9	1.8	2534.68	343.192	31104.3	612.464
GV14SKR033_6	0.113	0.068	266.5	5.8	184.6	3.7	1511	24	0.09	0.053	171.2	3.6	536	11	84.2	1.8	446	8.8	212	5	7.63	0.36	417	8.1	79.8	1.6	413.9	7.2	62.9	1.1	124.8	2.1	13.8	0.35	72.8	1.7	8.32	0.32	0.245	0.028	5.13	0.15	687.53	242.126	39242.2	674.766
GV14SKR033_7	0.15	0.081	157.1	4.4	203.2	6.6	1096	16	0.29	0.13	177	13	547	25	95.2	3.8	618	25	351.3	9.1	8.32	0.66	493	12	67.1	1.8	301.5	7.2	41.27	0.86	74.2	2.1	7.18	0.26	31.7	1.2	3.26	0.18	0.288	0.033	90.9	2.2	3140.42	370.322	32691.1	626.911
GV14SKR033_8			288.2	7.2	139.4	3.2	983	22	0.052	0.044	228	5.7	559	12	75.6	1.8	353.7	8.3	120.6	3.7	7.24	0.39	188.9	4.3	36.24	0.83	217.2	4.7	36.9	0.93	76.6	2.1	7.84	0.26	38.9	1.3	3.86	0.21	0.02	0.012	7.94	0.23	3258.52	375.283	34772.8	642.654
GV14SKR033_9			227	5.2	185.5	3.5	1289	18	0.2	0.083	357.2	5.7	939	14	133.4	2	672	12	283.6	5.4	9.02	0.33	582	10	102.6	1.8	446.7	7.9	51.04	0.94	63.1	1.7	3.81	0.17	10.98	0.6	0.77	0.065	0.749	0.051	10	0.21	2740.6	352.575	33930.9	636.277
GV14SKR033_10	0.095	0.072	219.8	5.4	155	3.7	1062	22	0.055	0.042	102.3	2.3	344.2	8.1	57.4	1.3	329	10	175.1	5.1	7.11	0.36	287.9	6.4	50.3	1.3	265.1	6.3	41.8	0.84	80.8	2.1	7.79	0.32	36.1	1.3	3.85	0.19	0.468	0.051	9	0.26	1247.68	276.686	38119	666.913
GV14SKR033_11	0.172	0.088	93.6	2.6	174.9	3.8	527	12	0.97	0.22	105.5	2	376.7	6.9	65.1	1.5	410.2	9.3	310	8.1	5.64	0.36	667	13	74.3	1.4	220.1	4.5	21.91	0.83	32.2	1.2	3.02	0.21	13.28	0.71	1.159	0.092	0.112	0.017	5.88	0.18	1039.1	264.32	33054.1	630.132
GV14SKR033_12			699	13	172	4	1024	17	3.66	0.34	735	14	2341	35	357.7	6.2	1745	28	659	11	6.77	0.35	789	14	96	1.7	339.1	6.8	36.15	0.82	46.4	1.4	3.16	0.15	10.08	0.62	0.911	0.086	55.6	1.2	74.5	1.5	2613.41	346.842	31568.4	616.761
GV14SKR033_13	0.119	0.075	243.1	5.2	194	3.3	1384	21	0.133	0.061	184.9	3.4	581.4	8.7	94.8	1.8	567	10	325.4	6.9	4.79	0.33	858	15	144.3	2.7	552.1	9.3	58.1	0.99	72	1.5	4.3	0.17	14.19	0.77	1.384	0.086	0.13	0.022	5.15	0.2	4691.42	432.087	33364.2	631.819
GV14SKR033_14			351.8	8.5	175.9	2.8	1566	22	0.066	0.043	170.9	3.3	507.7	8.9	77.2	1.6	385.6	7.8	156.6	4	7.38	0.34	325.6	6.9	71.2	1.4	396.2	7	60.8	1.1	116.4	2.4	11.24	0.34	51	1.7	5.53	0.23	0.026	0.01	11.19	0.27	3211.11	373.268	33741.4	634.833
GV14SKR033_21	0.78	0.16	456.9	9.6	98.6	2.4	1275	21	1.44	0.21	45.7	1.2	347	7.4	97.6	1.9	751	18	422.5	9.5	5.87	0.41	237.6	5.2	33.6	0.69	213	4.5	46.25	0.75	131.9	3.2	20.5	0.44	30	1.1	19.06	0.51	0.0035	0.0036	5.69	0.15	3194.96	372.502	33126	629.237
GV14SKR033_22			187.5	5	133.3	2.4	1036	21	0.047	0.037	144.1	3.8	312.9	8.9	39.3	1.2	176.9	5.5	95.6	1.9	7.43	0.38	232.5	5.5	50.6	1.2	267	6.8	39.9	1	79.8	1.8	8.31	0.29	43.3	1.4	5.07	0.23			0.709	0.069	433.81	224.714	37294.9	660.66
GV14SKR033_23	0.68	0.33	182.7	3.3	126.5	2.2	1121	22	0.101	0.073	92.4	1.3	331.2	4.7	56.6	1.1	319.1	6	148	3.6	6.08	0.34	244.7	6.3	47.5	1.2	263.1	5.9	43.3	1	92.8	2.7	9.85	0.35	49.7	1.7	5.56	0.22	0.0085	0.0051	1.531	0.084	512.73	230.294	39167.7	674.132
GV14SKR033_25			159.9	3.6	159.2	3.6	915	15	0.054	0.035	98.9	1.9	337.3	5.6	53.9	1.2	287.1	5.8	158.6	4.1	6.14	0.32	289.6	6.9	49.8	1.1	250.8	4.4	42.4	0.69	96.1	1.9	10.98	0.25	59	1.4	6.96	0.24	0.139	0.021	2.761	0.094	536.9	232.066	34453.9	640.764
GV14SKR033_26			181.3	5	217.4	4.4	1206	25	0.71	0.22	121.2	6	529	24	106.5	3.8	661	19	364.6	9.7	5.77	0.31	568	16	85.2	1.7	376.8	8.3	46.6	1.3	62	2.1	3.84	0.22	11.8	0.85	0.85	0.1	0.094	0.039	12.56	0.6	5022.71	443.895	32370.8	624.009
GV14SKR033_27			204.5	4.8	129.5	2.2	1038	16	0.17	0.065	81.4	2	320.7	4.9	61.8	1.1	427.6	7.6	395.2	6.9	5.86	0.26	1002	15	133.4	2.3	438.7	8.1	42.97	0.75	52	1.2	3.27	0.15	11.57	0.51	1.124	0.08	0.087	0.018	5.66	0.18	3553.9	387.652	32127.8	622.755
GV14SKR033_28	0.22	0.16	157.4	5.7	125.7	4	854	14	0.07	0.056	70.3	1.8	256.5	5.9	44.7	1.3	260.7	7.9	167.4	6.9	3.72	0.35	372	11	59.3	1.5	259.9	7.1	34.97	0.99	59.1	1.9	4.87	0.24	19	1.1	2.3	0.17	0.08	0.018	5.7	0.21	1077.75	266.661	34635.5	642.15
GV14SKR033_29	0.073	0.055	206.2	4.8	161.3	2.5	1775	26	0.103	0.052	139.2	2.4	513.4	8.1	90.4	1.4	521.4	9.7	242.5	5.9	5.66	0.3	431	6.4	87.9	1.5	481.8	8.4	72.3	1.5	122.3	2.5	9.71	0.31	37.8	1.2	3.88	0.18	1.298	0.085	20.21	0.32	506.24	229.86	38846.8	671.498
GV14SKR033_30			178.5	3.8	166.9	3.7	1419	29	0.038	0.043	128.9	2.3	522	11	95.7	2.1	542	12	195.8	6.5	6.11	0.45	258.8	7.3	54.1	1.4	349.3	8.9	57.1	1.3	101.8	3.1	8.65	0.31	36.5	1.7	3.98	0.21	0.295	0.042	17.56	0.42	1289.48	279.092	35089.7	644.651
GV14SKR033_31			230.2	4.6	186.8	3.5	1578	20	0.096	0.052	192.1	2.9	599.8	8.2	94.2	1.5	503.9	7.6	197.6	4.4	6.16	0.34	411.9	6.6	83	1.3	432.5	7	65.1	1.2	120.6	2.1	10.59	0.36	44	1.4	4.85	0.19	2.68	0.11	8.82	0.2	823.9	250.995	34508.8	640.411
GV14SKR033_32			438.2	8.4	181.4	3.7	1384	18	0.142	0.072	168.3	2.8	714	10	134.9	2.5	769	12	276.5	4.9	6.47	0.32	380.3	6.5	68.1	1.1	360	6.3	45.88	0.9	58.7	1.5	3.89	0.18	13.9	0.79	1.247	0.081	10.48	0.32	59.3	1.1	1397.4	285.293	30587.7	610.482
GV14SKR033_33			250.4	5.4	180.7	3.2	1770	22	0.074	0.051	173.8	2.7	584.9	7.7	97.7	1.4	544.5	8.5	238.6	4.5	6.62	0.29	383	6.8	68.7	1.2	396.2	6.1	67.6	1.1	135.5	2.1	12.95	0.33	57.8	1.5	5.72	0.22	1.474	0.069	10.53	0.24	687.87	242.276	36385	654.651
GV14SKR033_34	0.15	0.11	265.9	8.8	226.4	8.8	1413	31	0.56	0.15	127	4.5	589	19	119.7	5.3	720	29	322	13	6.19	0.51	428	16	70.4	3	366	14	53.5	1.5	84.3	4.1	6.01	0.45	20.9	1.7	1.83	0.17	0.045	0.018	33.4	1.6	3967.17	404.564	32646.5	626.428
GV14SKR033_35			195.5	2.9	132.3	2.3	1017	15	0.014	0.019	90.9	1.6	242.9	2.7	35.01	0.64	175.2	4.3	88.5	2.5	6.23	0.27	214.7	4.7	41.79	0.79	229.4	4.5	38	0.82	82.1	2	9.02	0.32	47.63	0.96	5.97	0.24			1.211	0.077	432.07	224.666	34496.3	640.941
GV14SKR033_36			913	17	166	3.1	1107	18	3.11	0.33	805	12	2494	37	384.7	6.3	1901	31	707	11	7.69	0.35	813	14	99.2	1.8	352.3	6.2	39.74	0.85	59.7	1.2	4.96	0.17	20.31	0.84	1.72	0.12	54.8	1	141.5	2.7	2955.55	362.217	24601.2	558.698
GV14SKR033_37	0.19	0.11	571	11	194.9	3.6	1384	22	0.65	0.12	670	12	2255	37	362.8	6.6	1779	35	445.8	8.4	8.17	0.38	492	10	83.2	1.4	422.9	7.6	52.8	1	60.8	1.6	2.93	0.14	6.19	0.34	0.376	0.05	8.34	0.37	25.22	0.76	2125.58	323.481	31819	619.021
GV14SKR033_38			326.5	6.2	207.8	4.4	2688	43	0.171	0.066	153.9	2.9	456.9	8	73.5	1.2	395.8	7.4	216.6	4.9	5.81	0.26	506	10	105.8	1.9	615	10	112.7	2.2	247.6	4.6	24.9	0.64	105.1	2.3	11.46	0.36			6.64	0.21	3492.64	385.184	32420.7	624.075
GV14SKR033_39			165.7	3.2	139.8	2.6	812	16	0.058	0.038	94.8	1.5	263.2	5.4	38.89	0.89	205.5	4.8	123.8	2.7	7.35	0.38	257.1	5.2	44.9	1.1	217.1	5.3	31.66	0.77	64.4	1.9	6.89	0.29	35.9	1.2	4.3	0.18	0.003	0.0032	1.876	0.09	305.01	215.434	36169.1	653.074
GV14SKR033_40			854	13	194.5	3.5	1472	22	1.12	0.2	492.8	6.7	1487	22	228.3	4	1147	20	360.1	7.7	7.9	0.38	422.9	8.4	69.6	1.3	360	6.3	49.64	0.9	72.3	1.9	5.3	0.2	17.52	0.67	1.21	0.1	38.21	0.88	93.3	1.7	1718.32	302.692	32330.3	622.704
GV14SKR033_41	0.135	0.073	161.7	3.1	178.7	2.7	936	10	0.123	0.062	160.4	1.8	647.5	8	120.6	1.6	794.9	9.7	682.6	9.1	6.34	0.34	1200	17	122.9	1.8	371.6	5.5	38.43	0.79	52.5	1.1	3.86	0.16	13.87	0.6	1.63	0.1	0.111	0.017	6.54	0.17	1454.41	288.387	33642.5	634.362
GV14SKR033_42			683	12	217.1	3.9	812	11	2.35	0.22	1085	15	3458	43	538	6.8	2686	34	762	11	8.89	0.3	661	11	81.9	1.3	291.6	5.3	26.61	0.59	29.5	0.87	1.811	0.098	6.01	0.41	0.562	0.049	10.06	0.19	40.3	0.72	2668.17	349.319	30988.6	612.746
GV14SKR033_45			250.4	5.7	124	2.9	842	17			97.5	2.3	287.1	6.4	44.8	1.3	239.8	5.7	91.4	3.7	6.71	0.34	145.4	5.4	29.28	0.7	184.7	4.3	34.11	0.78	82	2.2	10.15	0.37	56.8	2.2	7.04	0.36	0.189	0.036	4.41	0.24	672.94	241.266	34980.9	644.308
GV14SKR033_46	0.28	0.11	592	14	166.3	3.5	663	14	0.63	0.19	408.9	7.5	1748	37	326	7	1846	36	637	15	6.56	0.38	647	14	71.4	1.6	237.5	5.5	23.52	0.67	31.5	1.1	2.18	0.14	7.69	0.68	0.634	0.074	0.0157	0.0071	24.32	0.67	2983.79	363.542	32406.9	623.706
GV14SKR033_47			367.4	6.8	97.3	2.8	716	18	0.103	0.06	113.8	3.6	273	6.9	34.5	1	154.6	6	64.8	2.6	6.3	0.34	108.1	4.5	25.83	0.78	160.5	4	27.6	0.66	58.9	1.6	7.03	0.33	38.9	1.3	4.59	0.21			3.2	0.13	2655.01	348.544	34501.2	640.747
GV15JAW261_1	1.41	0.28	261.4	8.8	325	8.4	330	12	0.173	0.09	493	17	1485	58	199.1	7.7	917	31	154.1	6.7	9.7	0.59	116.7	6.8	13.39	0.64	65.7	3.6	11.94	0.53	29.3	1.9	3.5	0.25	19.6	1.2	3.03	0.22	16.5	1.2	84.5	4.9	1640.37	298.639	29933.7	606.229
GV15JAW261_2	1.7	0.23	266.4	5	325.6	5.9	288.4	5.8	0.215	0.088	457.2	8.2	1334	24	181	3.4	811	15	136	3.7	8.78	0.4	105.3	3.1	11.68	0.41	58.1	1.4	10.42	0.34	24.83	0.72	2.86	0.15	17.06	0.82	2.39	0.12	11.49	0.41	57.3	1.2	1336.11	281.81	31116.4	615.237
GV15JAW261_3	0.45	0.13	273.1	6.1	342.4	7.2	382.5	6.2	0.18	0.09	348.8	6.4	1037	16	148.8	2.8	707	16	141.5	4.3	10.49	0.46	126.1	4.8	14.94	0.48	76.2	1.9	13.86	0.5	33.37	0.94	3.94	0.2	22.93	0.86	3.54	0.24	8.24	0.41	47.8	1.1	933.37	257.862	31442.8	618.286
GV15JAW261_4	1.17	0.17	257.6	5.7	332.7	5.9	313.5	6.3	0.116	0.058	321.2	5.4	989	17	141.8	2.5	672	13	132.8	3.5	8.64	0.39	110.6	3.2	12.43	0.33	61.4	2	11.41	0.29	27.06	0.85	3.02	0.13	17.57	0.84	2.67	0.15	3.68	0.14	34.8	0.84	1631.39	298.036	31551.2	618.759
GV15JAW261_5	2.01	0.22	236.7	3.9	323.1	5.6	299	9.8	0.149	0.079	482	13	1406	37	192.3	5.7	846	24	140.9	4.7	9.1	0.42	108	3.8	12.04	0.42	58.8	2.1	10.79	0.43	26.88	0.81	3.21	0.17	18.3	1	2.6	0.15	11.07	0.54	45.7	1.9	1581.01	295.348	33362.7	632.807
GV15JAW261_6	0.92	0.27	246.6	8.3	333.4	9.3	219.2	8.9	0.133	0.083	238.5	8.6	724	30	101.7	4.3	474	20	93.2	5.2	6.74	0.57	80.1	4.9	9.07	0.42	44.5	2.2	7.86	0.7	18.2	1.1	2.32	0.17	12.93	0.88	1.98	0.22	3.93	0.31	22.5	1.5	1398.7	285.282	31003.6	614.705
GV15JAW261_7	1.84	0.36	258.5	8.2	333.1	7.8	321.9	6.7	0.31	0.12	395.2	8.5	1153	22	159.2	3.1	740	16	138.1	3.8	9.43	0.48	111.5	3.9	12.58	0.47	63.4	2	11.67	0.54	28.2	1.2	3.43	0.16	18.35	0.79	3	0.17	11.66	0.43	53.1	1.3	1165.38	271.89	32086.9	623.146
GV15JAW261_8	1.65	0.28	240.2	7.1	325.8	7.6	337.7	6.8	0.164	0.073	451	8.3	1333	27	185	3.8	862	19	149.8	5	9.13	0.42	117.3	2.9	13.55	0.53	67.3	2.7	12.42	0.39	29.07	0.99	3.54	0.2	19.9	1	3.01	0.17	9.41	0.25	61.6	1.5	1789.63	306.371	31235.4	616.114
GV15JAW261_9	1.62	0.22	276.7	5.7	339.3	6.2	261.1	4.1	0.152	0.059	422.7	7.4	1232	20	163.3	2.9	709	13	117.3	3.2	8.94	0.39	87.6	2.2	10.02	0.33	50.8	1.4	9.29	0.28	22.13	0.63	2.7	0.15	17.28	0.82	2.51	0.14	7.6	0.23	55.71	0.82	1615.11	297.244	30100.7	607.559
GV15JAW261_10	2.17	0.49	235.1	9.3	329	10	354	11	0.46	0.17	400	12	1247	39	177.8	6.4	846	34	160.1	4.9	9.09	0.58	126.3	8.1	13.9	0.28	67.8	3.2	13.17	0.71	30.5	1.4	3.74	0.39	20.8	2	3.16	0.31	19.8	1.5	75.6	3.8	1542.93	293.298	29770.9	605.01
GV15JAW261_11	0.19	0.081	245.1	4.1	322.3	4.1	244.7	3.8	0.059	0.039	351.6	5.5	1036	15	141.5	2.3	643.7	9.7	108.7	2.5	7.43	0.3	87.3	2.4	9.68	0.27	47	1.3	8.66	0.27	21.13	0.57	2.57	0.12	14.87	0.65	1.98	0.11	3.07	0.12	24.92	0.48	1445.86	287.898	32418.3	625.619
GV15JAW261_12	1.25	0.29	233	7.3	322.3	6.9	371.2	9.2	0.17	0.15	464	20	1417	33	200.3	7.3	937	31	172.1	6.7	9.96	0.71	135.6	6.7	15	0.67	77	3.6	13.84	0.7	31.6	1.5	3.65	0.54	20.9	2	2.94	0.21	9.35	0.59	61.6	3	1204.42	274.21	29929.4	606.855
GV15JAW261_13	1.33	0.41	232	10	321	11	432	24	0.223	0.085	493	28	1564	78	229	10	1109	43	202	8.7	11.12	0.96	163	10	17.76	0.95	89	5.2	15.57	0.73	37.6	2.5	4.65	0.32	23.7	2.6	3.87	0.38	9	1.2	70.2	6.3	1309.81	280.276	32048.1	623.032
GV15JAW261_14	1.4	0.23	259.3	5.2	338.7	5	301.4	4.3	0.08	0.045	387.4	5.8	1165	17	164.3	2.4	759	12	136	3.3	8.57	0.51	106.1	3.2	12.04	0.42	60.1	1.9	10.77	0.34	24.91	0.87	3	0.13	17.72	0.68	2.57	0.17	10.87	0.36	59.2	1.3	1373.79	283.968	31105.5	615.772
GV15JAW261_15	1.11	0.28	245.5	7.2	325.5	8.3	231.2	4.8	0.057	0.061	405.2	6.9	1178	24	160.5	3.9	721	16	117	5	7.33	0.47	87	3.8	9.51	0.31	45.5	2.1	8.31	0.32	20.2	0.99	2.36	0.26	12.86	0.91	1.86	0.24	9.94	0.43	46.44	0.96	1567.18	294.579	30780.6	612.954
GV15JAW261_16	0.257	0.092	262.9	5.8	329.7	7	285	5.8	0.032	0.036	284.1	5	879	16	127.4	2.3	629	10	121.8	3	7.26	0.44	102.1	3.2	11.67	0.32	58.6	1.5	10.47	0.33	24.28	0.98	2.82	0.15	16.2	0.99	2.38	0.18	1.78	0.12	21.73	0.6	1614.21	297.113	31023.9	614.968
GV15JAW261_17	2.95	0.4	263.3	4.8	327	7.4	482.6	8.6	0.43	0.13	420.9	7.5	1329	26	198.2	3.7	992	21	202.6	5.7	10.85	0.36	173.8	4.5	19.82	0.51	98.7	2.2	18.08	0.54	42	1.1	4.76	0.22	28	1.4	4.01	0.23	18.68	0.6	78.4	1.8	1262.9	277.631	31073.8	615.333
GV15JAW261_18	7.8	2.4	253	5.7	315.5	4.7	255.3	4.4	0.03	0.029	466.2	6.9	1370	20	183.7	2.4	812	14	126.3	3.5	7.63	0.32	95.2	2.2	10.38	0.23	50	1.4	9.25	0.24	21.04	0.7	2.58	0.12	15.12	0.69	2.25	0.13	5.6	0.15	43.63	0.71	1518.19	291.942	30750.3	613.029
GV15JAW261_19	1.41	0.22	262.4	6.1	320.4	6.6	218.4	4.9	0.124	0.072	397.5	6.8	1162	23	156.8	3.5	694	16	108.3	4	7.13	0.43	76.7	2.9	8.89	0.36	42.3	1.3	7.86	0.29	18.02	0.77	2.29	0.18	12.8	0.73	2	0.16	7.05	0.19	37.58	0.67	1884.77	311.339	30939.2	614.016
GV15JAW261_20	1.09	0.27	234.7	7	320.3	5.3	422.8	8.9	0.131	0.07	386.3	7.6	1213	25	178.6	3.7	883	16	178	4.2	10.57	0.46	148.7	4.7	17.23	0.49	86.6	2.6	15.8	0.52	36.4	1.2	4.32	0.21	24.2	1	3.57	0.2	4.88	0.17	58.6	1.3	1422.19	286.631	33614.6	634.79
GV15JAW261_21	1.5	0.52	270.2	8.5	337	7.6	396.3	6.8	0.15	0.11	276.4	5.8	893	18	139.5	4.2	703	14	154.6	4.9	9.88	0.44	135.2	6.7	16.05	0.71	79.5	3	14.37	0.56	33.8	1.3	3.99	0.25	22.7	1.2	3.25	0.25	7.7	0.48	56.4	1.6	1294.69	279.384	31674.4	619.598
GV15JAW261_22	1.65	0.28	240.8	6.5	331.6	8.6	433	12	0.148	0.082	422	12	1323	36	195.6	6	960	30	193.1	8.4	10.12	0.64	155.2	4.4	17.88	0.58	86.3	2.9	16.15	0.6	37.5	1.8	4.15	0.21	24.46	0.94	3.54	0.2	9	0.4	57.4	1.9	1294.98	279.428	30842.9	613.389
GV15JAW261_23	0.41	0.2	252.5	6.9	322.3	7.1	276.5	8	0.134	0.081	399	12	1166	30	159.1	4.4	720	22	120.2	5.7	7.8	0.45	94.7	3	11.07	0.55	54.3	2	9.92	0.46	24.7	1.3	2.87	0.19	17.8	1.2	2.53	0.17	3.17	0.21	32.8	1.1	1471.71	289.479	28932.9	598.57
GV15JAW261_24	1.61	0.35	245.1	7.3	337.8	6.5	526.2	9.6	0.43	0.16	496	9.8	1552	30	220.8	4.1	1060	24	199.4	4.5	13.57	0.67	172.6	4.9	20.2	0.57	102	2.4	19.21	0.65	45	1.5	5.62	0.23	32.1	1.3	4.63	0.26	18.57	0.45	106.5	1.8	1228.71	275.617	30549.7	611.581
GV15JAW261_25	1.88	0.28	255.1	5.7	332.1	5.2	294	10	0.136	0.086	387	11	1164	34	160.4	4.2	758	21	132.2	5.7	8.35	0.35	105.6	3.6	12.31	0.47	56.8	3	10.63	0.44	25.8	1.4	2.83	0.27	17.3	1.2	2.49	0.27	7.77	0.39	45.7	2.2	1493.99	290.637	30377.7	610.094
GV15JAW261_26	0.75	0.15	259.4	4.9	328.3	5.5	299.1	4.7	0.11	0.06	276.9	3.9	874	13	128	2	621.6	9.8	124.7	3.6	7.91	0.33	105	2.9	11.94	0.28	60.3	1.5	10.91	0.28	25.49	0.76	3.01	0.14	16.74	0.75	2.5	0.12	4.76	0.18	30.61	0.64	1281.17	278.698	31298.5	616.887
GV15JAW261_27	2.12	0.44	241.6	6.5	328.6	7.1	309.4	4.8	0.21	0.095	381.1	8.7	1137	24	160.6	3.7	754	23	133.3	4.4	8.47	0.33	105.7	3.8	12.1	0.29	62.2	2.2	11.43	0.51	26.6	1	3.2	0.22	18.9	1	2.83	0.21	8.98	0.33	47.5	1.4	1294.55	279.39	30021.6	606.785
GV15JAW261_28	0.51	0.16	256.4	6	326	9.1	224.6	4.1	0.103	0.072	293	5.5	879	17	121.8	2.4	554	14	96.6	3.6	6.68	0.45	75.6	3.6	8.56	0.38	44.1	1.7	8.2	0.33	18.64	0.75	2.45	0.2	14.04	0.95	2.06	0.18	2.42	0.17	21.28	0.51	1686.23	301.029	30480.9	610.91
GV15JAW261_29	0.46	0.15	260.6	6.1	332	7	283	6.8	0.07	0.045	303.6	8.3	934	22	135	3.5	665	16	124.9	3.8	7.85	0.44	102.6	3.5	11.44	0.39	57.7	1.8	10.6	0.39	23.5	1.1	2.8	0.17	16.07	0.86	2.4	0.15	4.06	0.19	39.9	1.2	1359.19	283.108	30405.4	610.176
GV15JAW261_30	2.62	0.47	246.8	6	329	5.6	348	16	0.32	0.13	418	18	1240	51	177.5	8.5	839	38	157	8.2	8.65	0.5	130.5	6.8	14.14	0.84	71.6	2.5	13.07	0.78	29.9	1.1	3.6	0.33	20.1	1.3	2.83	0.21	12.3	1	56.1	2.6	1166.41	271.979	31120	615.486
GV15JAW261_31	3	1	256	4.9	325.1	5.9	305.9	5.1	0.09	0.057	362.8	6.4	1090	18	155.3	3	746	14	136.6	3.9	8.3	0.39	112.1	2.3	12.45	0.37	61.5	1.3	11.25	0.38	25.84	0.72	3.19	0.17	16.93	0.73	2.6	0.17	5.89	0.2	38.81	0.63	1734.86	303.543	31177	615.852
GV15JAW261_32	0.52	0.12	237.9	5.3	309.1	5.8	346.2	6.7	0.091	0.052	356.5	6.2	1121	21	167	2.7	837	16	160	5.5	8.57	0.48	131	4	14.28	0.4	71.1	1.9	12.35	0.37	29.76	0.84	3.32	0.16	20.3	1.2	2.74	0.19	3.01	0.17	30.39	0.63	1789.7	306.468	32437.2	625.86
GV15JAW261_33	1.07	0.36	239.5	5.7	319.9	8.1	286.8	7.4	0.114	0.07	286.7	6.9	889	19	129	3.5	623	13	123.1	5.9	8.37	0.68	104.7	4.7	11.36	0.4	57.6	2.2	10.72	0.51	24.6	1	2.88	0.18	16.4	1.2	2.51	0.3	4.69	0.21	29.37	0.96	1277.39	278.379	31929.5	621.852
GV15JAW261_34	2.8	0.39	266.5	6	327.6	7.1	434.5	7.9	0.4	0.12	447.3	7.6	1385	24	195.9	4	924	18	171.5	4.3	11.62	0.53	138.9	3.7	17	0.56	85.3	2.3	15.66	0.52	37.9	1.2	4.67	0.18	26.7	1	4	0.22	22.13	0.62	92.8	1.8	1655.05	299.385	30284.2	608.955
GV15JAW261_35	0.85	0.17	248.5	4.5	329.7	4.5	250.4	4.7	0.086	0.043	417.6	6.6	1222	20	165.3	3.1	734	15	119.3	3.5	7.85	0.3	90.1	2.5	9.96	0.29	50.2	1.4	8.86	0.24	21.59	0.61	2.55	0.12	15.04	0.89	2.17	0.13	5.03	0.26	45.3	1.3	1269.95	278.056	31313.4	617.632
GV15JAW261_36	2.25	0.39	247.2	5.7	328	7.4	323.9	8.8	0.37	0.14	474	15	1387	41	186.4	6.1	827	25	139.4	4.6	10.22	0.57	111.1	4.2	12.52	0.54	61.3	2.9	11.91	0.63	28.3	1.2	3.43	0.22	20.4	1.4	3.03	0.2	16.77	0.55	83.7	2.3	1454.33	288.427	31717.3	620.336
GV15JAW261_37	1.26	0.31	251.6	5.3	326.6	7.9	318.2	6.7	0.076	0.062	296.8	5.7	914	19	134.4	3.1	644	14	128.2	3.5	8.27	0.53	107.9	4.6	12.92	0.59	62.4	2.4	11.52	0.45	26.5	1.4	3.05	0.25	17.9	1.1	2.75	0.23	3.56	0.18	32.68	0.71	1361.15	283.28	30520	610.913
GV15JAW261_38	0.69	0.16	242.2	4.7	306.4	5.6	306.7	5.5	0.083	0.055	384.1	7	1203	19	172.5	2.8	813	16	142.8	3.9	7.92	0.27	108.6	2.9	12.27	0.37	60.1	1.6	11.16	0.31	25.72	0.85	3.07	0.17	17.69	0.92	2.57	0.15	3.08	0.14	32.68	0.86	1556.24	293.834	32041.1	622.553
GV15JAW261_39	1.68	0.34	276.9	5.7	333.5	5.9	417.6	6.5	0.32	0.13	453.2	6.2	1418	14	203.4	2.8	962	14	180.6	4.2	10.74	0.49	143.8	3.2	16.97	0.39	84.8	1.7	15.64	0.45	36.8	1.1	4.45	0.22	25.38	0.9	3.67	0.17	19.21	0.44	79.7	1.4	1804.41	307.206	30593.9	611.97
GV15JAW261_40	1.23	0.3	230.6	8.1	316	11	394	10	0.055	0.06	357.4	9.4	1184	34	177.2	5.2	858	19	162.4	7	10.2	0.49	134.5	6.8	15.41	0.88	75.7	3.4	14.32	0.45	34.1	1.5	3.86	0.3	23.2	1.5	3.12	0.18	4.41	0.29	39.9	1.7	1400.39	285.565	30930.7	614.436
BM16JAW070_1			2957	37	106.7	1.5	2062	26	0.006	0.013	312.4	4.1	902	10	122.6	1.7	544.4	6.8	200	4.1	4.4	0.27	251.3	4	54.09	0.95	356.1	5.2	68.4	0.97	184.7	2.7	26.67	0.47	173	3.4	21.47	0.49	3.59	0.12	10.81	0.21	676.91	241.796	31014.2	614.737
BM16JAW070_2			2573	44	104.8	2.3	2394	39	0.057	0.038	303.7	4.6	974	15	146.1	2.5	685	12	276.4	6.3	3.83	0.23	348.8	6.4	71.2	1.4	452.9	8.6	81.7	1.4	210.5	3.9	30.13	0.62	196.6	4.1	25.13	0.58	2.622	0.092	52.5	1.2	765.41	247.707	29856.7	605.046
BM16JAW070_3			2480	77	103.7	3.5	2041	67	0.053	0.073	152	9.3	593	31	98.5	4.8	496	24	226.3	8.7	3.21	0.41	302	14	63.7	2.4	385	16	68.7	2.5	175.7	6.5	24.7	1.1	160.7	7	19.9	1	2.51	0.18	21.34	0.99	508.95	230.522	29197.8	600.167
BM16JAW070_4			2644	45	106.4	2.4	2256	44	0.015	0.021	306.2	5.5	949	16	142.8	3	658	13	266.6	7	4.3	0.31	326.1	6.7	67.8	1.4	422.5	8.6	76.6	1.6	196.8	3.8	28.14	0.6	181.8	3.7	22.38	0.55	2.67	0.1	31.82	0.83	403.57	223.108	29700.7	604.231
BM16JAW070_5			3013	68	103.6	2.7	2286	55	0.058	0.044	302.3	7.4	1008	22	153.6	3.8	718	17	294.9	7.7	4.21	0.27	355	11	73.3	2	447	11	78.6	1.8	195	4.5	26.89	0.75	170.9	4.6	21.36	0.72	3.18	0.12	39.33	0.83	1358.11	283.563	27695.5	588.297
BM16JAW070_6			2740	50	100.9	1.9	2438	40	0.044	0.035	287.5	4.6	934	15	141.7	2.9	677	13	274.7	5.6	4.19	0.28	338.2	6.1	70.6	1.5	443.8	7.9	82.1	1.7	214.3	4.2	31.48	0.76	215.2	4.7	27.38	0.58	2.22	0.11	25.31	0.6	614.29	237.685	30206.6	608.397
BM16JAW070_7			2783	59	111.5	2.8	2408	52	0.048	0.045	288	6.5	944	18	141.9	2.6	648	13	255.6	7.6	4.48	0.35	327.6	9.4	67.6	2.1	437.8	8.1	81.7	1.6	213.6	5.2	31.86	0.91	208.9	4.6	26.61	0.72	3.65	0.15	31.05	0.9	453.65	226.654	28721.3	596.599
BM16JAW070_8			3563	65	105.9	2.6	3259	55			256.3	5	881	16	145.9	2.5	746	16	286.9	6.3	4.38	0.26	367.3	8.1	82.8	1.5	560	11	110.4	2	306.3	5.8	46.98	0.98	292.5	5.6	39.19	0.86	1.519	0.08	42.31	0.86	879.11	254.977	30587.3	611.071
BM16JAW070_9			2704	49	104.4	2.3	1934	32			304.1	4.7	894	13	125.4	1.9	560	11	189.7	3.8	4.01	0.27	255.7	4.4	54.3	1.2	363.7	6.5	70.1	1.4	177.8	3	25.05	0.53	147.6	2.9	18.35	0.47	1.475	0.086	43.1	0.74	331.73	217.878	29172.8	600.522
BM16JAW070_10			3123	47	107.7	1.8	2356	34	0.054	0.038	273.6	4.9	883	11	134.8	2	636	13	257.6	5.8	4.03	0.21	315.3	6.8	67.3	1.1	432.2	7.1	79.1	1.3	208.8	3.2	30.59	0.64	204.7	3.9	25.86	0.56	2.207	0.086	31.9	0.5	2215.17	328.724	24191.8	555.749
BM16JAW070_11			2684	55	97.7	1.6	2272	36	0.04	0.031	301.4	4.9	972	13	145.6	2.5	672	11	272.5	5.5	3.67	0.25	323.2	6.2	67.9	1.2	423.6	5.9	75.7	1.2	195.4	3.3	28.63	0.6	184	3.5	23.53	0.57	2.33	0.1	15.11	0.31	951.42	259.401	32760.6	627.897
BM16JAW070_12			2562	40	102.8	2.4	2342	36	0.033	0.028	291.9	4.8	931	15	139.9	2.1	666	12	267	5.6	4.05	0.25	327.6	6.1	67.5	1	428.3	8	78.4	1.4	204.5	3.7	31.02	0.79	203.7	4	26.47	0.73	2.392	0.096	19.48	0.38	734.98	245.886	28893.8	598.732
BM16JAW070_13			2276	36	99.6	1.9	2311	37	0.038	0.03	303.9	9.1	962	25	143.1	3.3	665	13	266.3	5.7	3.86	0.26	327.8	6.7	68.3	1.2	432.2	7.3	78	1.6	203.5	3.1	29.47	0.67	193.1	4.3	24.32	0.66	5.51	0.19	16.68	0.4	589.33	236.082	30661.6	611.91
BM16JAW070_14			2684	42	109.4	2.1	2459	40	0.006	0.013	269.4	4.1	934	16	142.9	2.3	676	11	282.2	5.9	4.43	0.24	360.1	7	74	1.5	461.1	7.9	83.1	1.4	213.2	3.9	30.51	0.56	195.7	3.2	24.37	0.57	2.86	0.12	21.33	0.4	629.87	238.838	31009.3	614.793
BM16JAW070_15			2568	45	105	2.1	2135	33	0.045	0.043	314.4	7.1	948	16	135.9	2.6	615	13	236.4	6.1	4.3	0.26	283.8	6.4	59.5	1	386.7	8.5	69.9	1.7	186.8	4.5	28.52	0.76	196.7	5	25.95	0.66	6.29	0.22	13.9	0.43	581.39	235.566	28025.3	591.227
BM16JAW070_16			2455	45	97.5	2.2	2282	38			287.5	4.7	952	15	142.8	2.5	656	11	269.6	5.3	3.4	0.2	328.3	6.8	68.2	1.4	430.6	9	75.8	1.5	195.1	3.3	28.61	0.72	190.3	3.9	24.1	0.59	3.1	0.13	15.58	0.36	581.72	235.604	29098.6	599.85
BM16JAW070_17			2614	39	99.2	1.4	2501	33	0.056	0.036	306.1	4.5	984	13	148.9	2.5	703	11	284.3	5.8	3.82	0.22	342.3	5.1	71.8	1.2	457.6	6.4	82.7	1.4	217	3.2	31.77	0.68	212.9	4.1	26.75	0.53	2.39	0.1	13.07	0.29	838.39	252.352	28921.3	597.485
BM16JAW070_18			3294	73	102.7	2.8	2622	47	0.27	0.15	303.4	8	924	24	133.3	3.2	622	15	218.3	6.2	5.43	0.33	292.7	7	63.1	1.5	444	11	89.8	2.5	256.8	6.4	38.2	1	247.5	7.4	33.6	1.1	2.94	0.19	55.2	1.3	542.64	232.916	27591.3	587.546
BM16JAW070_19			2423	48	108.7	3.2	2208	58			242.3	9.9	817	30	129.9	4.2	619	19	257.4	8	3.83	0.31	314.9	8.1	66.8	2	415	11	74.3	2.8	187.1	5.7	27.4	1.2	172.7	6.6	22.15	0.97	2.29	0.15	24.39	0.72	761.63	247.454	29402.7	602.285
BM16JAW070_20			2764	50	93.9	1.9	2292	36	0.033	0.028	305.3	4.7	975	13	144.4	2.3	672	11	266.2	5.4	4.12	0.24	321.9	6.1	67.6	1.2	420.9	6.5	77.4	1.3	199.6	3.4	29.05	0.58	198.2	3	24.77	0.55	3.1	0.11	19.09	0.36	943.51	259.007	27645.2	586.067
BM16JAW070_21			2615	39	94.9	1.5	2303	30	0.064	0.039	293.1	6.9	929	16	139.8	3	661	11	270.7	5.3	4.23	0.28	333.7	6.3	68.2	1.2	427.8	6.9	77.3	1.4	199.4	3.1	29.38	0.64	195.3	3.2	24.62	0.55	2.407	0.08	16.13	0.39	572.49	234.911	24931.9	565.251
BM16JAW070_22			2609	35	99.3	1.8	2449	35	0.053	0.038	287.3	4.4	928	13	140.7	2.3	672	13	272.5	4.7	3.97	0.25	337.3	4.4	69.8	1.1	440.3	6.1	81.9	1.3	213.1	3.4	31.2	0.61	208	3.8	26.06	0.45	2.584	0.096	16.01	0.49	485.1	228.792	32424	625.551
BM16JAW070_23			2760	40	90	1.8	2413	32	0.025	0.029	281.7	5.5	941	15	141.9	2.6	657	10	278.8	5.2	3.69	0.24	339.4	6.5	70.99	0.93	444.7	7.3	79.5	1.4	204.9	3.7	30.07	0.67	196.3	3.2	24.81	0.6	3.67	0.13	19.7	0.4	428.75	224.846	28555.5	594.491
BM16JAW070_24			2625	56	92.8	3.2	2435	65	0.14	0.15	235.2	7.2	767	23	117.8	3.8	551	17	201.7	6.1	4.1	0.35	261.2	9.2	58.9	1.5	410	12	82.9	2.5	233.5	8.1	36.7	1.3	242.6	8.1	32.34	0.95	1.27	0.11	77.3	2.7	1047.72	265.354	28555.4	595.289
BM16JAW070_25			2405	38	108.1	4	897	69			97	14	389	41	69	5.9	387	23	185	11	1.89	0.18	214	13	37.5	2	203	15	33.2	2.8	77.4	5.5	10.1	1	57.7	5.4	6.96	0.48	0.53	0.15	11.79	0.37	477.22	228.399	29545.1	603.884
BM16JAW070_26			3051	60	109.5	2.4	2717	42	0.106	0.05	326	5.8	960	15	136.7	2.8	632	11	212.1	4.2	4.42	0.23	290.4	6.1	64.3	1.1	451.4	7.2	93.9	1.5	264.3	4.9	39.28	0.85	262.3	5.2	35.1	0.7	2.859	0.087	75.8	1.2	621.9	238.383	22364.2	541.254
BM16JAW070_27			3767	78	108.6	2	2052	28	0.052	0.037	259.1	4.7	830	12	118.7	2	530.9	9.7	207	4.3	5.04	0.33	268.6	6.3	56.2	1.1	365.8	5.9	69.6	1.2	185	3.1	26.86	0.64	181	4.4	23.04	0.54	3.64	0.11	15.17	0.37	1462.57	289.362	28860.3	598.026
BM16JAW070_28			2691	41	103	2.4	2249	33	0.008	0.016	300.1	4.6	955	13	142.5	2.4	665	12	264	5.3	4.31	0.25	320	5.8	66.8	1.3	418.6	6.9	75.5	1.3	195.3	3.8	28.42	0.54	181.4	3	22.68	0.54	2.1	0.1	23.73	0.46	644.76	239.808	30922.2	613.972
BM16JAW070_29			2555	66	97.5	2.7	2472	61			332.9	8.4	1174	30	172.5	4.4	767	23	305.8	8.8	3.82	0.33	352.9	9.1	75.4	2.4	460	12	79.9	2.4	207.5	6	32	1.3	217.3	6.6	27.59	0.87	5.21	0.19	19.94	0.86	685.08	242.357	30423.5	610.058
BM16JAW070_30			2352	36	106.2	2.1	2393	39	0.089	0.057	296.7	5.1	961	16	143.1	2.7	678	12	271.4	6	4.18	0.23	330.4	7.6	69.5	1.2	444.9	7.3	81.5	1.6	211.5	3.8	31.24	0.65	211.3	4.9	26.4	0.61	2.66	0.12	47.74	0.92	477.24	228.298	28732.4	595.956
BM16JAW070_31			2351	47	106.8	3.6	2277	42	0.058	0.048	291.4	6.1	929	21	135.4	3.3	618	14	246.2	6.6	4.4	0.36	298.4	6.2	63.9	1.6	410.8	8.5	75.7	1.8	199.6	4.4	29.98	0.89	202.4	5	25.86	0.87	3.12	0.18	17.9	0.53	621.35	238.392	22880.3	547.832
BM16JAW070_32			2830	44	105.5	2.6	2506	49	0.071	0.052	306.4	6.8	987	20	146.1	3.6	676	19	272.4	8.5	4.5	0.39	332.3	8.8	69.7	1.3	448	11	82.1	2	219.3	5.7	31.49	0.81	209.6	6.6	26.24	0.87	3.64	0.25	18.9	0.61	492.88	229.449	28578.2	595.301
BM16JAW070_33			3025	48	108.3	1.8	2326	30	0.049	0.035	200.5	5.4	647	14	99.7	2	489.4	9.2	182.7	4.4	4.27	0.26	249.7	5.4	55.68	0.96	388.6	6.3	79.4	1.4	222.6	3.6	33.16	0.58	216.9	3.7	28.64	0.55	2.154	0.096	53.5	1	2304.57	332.826	20926.2	529.496
BM16JAW070_34			2562	36	92.9	1.7	2377	32	0.041	0.035	304.9	3.7	1025	14	153.9	2.2	712	12	300.8	5.8	3.77	0.29	340.3	6.6	72	1.1	441.5	7.9	76.1	1.5	198	3.8	31.22	0.75	218.6	3.6	28.77	0.68	6.92	0.17	11.58	0.39	510.29	230.663	30637.1	612.01
BM16JAW070_35			3115	60	123.8	3.5	2554	51	0.18	0.11	267.1	6.7	817	19	119.7	2.8	542	14	192.4	4.7	4.71	0.4	246.6	6.1	57.6	1.3	408.3	7.3	84.4	1.9	242.6	6.2	39.1	1	271.8	5.6	35.75	0.99	2.74	0.14	76.6	2.6	13439	684.096	3229.4	319.19
BM16JAW070_36			2825	58	104.6	1.9	2575	47	0.047	0.044	299.5	4.9	972	17	146	3.1	681	13	279.6	7.3	4.26	0.26	348.2	8.3	73.8	1.7	470.7	9.2	87.3	1.6	226	4.8	32.81	0.71	214.3	5.4	27.03	0.66	3.31	0.15	28.2	0.6	509.8	230.594	28102.8	591.114
BM16JAW070_37			6820	150	110.9	3.7	1869	35			267.4	5.7	832	18	119	3.2	534	12	205.9	6.7	7.48	0.51	245	6.3	52.1	1.1	333.3	7.9	61.6	1.3	163.1	3.7	24.38	0.59	165.9	4.4	20.72	0.61	2.81	0.16	14.48	0.44	2019.98	318.912	26775.1	581.486
BM16JAW070_38			3960	61	106.6	1.7	2215	32	0.028	0.028	309.5	5.4	981	15	142.1	2.4	640.3	9.7	249	5.7	4.79	0.27	299.7	5.8	63	1.1	401.3	7	74.3	1.2	193.7	3.7	28.11	0.67	185.8	4	23.64	0.52	3.53	0.11	13.4	0.28	1159.25	271.965	30523.1	611.03
BM16JAW070_39			2581	58	95.3	2.5	2365	46	0.076	0.055	308.1	7.4	1039	26	153.5	3.5	699	17	284.6	7.9	3.83	0.25	321.9	8.3	70	1.7	432	11	75.1	2.1	197.1	5.3	30.8	1.1	223.3	6.9	28.64	0.65	7.63	0.26	13.17	0.43	566.68	234.506	28511.3	594.335
BM16JAW070_40			2754	64	111.2	3.2	2472	50	0.32	0.13	315.1	8.2	1009	23	149.9	3.1	704	19	280.9	7.5	4.31	0.39	348	12	72.1	1.9	454	11	83.3	2	215.6	6.2	31	0.93	204.9	5.6	25.64	0.78	2.66	0.14	49	2.2	460.57	227.191	29021.5	598.824
BM16JAW070_41			2714	35	106.8	2.3	2389	38	0.21	0.11	307.5	7.8	973	15	144.8	3	683	13	269.8	7.3	3.86	0.37	327.8	7.5	69	1.8	441.2	9.1	81.9	1.4	207.7	3.3	29.99	0.82	197.2	4.1	24.18	0.66	2.42	0.13	30.77	0.64	556.48	233.815	29523	603.509
BM16JAW070_42			2520	38	92.3	1.5	2820	36			331.6	4.3	1122	15	168.8	2.7	787	12	328.8	6.6	3.79	0.24	396.8	7.3	83.6	1.3	512.2	7.5	92.6	1.4	237.1	3.6	34.97	0.67	234	4.1	29.04	0.56	4.16	0.12	20.45	0.43	476.7	228.304	29188.3	599.761
BM16JAW070_43			2452	41	92	1.4	2609	36	0.054	0.038	306.2	4.8	1048	16	158.3	2.8	744	11	305.8	5.5	3.64	0.22	375.5	6.2	78.9	1.4	485.5	7.6	87	1.4	224.4	3.5	32.55	0.55	214	4.1	26.48	0.51	4.62	0.15	20.48	0.42	324.73	217.315	30389.9	609.518
